# Supplementary material
Source: PubMed Central journal article supplement (PMC3122233)

## Supplemental Figure 1

Function and component classification  
in each condition

## Homocysteine+SAM

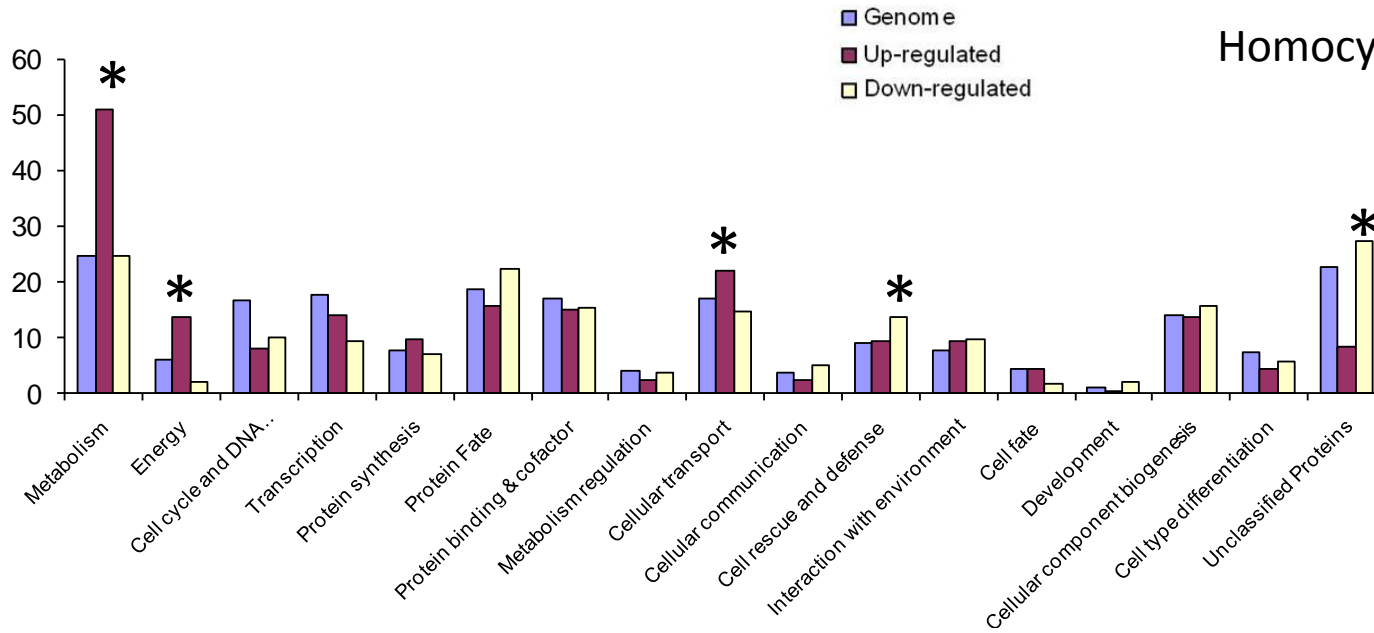

## Homocysteine

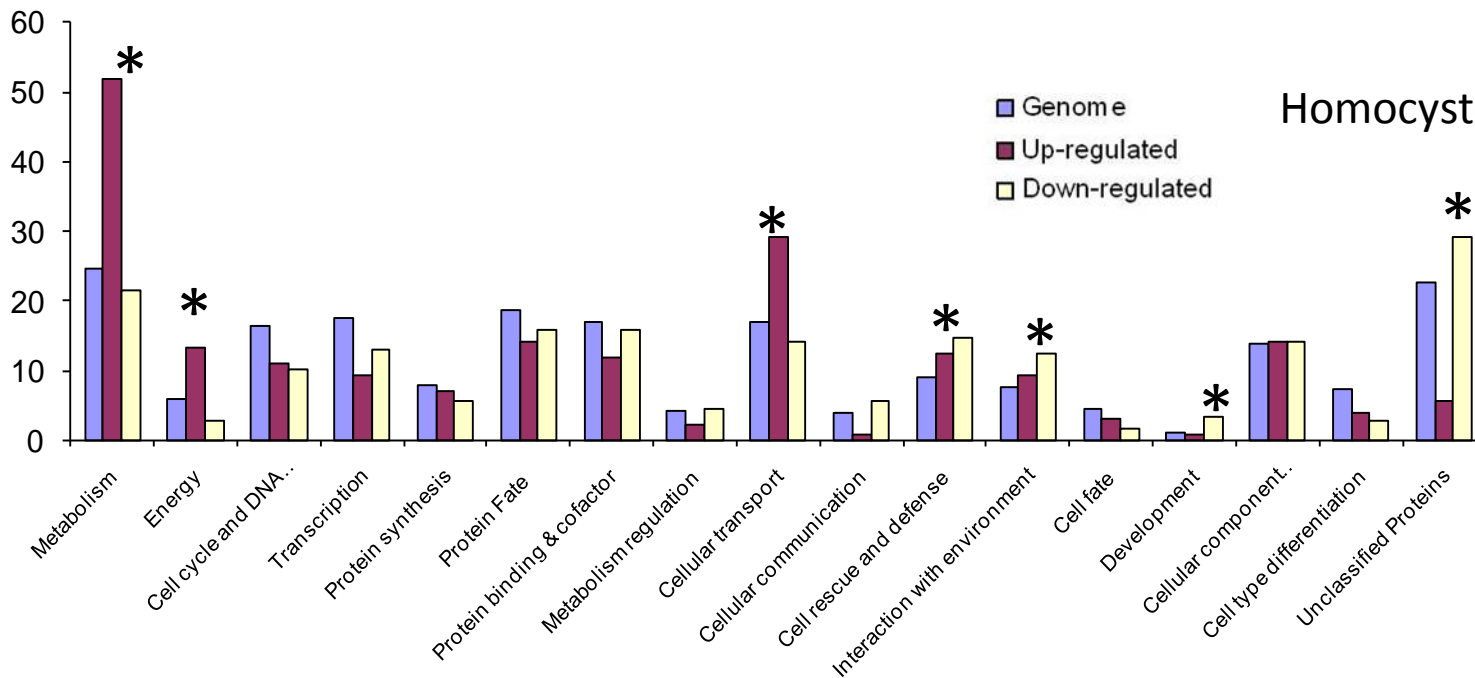

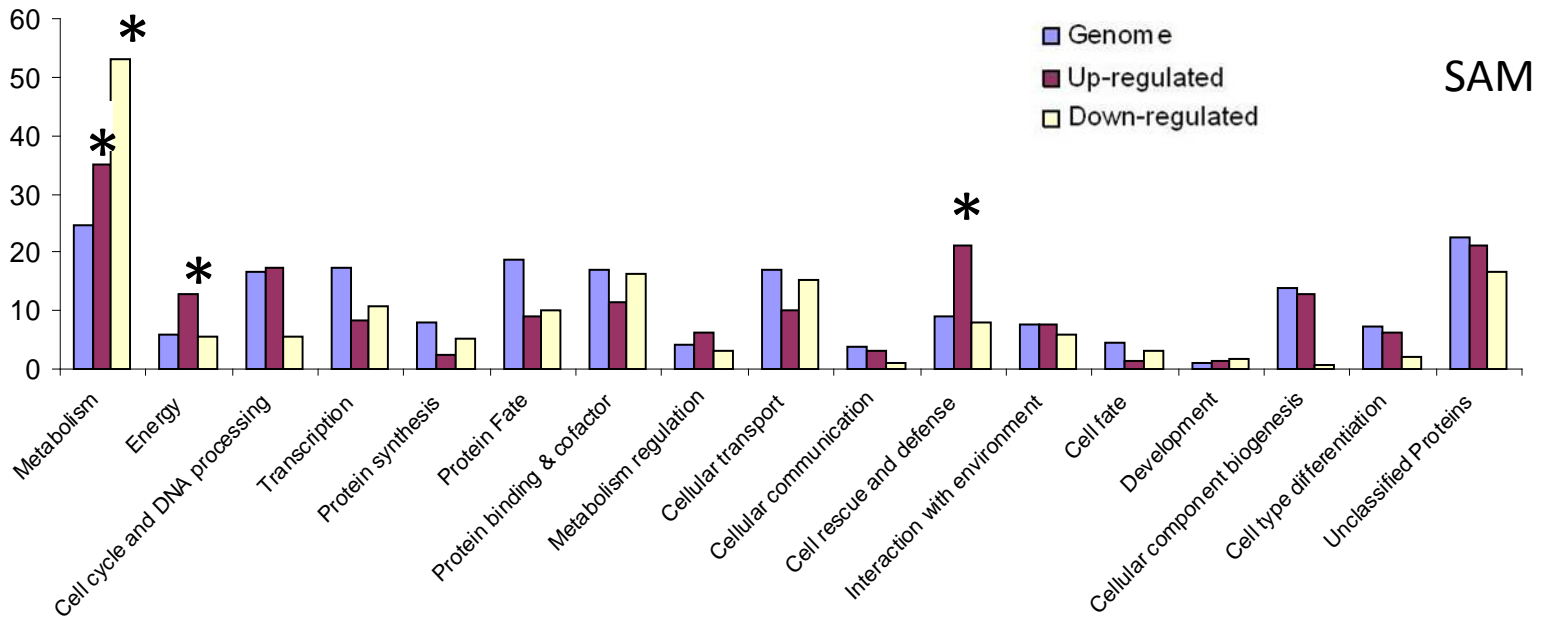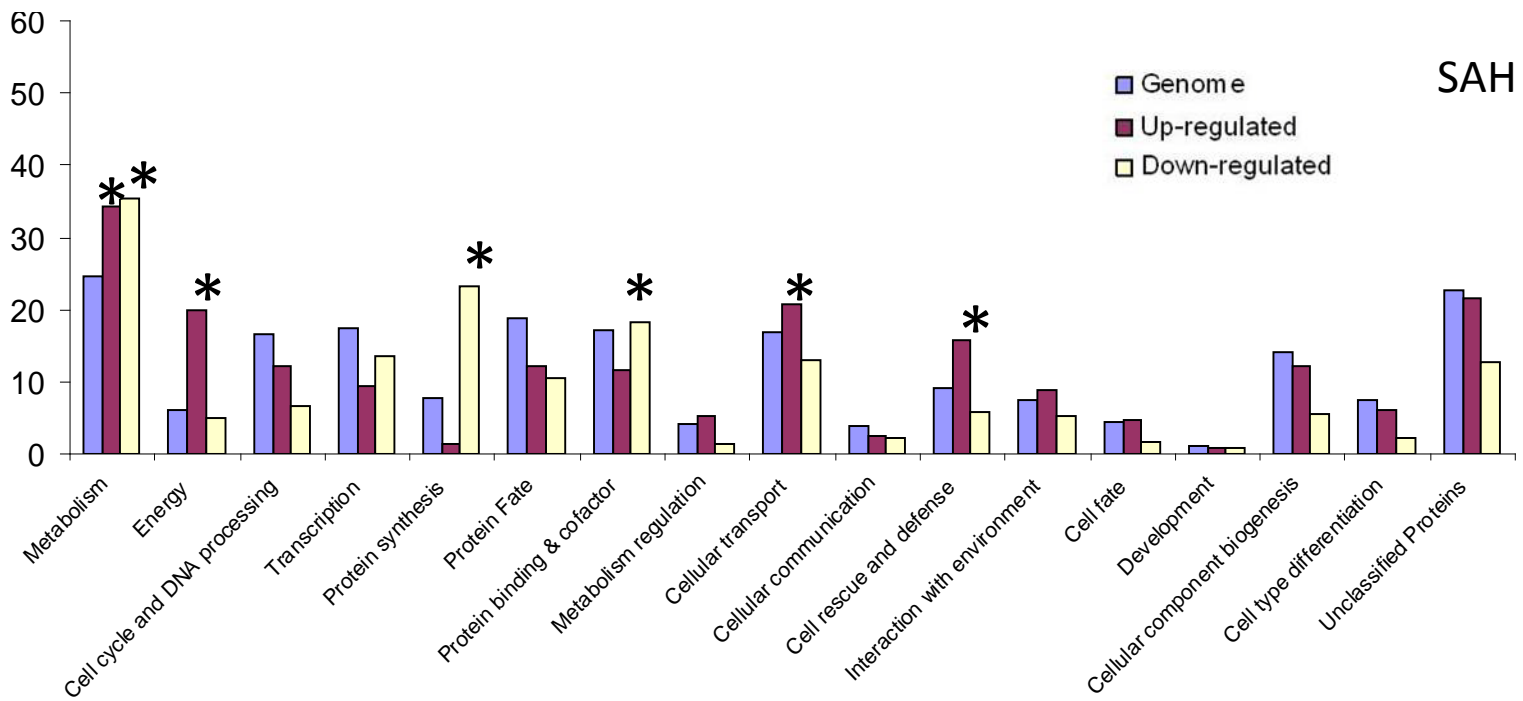

# SAM+SAH

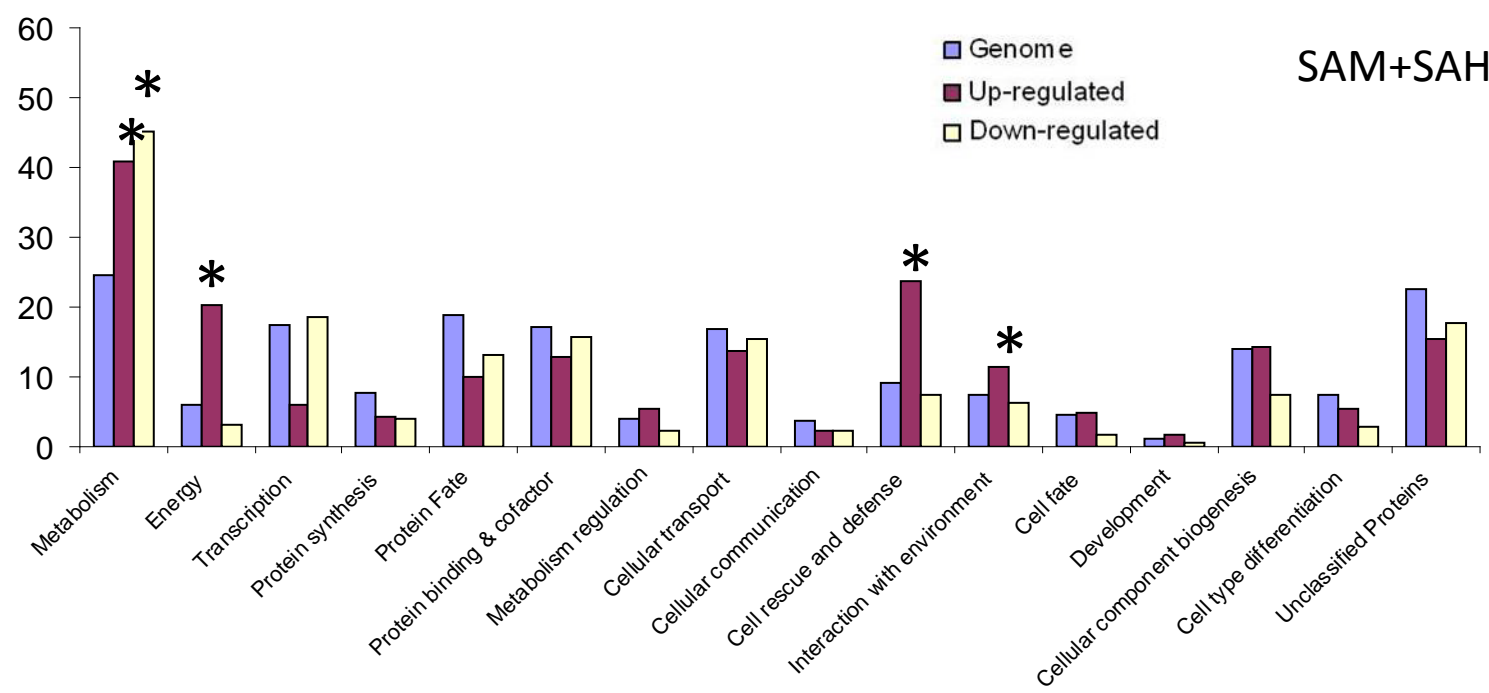

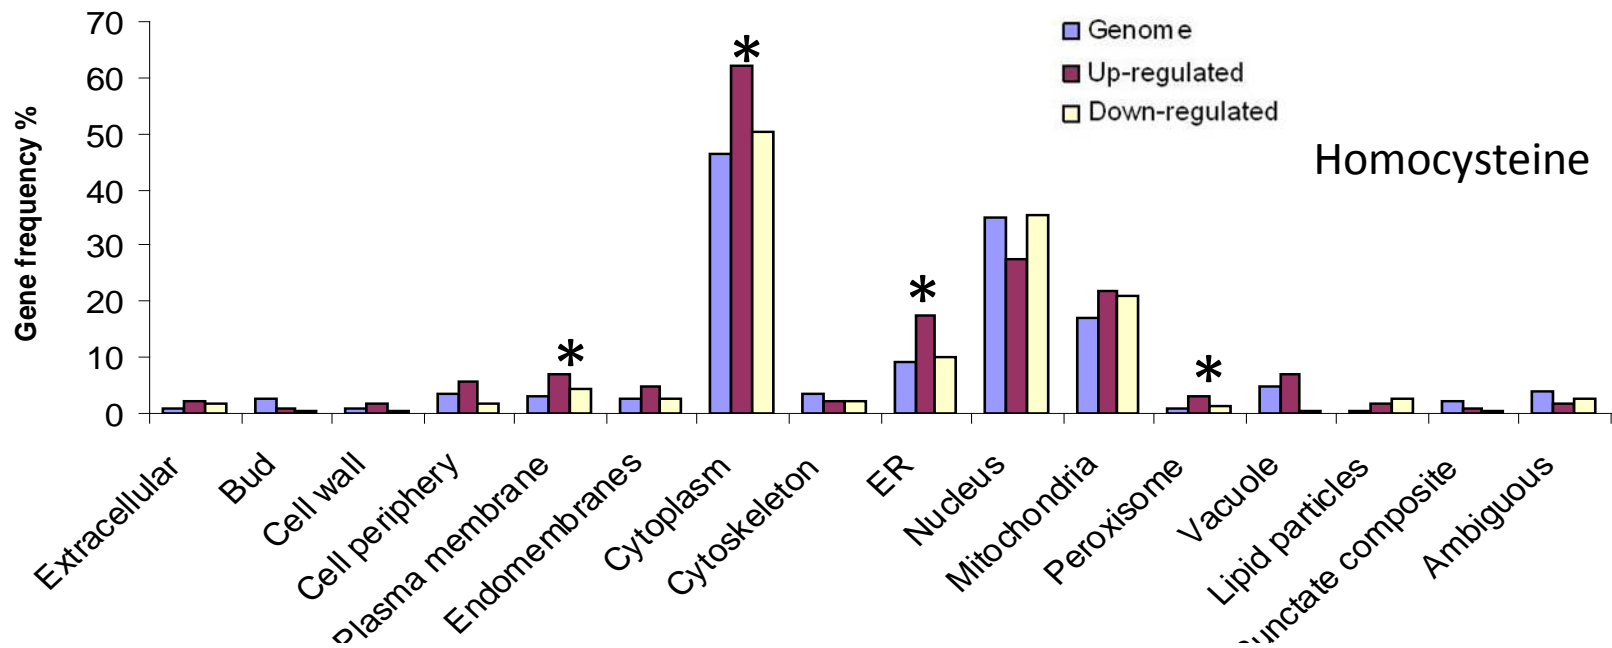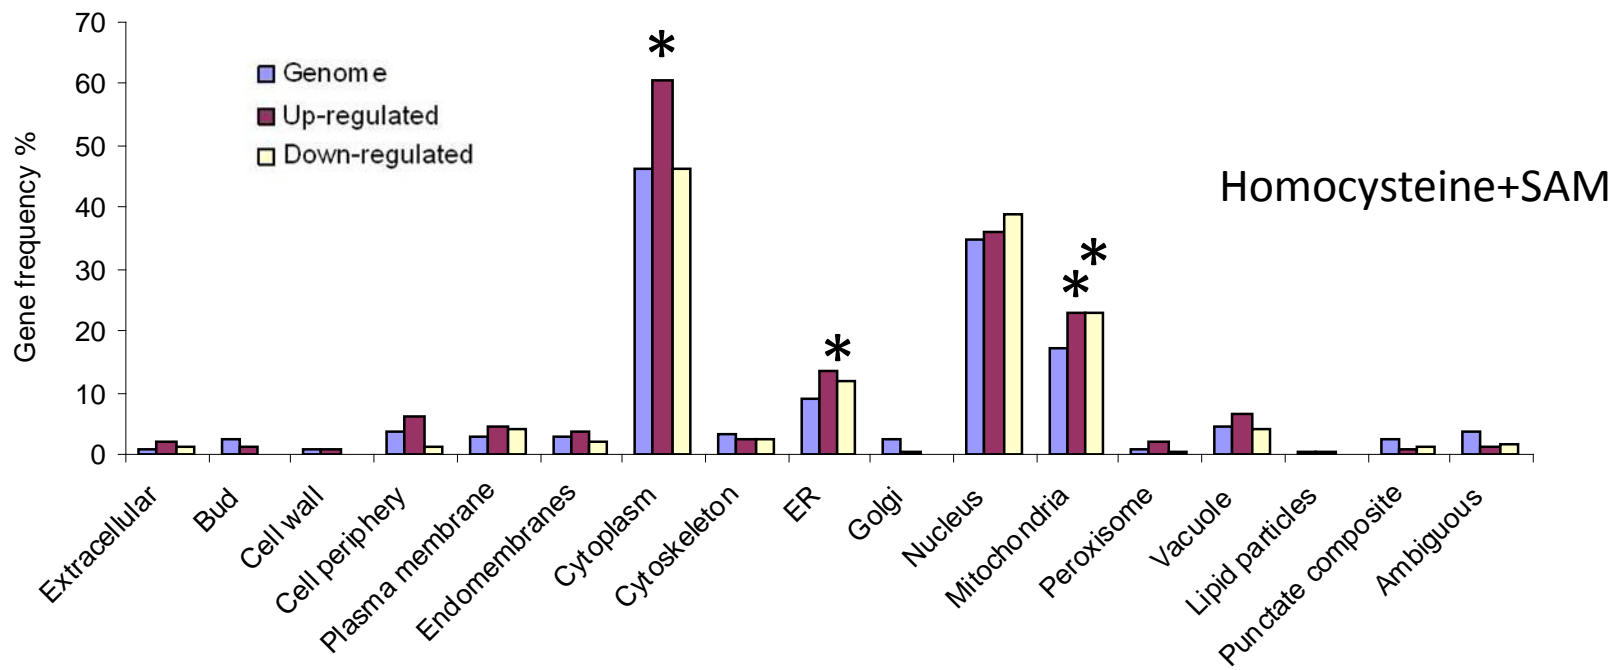

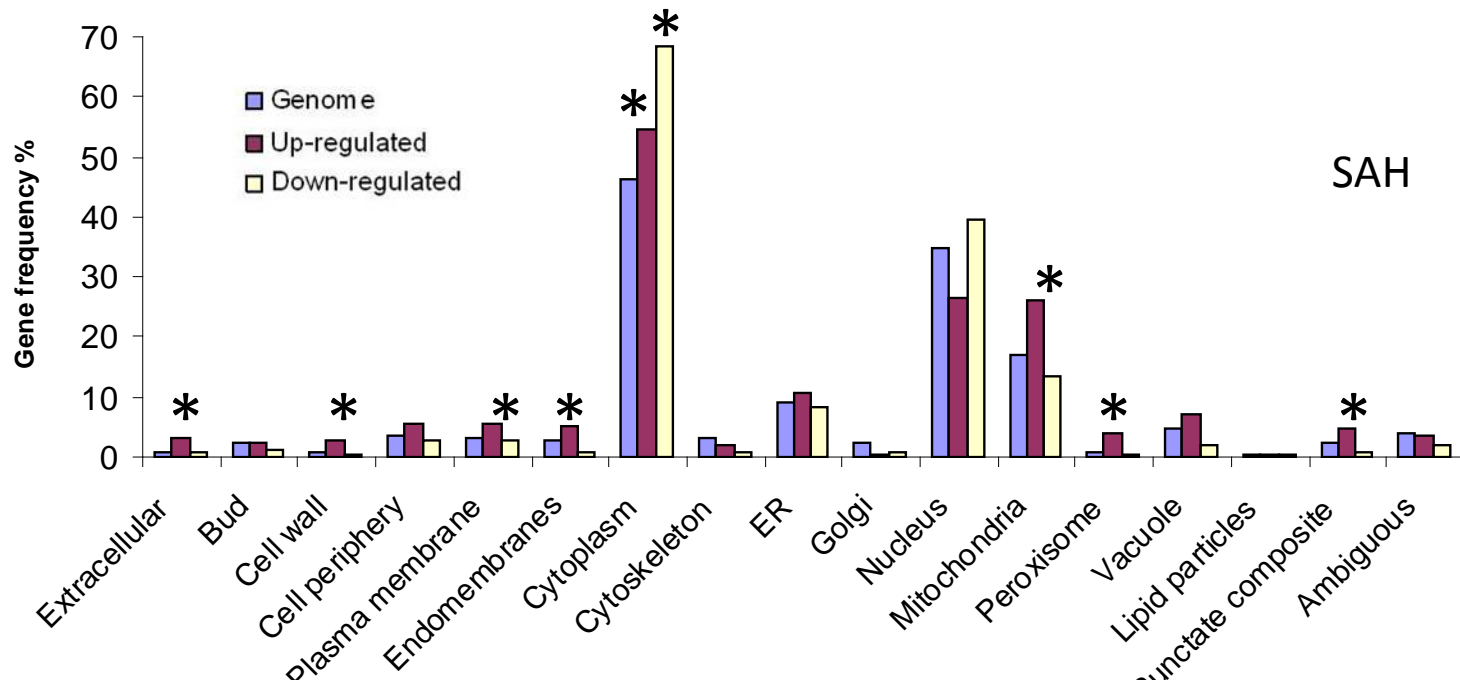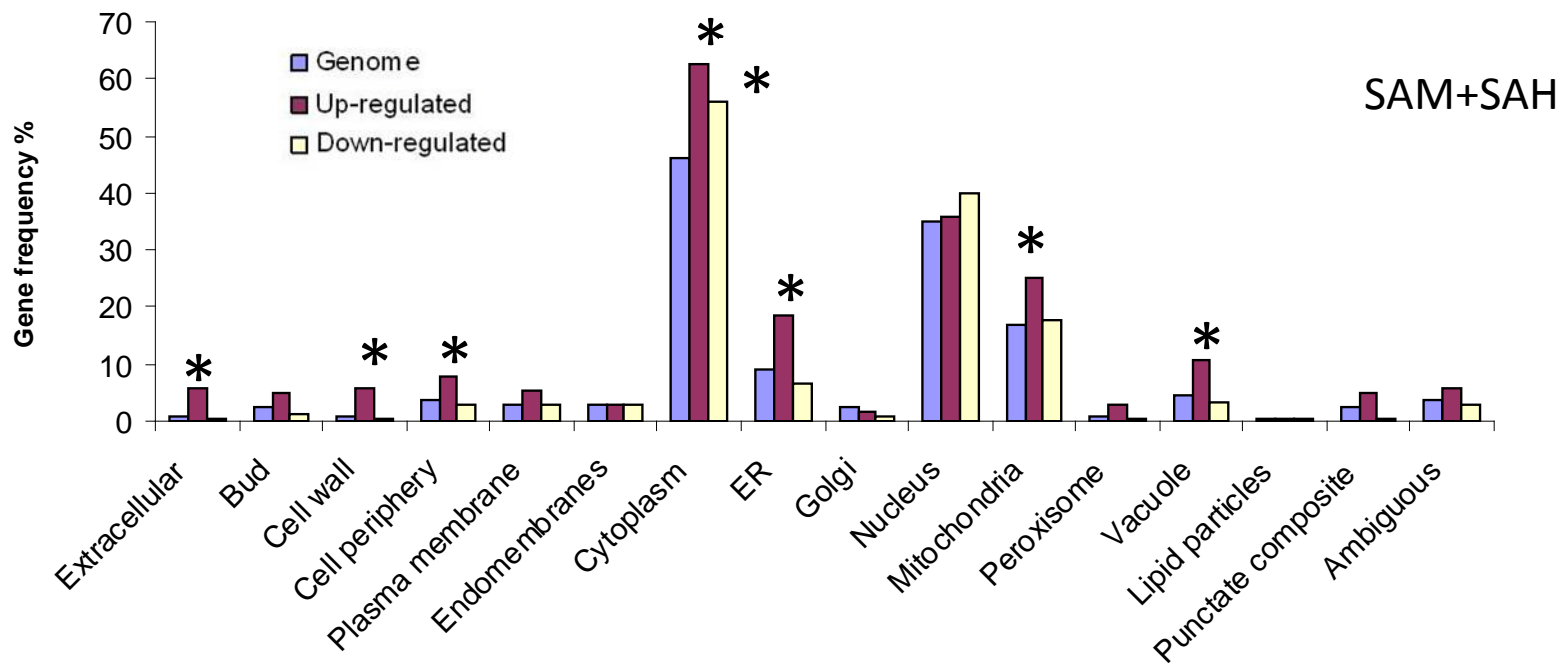

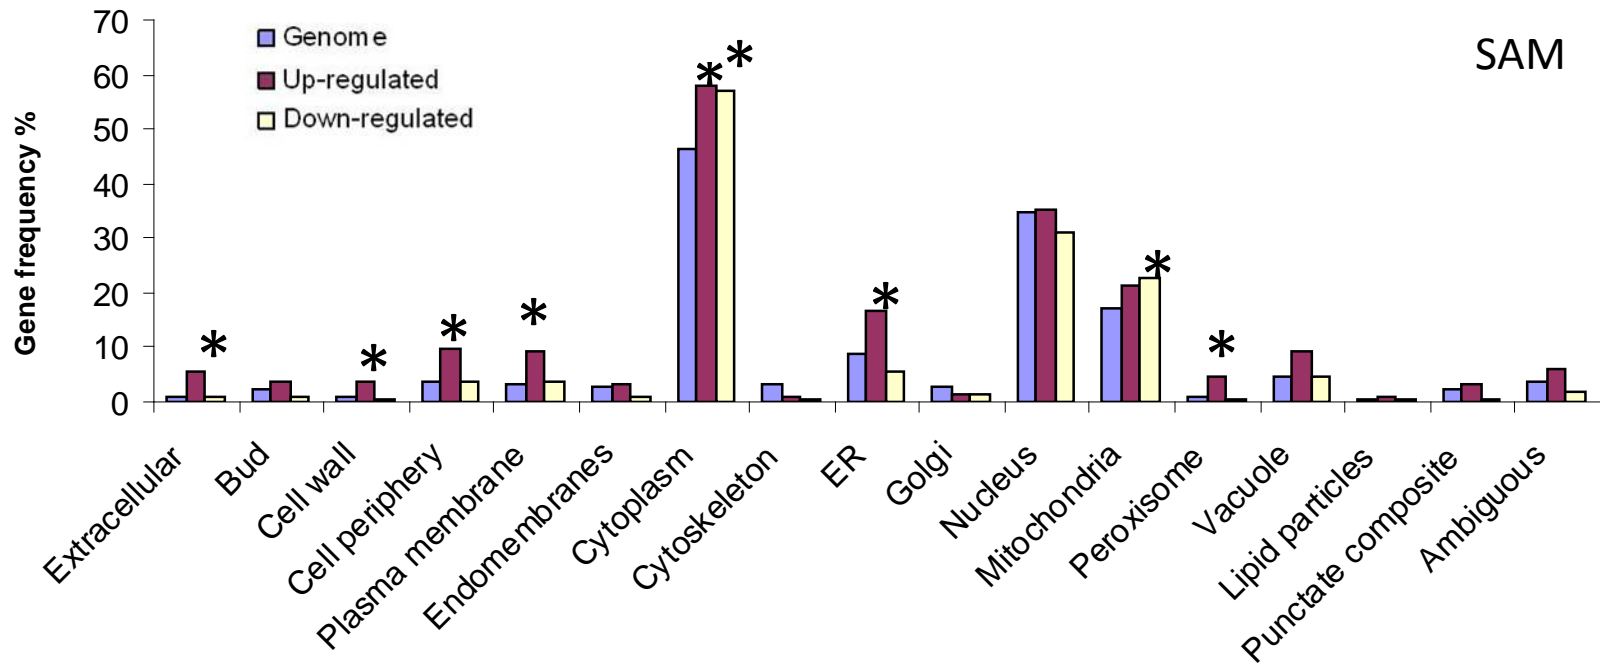

Supplement: supp_M111.228072_Supplemental_figure_1.pdf [file supp_M111.228072_Supplemental_figure_1.pdf]
