# Supplementary material
Source: PubMed Central journal article supplement (PMC3122233)
Supplement: supp_M111.228072_Supplemental_Table_1.pdf [file supp_M111.228072_Supplemental_Table_1.pdf]

## UP REGULATED GENES IN WILD VS STR4Δ

| ORF NAME    | NANE             | FOLD CHANGE |
|-------------|------------------|-------------|
| YAL061W     | BDH2             | 22.412487   |
| YAL034C     | FUN19            | 2.0178847   |
| YAR023C     | UNKNOWN          | 2.0406356   |
| YBL078C     | ATG8             | 2.6622105   |
| YBL015W     | ACH1             | 2.8651729   |
| YBR050C     | REG2             | 5.7503147   |
| YBR054W     | YRO2             | 2.871016    |
| YBR069C     | TAT1             | 3.7674901   |
| YBR117C     | TKL2             | 4.2791505   |
| YBR132C     | AGP2             | 3.1272657   |
| YBR169C     | SSE2             | 2.8144104   |
| YBR183W     | YPC1             | 2.2498794   |
| YBR214W     | SDS24            | 2.3776252   |
| YBR230W-A   | UNKNOWN          | 2.4489336   |
| YBR238C     | UNKNOWN          | 3.133503    |
| YBR285W     | UNKNOWN          | 9.870781    |
| YBR299W /// | MAL12 ///        |             |
| YGR292W     | MAL32            | 2.1219926   |
| YCL038C     | ATG22            | 2.4286723   |
| YCL010C     | SGF29            | 2.3025024   |
| YCR010C     | ADY2             | 3.8247032   |
| YCR021C     | HSP30            | 3.2788422   |
| YCR061W     | UNKNOWN          | 2.5241618   |
| YCR068W     | ATG15            | 2.0956504   |
| YCR091W     | KIN82            | 3.070507    |
| YCR102C     | UNKNOWN          | 2.2587726   |
| YDL248W /// |                  |             |
| YJR161C     | COS5 ///<br>COS7 | 2.1409435   |
| YDL222C     | FMP45            | 4.8814883   |
| YDL204W     | RTN2             | 3.3617768   |
| YDL181W     | INH1             | 3.073026    |
| YDL169C     | UGX2             | 2.2554948   |
| YDL086W     | UNKNOWN          | 3.428442    |
| YDL079C     | MRK1             | 5.3810596   |
| YDR018C     | UNKNOWN          | 2.0464451   |
| YDR034C-A   | UNKNOWN          | 2.051768    |
| YDR074W     | TPS2             | 2.0726037   |
| YDR107C     | TMN2             | 2.4716685   |
| YDR216W     | ADR1             | 2.2955194   |
| YDR277C     | MTH1             | 2.0621014   |

|             |               |           |
|-------------|---------------|-----------|
| YDR342C /// |               |           |
| YDR343C     | HXT6 /// HXT7 | 3.7977939 |
| YDR406W     | PDR15         | 5.954672  |
| YDR453C     | TSA2          | 3.183049  |
| YDR516C     | EMI2          | 2.0319574 |
| YEL073C     | UNKNOWN       | 2.1009076 |
| YEL070W /// |               |           |
| YNR073C     | DSF1          | 2.561117  |
| YEL039C     | CYC7          | 5.4054255 |
| YEL021W     | URA3          | 4.792565  |
| YEL011W     | GLC3          | 2.354217  |
| YER011W     | TIR1          | 2.091281  |
| YER039C-A   | UNKNOWN       | 2.0521028 |
| YER053C-A   | UNKNOWN       | 3.6709566 |
| YER103W     | SSA4          | 2.3513849 |
| YER142C     | MAG1          | 2.402395  |
| YER150W     | SPI1          | 2.0912    |
| YFL054C     | UNKNOWN       | 4.217216  |
| YFL014W     | HSP12         | 8.084383  |
| YFR015C     | GSY1          | 2.3076105 |
| YFR053C     | HXK1          | 3.0704162 |
| YGL222C     | EDC1          | 2.2684076 |
| YGL104C     | VPS73         | 2.2923496 |
| YGL055W     | OLE1          | 2.3980536 |
| YGR035C     | UNKNOWN       | 7.343891  |
| YGR043C     | NQM1          | 6.6860127 |
| YGR052W     | FMP48         | 3.5282943 |
| YGR088W     | CTT1          | 2.7091968 |
| YGR204C-A   | UNKNOWN       | 4.501106  |
| YGR205W     | UNKNOWN       | 2.955298  |
| YGR236C     | SPG1          | 2.011206  |
| YGR243W     | FMP43         | 7.767141  |
| YGR248W     | SOL4          | 2.5242903 |
| YGR249W     | MGA1          | 4.9394464 |
| YGR256W     | GND2          | 2.2971714 |
| YGR260W     | TNA1          | 2.0322785 |
| YGR289C     | MAL11         | 2.348257  |
| YHL008C     | UNKNOWN       | 2.1305811 |
| YHR053C /// | CUP1-1 ///    |           |
| YHR055C     | CUP1-2        | 2.2604291 |
| YHR092C     | HXT4          | 2.4315429 |
| YHR094C     | HXT1          | 2.0406547 |
| YHR143W     | DSE2          | 2.4354792 |

|             |         |           |
|-------------|---------|-----------|
| YHR209W     | CRG1    | 2.204731  |
| YIL169C     | UNKNOWN | 2.9845526 |
| YIL169C /// |         |           |
| YOL155C     | HPF1    | 6.80969   |
| YIL155C     | GUT2    | 2.3406312 |
| YIL136W     | OM45    | 3.2309747 |
| YIL105C     | SLM1    | 2.048431  |
| YIL101C     | XBP1    | 3.771633  |
| YIL097W     | FYV10   | 2.0513718 |
| YIL084C     | SDS3    | 2.035188  |
| YIL057C     | UNKNOWN | 5.6889296 |
| YIL029C     | UNKNOWN | 2.0525029 |
| YIR039C     | YPS6    | 3.4032574 |
| YJL219W     | HXT9    | 3.0664973 |
| YJL218W     | UNKNOWN | 2.0655677 |
| YJL216C     | UNKNOWN | 2.7455006 |
| YJL212C     | OPT1    | 2.7846968 |
| YJL078C     | PRY3    | 3.1469963 |
| YJR096W     | UNKNOWN | 2.3195405 |
| YJR115W     | UNKNOWN | 2.498307  |
| YJR149W     | UNKNOWN | 2.2665787 |
| YKL216W     | URA1    | 2.219745  |
| YKL162C     | UNKNOWN | 2.152123  |
| YKL148C     | SDH1    | 3.0357985 |
| YKL096W     | CWP1    | 3.379543  |
| YKL093W     | MBR1    | 7.4439745 |
| YKL026C     | GPX1    | 3.6544938 |
| YKR058W     | GLG1    | 2.0531352 |
| YKR075C     | UNKNOWN | 2.7056148 |
| YKR098C     | UBP11   | 2.3399012 |
| YLL031C     | GPI13   | 2.3354342 |
| YLL018C-A   | COX19   | 2.1315553 |
| YLR054C     | OSW2    | 2.3095372 |
| YLR070C     | XYL2    | 2.2202024 |
| YLR080W     | EMP46   | 2.083575  |
| YLR083C     | EMP70   | 2.203499  |
| YLR099C     | ICT1    | 2.7265882 |
| YLR142W     | PUT1    | 3.0115159 |
| YLR149C     | UNKNOWN | 2.374417  |
| YLR154W-E   | UNKNOWN | 2.3478444 |
| YLR231C     | BNA5    | 2.2944686 |
| YLR271W     | UNKNOWN | 2.3058393 |
| YLR303W     | MET17   | 4.8197474 |

|           |         |           |
|-----------|---------|-----------|
| YLR327C   | TMA10   | 3.1572583 |
| YLR342W   | FKS1    | 2.1158786 |
| YLR346C   | UNKNOWN | 4.885288  |
| YLR438W   | CAR2    | 3.4090786 |
| YLR460C   | UNKNOWN | 2.030493  |
| YML128C   | MSC1    | 3.3491442 |
| YML123C   | PHO84   | 2.1837199 |
| YML120C   | NDI1    | 2.2535837 |
| YML118W   | NGL3    | 2.176405  |
| YML100W   | TSL1    | 2.0373564 |
| YML054C   | CYB2    | 7.223444  |
| YML003W   | UNKNOWN | 2.1512926 |
| YMR011W   | HXT2    | 3.9737751 |
| YMR034C   | UNKNOWN | 2.1691997 |
| YMR056C   | AAC1    | 2.325461  |
| YMR081C   | ISF1    | 5.0874186 |
| YMR090W   | UNKNOWN | 3.4084074 |
| YMR104C   | YPK2    | 2.5270405 |
| YMR105W-A | UNKNOWN | 2.125953  |
| YMR107W   | SPG4    | 5.3608623 |
| YMR145C   | NDE1    | 2.4130113 |
| YMR169C   | ALD3    | 3.4123025 |
| YMR174C   | PAI3    | 2.3715596 |
| YMR194C-B | UNKNOWN | 2.598059  |
| YMR195W   | ICY1    | 2.5678718 |
| YMR206W   | UNKNOWN | 2.1510944 |
| YMR244W   | UNKNOWN | 2.9548762 |
| YMR250W   | GAD1    | 2.3943868 |
| YMR274C   | RCE1    | 2.6605356 |
| YMR280C   | CAT8    | 2.6096032 |
| YMR281W   | GPI12   | 2.1870248 |
| YMR303C   | ADH2    | 2.0384517 |
| YNL277W-A | UNKNOWN | 2.3884192 |
| YNL268W   | LYP1    | 3.3215241 |
| YNL237W   | YTP1    | 2.9781609 |
| YNL202W   | SPS19   | 3.0735602 |
| YNL195C   | UNKNOWN | 2.2776265 |
| YNL194C   | UNKNOWN | 8.1454735 |
| YNL160W   | YGP1    | 2.3204563 |
| YNL144C   | UNKNOWN | 2.1998951 |
| YNL093W   | YPT53   | 3.4438517 |
| YNL066W   | SUN4    | 2.065147  |
| YNR002C   | ATO2    | 5.4059577 |

|           |         |           |
|-----------|---------|-----------|
| YNR034W-A | UNKNOWN | 4.2396207 |
| YOL155C   | HPF1    | 3.5828626 |
| YOL084W   | PHM7    | 5.3249583 |
| YOL083W   | UNKNOWN | 2.803267  |
| YOL052C-A | DDR2    | 2.0597668 |
| YOL048C   | RRT8    | 2.0688183 |
| YOL047C   | UNKNOWN | 2.233904  |
| YOR028C   | CIN5    | 2.884307  |
| YOR031W   | CRS5    | 3.1344764 |
| YOR040W   | GLO4    | 2.1384315 |
| YOR049C   | RSB1    | 13.119886 |
| YOR060C   | UNKNOWN | 2.1317203 |
| YOR083W   | WHI5    | 2.1407979 |
| YOR100C   | CRC1    | 4.1034813 |
| YOR153W   | PDR5    | 3.2962427 |
| YOR161C   | PNS1    | 2.4634335 |
| YOR173W   | DCS2    | 2.3166    |
| YOR178C   | GAC1    | 8.754584  |
| YOR347C   | PYK2    | 2.3459556 |
| YOR374W   | ALD4    | 2.684428  |
| YOR376W-A | UNKNOWN | 2.7947738 |
| YOR386W   | PHR1    | 2.9226282 |
| YPL230W   | USV1    | 3.8177624 |
| YPL186C   | UIP4    | 2.3898125 |
| YPL123C   | RNY1    | 2.0293398 |
| YPR151C   | SUE1    | 2.05075   |
| YPR160W   | GPH1    | 2.6193554 |
| YPR192W   | AQY1    | 2.6341262 |

## DOWN REGULATED GENES IN WILD VS STR4Δ

| ORF NAME    | NAME          | FOLD CHANGE |
|-------------|---------------|-------------|
| YAL044C     | GCV3          | 2.2571502   |
| YAR009C     | UNKNOWN       | 4.794552    |
| YAR068W     | UNKNOWN       | 2.1981616   |
| YBL100W-B   | UNKNOWN       | 7.14736     |
| YBL085W     | BOI1          | 2.730951    |
| YBL016W     | FUS3          | 3.609404    |
| YBL005W-B   | UNKNOWN       | 5.9923615   |
| YBR043C     | QDR3          | 2.2016072   |
| YBR047W     | FMP23         | 3.455204    |
| YBR073W     | RDH54         | 2.0065255   |
| YBR083W     | TEC1          | 4.628573    |
| YBR104W     | YMC2          | 3.5143194   |
| YBR115C     | LYS2          | 62.89968    |
| YBR133C     | HSL7          | 2.2598658   |
| YBR145W     | ADH5          | 2.4430065   |
| YBR147W     | RTC2          | 2.3422651   |
| YBR155W     | CNS1          | 2.3778381   |
| YBR213W     | MET8          | 2.7658477   |
| YBR244W     | GPX2          | 2.2433696   |
| YBR248C     | HIS7          | 2.503691    |
| YBR291C     | CTP1          | 8.334694    |
| YBR294W     | SUL1          | 16.292757   |
| YCL066W /// | HMLALPHA1 /// |             |
| YCR040W     | MATALPHA1     | 3.1925206   |
| YCL064C     | CHA1          | 3.6473975   |
| YCL030C     | HIS4          | 2.1359227   |
| YCL027W     | FUS1          | 8.812557    |
| YCL026C-B   | HBN1          | 2.0664315   |
| YCL021W-A   | UNKNOWN       | 3.1913662   |
| YCL018W     | LEU2          | 80.20735    |
| YCR018C     | SRD1          | 9.339888    |
| YCR089W     | FIG2          | 3.2264025   |
| YDL240W     | LRG1          | 2.0209985   |
| YDL198C     | GGC1          | 2.8707519   |
| YDL182W     | LYS20         | 14.840757   |
| YDL170W     | UGA3          | 2.5452883   |
| YDL138W     | RGT2          | 2.8813188   |

|           |            |           |
|-----------|------------|-----------|
| YDL131W   | LYS21      | 3.8147695 |
| YDR034C   | LYS14      | 2.3692822 |
| YDR035W   | ARO3       | 2.0494955 |
| YDR228C   | PCF11      | 2.0174477 |
| YDR234W   | LYS4       | 3.230484  |
| YDR253C   | MET32      | 2.1216245 |
| YBL005W-B | UNKNOWN    | 5.280731  |
| YBL005W-B | UNKNOWN    | 5.7340903 |
| YDR270W   | CCC2       | 2.3884296 |
| YDR309C   | GIC2       | 2.152047  |
| YDR451C   | YHP1       | 2.8033864 |
| YDR528W   | HLR1       | 2.560731  |
| YEL072W   | RMD6       | 2.5517986 |
| YEL071W   | DLD3       | 3.019587  |
| YEL065W   | SIT1       | 3.7577348 |
| YER024W   | YAT2       | 2.6824992 |
| YER040W   | GLN3       | 2.2374704 |
| YER052C   | HOM3       | 3.1899827 |
| YER055C   | HIS1       | 2.3262496 |
| YER069W   | ARG5,6     | 5.0164733 |
| YER073W   | ALD5       | 2.0906727 |
| YBL107W-A | UNKNOWN    | 2.242569  |
| YER145C   | FTR1       | 2.0635285 |
| YER175C   | TMT1       | 4.889874  |
| YFL034C-A | RPL22B     | 2.3495173 |
| YFL021W   | GAT1       | 2.1790273 |
| YFR030W   | MET10      | 2.0183558 |
| YFR055W   | IRC7       | 2.3744376 |
| YGL255W   | ZRT1       | 3.9705617 |
| YGL224C   | SDT1       | 2.0533156 |
| YGL184C   | STR3       | 2.2124698 |
| YGL148W   | ARO2       | 2.0180717 |
| YGL125W   | MET13      | 2.09073   |
| YGL117W   | UNKNOWN    | 2.8043237 |
| YGL089C   | MF(ALPHA)2 | 133.49336 |
| YGL009C   | LEU1       | 4.3945413 |
| YGR014W   | MSB2       | 2.4508796 |
| YGR032W   | GSC2       | 6.804124  |
| YGR065C   | VHT1       | 2.8252752 |
| YGR079W   | UNKNOWN    | 2.1479461 |
| YGR109W-B | UNKNOWN    | 3.1241264 |
| YGR109W-A | UNKNOWN    | 2.3883936 |
| YGR121C   | MEP1       | 3.0001445 |

|           |         |           |
|-----------|---------|-----------|
| YGR177C   | ATF2    | 2.9930882 |
| YGR208W   | SER2    | 2.2138903 |
| YGR239C   | PEX21   | 4.240375  |
| YHL040C   | ARN1    | 3.4357307 |
| YHL036W   | MUP3    | 3.0684342 |
| YHR005C   | GPA1    | 4.44154   |
| YHR018C   | ARG4    | 3.1614418 |
| YHR021W-A | ECM12   | 2.3022182 |
| YHR029C   | YHI9    | 3.3597488 |
| YHR046C   | INM1    | 2.824264  |
| YHR048W   | YHK8    | 2.763449  |
| YHR084W   | STE12   | 2.810324  |
| YHR208W   | BAT1    | 2.7496479 |
| YIL165C   | NIT1    | 3.9276118 |
| YIL164C   | NIT1    | 2.7967458 |
| YIL130W   | ASG1    | 2.913403  |
| YIL121W   | QDR2    | 2.0268574 |
| YIL119C   | RPI1    | 2.6844604 |
| YIL117C   | PRM5    | 6.9964795 |
| YIL116W   | HIS5    | 2.5153332 |
| YIL094C   | LYS12   | 3.9472892 |
| YGR109W-B | UNKNOWN | 2.7455473 |
| YIL079C   | AIR1    | 2.7191339 |
| YIL074C   | SER33   | 2.3800828 |
| YIR017C   | MET28   | 3.9439304 |
| YIR034C   | LYS1    | 9.201074  |
| YJL200C   | ACO2    | 7.1994624 |
| YJL181W   | UNKNOWN | 2.7296653 |
| YJL157C   | FAR1    | 10.947188 |
| YJL122W   | ALB1    | 2.2864556 |
| YJL088W   | ARG3    | 7.8055687 |
| YJL071W   | ARG2    | 2.2329671 |
| YJR004C   | SAG1    | 28.665173 |
| YJR016C   | ILV3    | 2.0979757 |
| YJR063W   | RPA12   | 3.34814   |
| YJR097W   | JJJ3    | 2.6920555 |
| YJR109C   | CPA2    | 4.5072536 |
| YJR130C   | STR2    | 2.481044  |
| YJR148W   | BAT2    | 2.029708  |
| YKL218C   | SRY1    | 2.0206592 |
| YKL211C   | TRP3    | 2.042899  |
| YKL178C   | STE3    | 5.030532  |
| YKL125W   | RRN3    | 2.2186499 |



|             |                |            |
|-------------|----------------|------------|
| YKL120W     | OAC1           | 4.047854   |
| YKL110C     | KTI12          | 2.2127402  |
| YKL106W     | AAT1           | 5.477771   |
| YKL068W-A   | UNKNOWN        | 3.3044093  |
| YKR013W     | PRY2           | 2.3698401  |
| YKR039W     | GAP1           | 2.9926174  |
| YKR069W     | MET1           | 2.6165793  |
| YBL109W     | UNKNOWN        | 3.3998177  |
| YLL064C /// |                |            |
| YNR076W     | PAU18 /// PAU6 | 2.82819    |
| YLR040C     | UNKNOWN        | 2.566489   |
| YLR042C     | UNKNOWN        | 4.0329447  |
| YLR084C     | RAX2           | 2.3953404  |
| YLR089C     | ALT1           | 2.3001294  |
| YLR092W     | SUL2           | 2.2048678  |
| YLR136C     | TIS11          | 3.0335598  |
| YLR154C-H   | UNKNOWN        | 6.3446536  |
| YLR297W     | UNKNOWN        | 3.5208457  |
| YLR355C     | ILV5           | 2.2857819  |
| YLR364W     | GRX8           | 2.1400073  |
| YLR452C     | SST2           | 8.462281   |
| YLR466C-B   | UNKNOWN        | 10.72375   |
| YLR466C-B   | UNKNOWN        | 7.8222566  |
| YML116W     | ATR1           | 5.167449   |
| YML076C     | WAR1           | 2.2945817  |
| YMR001C     | CDC5           | 2.151965   |
| YMR062C     | ARG7           | 4.5094266  |
| YMR095C     | SNO1           | 25.516321  |
| YMR096W     | SNZ1           | 58.20807   |
| YMR100W     | MUB1           | 2.0829237  |
| YMR108W     | ILV2           | 2.4813457  |
| YMR189W     | GCV2           | 2.4493237  |
| YMR199W     | CLN1           | 4.1707973  |
| YNL311C     | UNKNOWN        | 2.2303257  |
| YNL289W     | PCL1           | 3.0543063  |
| YNL270C     | ALP1           | 2.2408502  |
| YNL240C     | NAR1           | 2.1453836  |
| YNL218W     | MGS1           | 2.0260046  |
| YNL164C     | IBD2           | 2.4285128  |
| YNL142W     | MEP2           | 2.7042947  |
| YNL113W     | RPC19          | 2.1773837  |
| YNL053W     | MSG5           | 2.0554986  |
| YNR044W     | AGA1           | 11.1311655 |

|         |            |           |
|---------|------------|-----------|
| YNR050C | LYS9       | 12.736951 |
| YNR057C | BIO4       | 2.1826332 |
| YNR058W | BIO3       | 2.3300676 |
| YNR068C | UNKNOWN    | 2.067007  |
| YOL140W | ARG8       | 3.412868  |
| YOL119C | MCH4       | 4.9594836 |
| YOL064C | MET22      | 2.7605834 |
| YOL058W | ARG1       | 6.9367943 |
| YOL036W | UNKNOWN    | 2.0776038 |
| YOL017W | ESC8       | 2.1626716 |
| YOR044W | IRC23      | 2.5187898 |
| YOR130C | ORT1       | 3.7343895 |
| YOR184W | SER1       | 2.1376903 |
| YOR202W | HIS3       | 2.8065572 |
| YOR222W | ODC2       | 2.258     |
| YOR226C | ISU2       | 3.6311653 |
| YOR302W | UNKNOWN    | 3.126457  |
| YOR303W | CPA1       | 3.1755924 |
| YOR306C | MCH5       | 2.0944438 |
| YOR315W | SFG1       | 3.0457683 |
| YOR337W | TEA1       | 3.5392926 |
| YPL264C | UNKNOWN    | 2.77623   |
| YPL212C | PUS1       | 2.318266  |
| YPL187W | MF(ALPHA)1 | 4.7179284 |
| YPL112C | PEX25      | 2.1300688 |
| YPL081W | RPS9A      | 2.4766726 |
| YPL058C | PDR12      | 2.2431724 |
| YPL030W | TRM44      | 2.1968868 |
| YPR122W | AXL1       | 3.1108012 |
| YPR145W | ASN1       | 2.5452821 |
| YPR167C | MET16      | 2.9762287 |
