# Supplementary material
Source: PubMed Central journal article supplement (PMC3122233)
Supplement: supp_M111.228072_Supplemental_Table_2.pdf [file supp_M111.228072_Supplemental_Table_2.pdf]

| Systematic SGD names |           | Fold change in each category |          |             |          |            |
|----------------------|-----------|------------------------------|----------|-------------|----------|------------|
| ORF name             | Gene name | SAM                          | SAH      | SAM SAH     | HCY      | HCY+SAM    |
| YFL013W-A            | Unknown   | 14.09855                     | 21.20301 | 10.0481573  | 3.123918 | 2.55279304 |
| YBR093c              | PHO5      | 10.74554                     | 4.465743 | 16.68520187 | 1.987845 | 2.03902483 |
| YBR092c              | PHO3      | 10.61256                     | 3.905707 | 13.96285197 | 2.383579 | 2.11840799 |
| YFL014w              | HSP12     | 9.786761                     | 15.84668 | 7.933063121 | 3.146738 | 2.86976963 |
| YBR072w              | HSP26     | 9.740313                     | 16.41152 | 16.80778736 | 2.052382 | 1.229594   |
| YHR215w              | PHO12     | 5.522936                     | 2.989998 | 9.558189459 | 1.696969 | 1.33950254 |
| YAL061w              | BDH2      | 5.270068                     | 19.94738 | 6.271754847 | 3.205536 | 3.14946246 |
| YNL195c              | YNL195c   | 5.14999                      | 5.595729 | 1.505774373 | 1.645583 | 1.42790735 |
| YOL159c              | YOL159c   | 4.829557                     | 0.957755 | 0.954075844 | 0.610757 | 0.59344339 |
| YBR157c              | ICS2      | 4.683455                     | 2.407191 | 2.025143772 | 1.565406 | 0.87923958 |
| YCR010c              | ADY2      | 4.665308                     | 15.60687 | 2.891274765 | 2.840974 | 0          |
| YPL061w              | ALD6      | 4.658258                     | 10.77137 | 3.579111852 | 3.480544 | 2.78244189 |
| YMR175w              | SIP18     | 4.377544                     | 4.80855  | 3.412560754 | 1.151934 | 1.19875268 |
| YKL097W-A            | Unknown   | 4.290416                     | 3.341663 | 4.485869433 | 0.850945 | 1.00389852 |
| YNL160w              | YGP1      | 4.225708                     | 4.89453  | 5.385057707 | 1.605766 | 1.65172675 |
| YNL191w              | DUG3      | 4.209526                     | 0.837385 | 0.493985498 | 0.705042 | 0.78109922 |
| YBR116c              | YBR116c   | 4.190668                     | 11.27878 | 2.773653312 | 2.50048  | 2.85807914 |
| YGR236c              | SPG1      | 4.187253                     | 17.37394 | 2.898460637 | 1.294557 | 1.85177476 |
| YNL149c              | PGA2      | 4.136714                     | 0.531353 | 0.641771697 | 0.643756 | 0.59555842 |
| YNR049c              | MSO1      | 3.967707                     | 1.734939 | 1.522031665 | 1.164879 | 1.15328936 |
| YMR286w              | MRPL33    | 3.892644                     | 0.949802 | 0.949800993 | 0.627699 | 0.62459341 |
| YDR011w              | SNQ2      | 3.664193                     | 1.878909 | 0.62959434  | 1.729718 | 1.81603401 |
| YOL161c              | YOL161c   | 3.64691                      | 1.715738 | 1.335479197 | 0.806859 | 0.81597016 |
| YJL157c              | FAR1      | 3.58949                      | 0.708773 | 0.834765602 | 0.476029 | 0.53541085 |
| YDR077w              | SED1      | 3.527431                     | 4.871556 | 3.631790921 | 1.266999 | 1.75540334 |
| YJR127c              | RSF2      | 3.51763                      | 2.642807 | 2.145951628 | 1.58635  | 1.73030303 |
| YMR169c              | ALD3      | 3.512836                     | 4.583829 | 5.011216858 | 1.314504 | 1.29316798 |
| YER150w              | SPI1      | 3.512153                     | 3.944189 | 2.526475676 | 0.931635 | 0          |
| YML094w              | GIM5      | 3.474618                     | 0.634605 | 0.762256643 | 1.023977 | 0.81798026 |
| YMR102c              | YMR102c   | 3.453903                     | 2.115283 | 0.847294701 | 1.707288 | 1.7401705  |
| YBR161w              | CSH1      | 3.399134                     | 0.784688 | 1.085606682 | 0.578225 | 0.54291723 |
| YBR009c              | HHF1      | 3.395845                     | 3.348891 | 2.919013284 | 1.047847 | 1.11585017 |
| YLR142w              | PUT1      | 3.39043                      | 5.275207 | 2.494735153 | 7.650281 | 7.41112961 |
| YDL021w              | GPM2      | 3.362426                     | 2.096287 | 3.065250062 | 0.582693 | 0.59630474 |
| YBR014c              | GRX7      | 3.359682                     | 1.004773 | 1.450753378 | 0.639869 | 0.53968061 |

|           |         |          |          |             |          |            |
|-----------|---------|----------|----------|-------------|----------|------------|
| YMR304C-A | Unknown | 3.345919 | 1.834655 | 2.08596758  | 0.799561 | 1.14501452 |
| YNL030w   | HHF2    | 3.340479 | 3.642619 | 2.89979037  | 1.093275 | 1.19279853 |
| YBR069c   | TAT1    | 3.306348 | 6.464317 | 3.917268881 | 2.615691 | 2.74433265 |
| YGR234w   | YHB1    | 3.304869 | 1.414197 | 5.812701949 | 1.740541 | 1.4129831  |
| YKL102c   | YKL102c | 3.290833 | 1.264754 | 1.643421388 | 0.904985 | 0.61278463 |
| YDL204w   | RTN2    | 3.264914 | 14.83148 | 3.841125295 | 1.94534  | 2.45756744 |
| YKL055c   | OAR1    | 3.226403 | 0.853112 | 0.521719659 | 0.6754   | 1.16851558 |
| YCL048w   | SPS22   | 3.190278 | 1.361148 | 1.383197733 | 0.57669  | 0.6094335  |
| YGR043c   | NQM1    | 3.180773 | 5.109486 | 3.255356764 | 1.81222  | 1.56218488 |
| YKL150w   | MCR1    | 3.16655  | 3.932144 | 2.298602129 | 1.319699 | 1.32990437 |
| YER121w   | YER121w | 3.159074 | 4.310604 | 2.862150198 | 1.491908 | 1.3889125  |
| YNL196c   | SLZ1    | 3.137127 | 3.429961 | 2.256955899 | 1.283876 | 1.28419708 |
| YLR056w   | ERG3    | 3.126742 | 0.789704 | 2.173033634 | 3.305605 | 3.10190052 |
| YLL016w   | SDC25   | 3.114686 | 1.852354 | 0.965268786 | 0.831834 | 0.84314041 |
| YEL047c   | YEL047c | 3.101193 | 0.706803 | 0.631576345 | 0.962753 | 0.92060258 |
| YLR376c   | PSY3    | 3.100042 | 1.83005  | 1.016730647 | 0.994068 | 0.90626031 |
| YKL096w   | CWP1    | 3.058326 | 3.977593 | 3.788829994 | 1.196082 | 1.1217385  |
| YOL053C-A | Unknown | 3.051447 | 6.391539 | 2.561278624 | 1.959862 | 1.52706288 |
| YIL012w   | YIL012w | 3.043699 | 14.91215 | 3.017822201 | 2.115608 | 3.55153646 |
| YGL158w   | RCK1    | 2.996455 | 5.616083 | 0.966477766 | 2.81913  | 0          |
| YGR088w   | CTT1    | 2.992244 | 7.552363 | 6.60623987  | 2.562818 | 1.52848794 |
| YAL054c   | ACS1    | 2.990979 | 4.12266  | 2.122407068 | 1.384157 | 1.41045907 |
| YER072w   | VTC1    | 2.92839  | 1.232292 | 2.999296468 | 0.814004 | 0.64308779 |
| YOL114c   | YOL114c | 2.921367 | 0.859567 | 0.997397708 | 0.478369 | 0.486713   |
| YDR046c   | BAP3    | 2.900918 | 2.772561 | 3.58799314  | 1.587729 | 1.78698873 |
| YKL198c   | PTK1    | 2.896131 | 1.789892 | 1.257159514 | 1.220778 | 1.2639846  |
| YLR231c   | BNA5    | 2.890588 | 1.571161 | 3.792654962 | 1.300445 | 1.38197352 |
| YKL026c   | GPX1    | 2.860518 | 4.633846 | 2.904049025 | 0.968969 | 0.89382089 |
| YNL148c   | ALF1    | 2.827977 | 0.93163  | 1.011661672 | 0.545651 | 0.54828348 |
| YDR133c   | YDR133c | 2.825031 | 4.424409 | 2.082097056 | 1.618087 | 1.55183063 |
| YLR375w   | STP3    | 2.823978 | 1.06416  | 0.779194874 | 1.890112 | 1.9446853  |
| YER103w   | SSA4    | 2.802665 | 2.23108  | 1.883020613 | 0.621815 | 0          |
| YER103w   | SSA4    | 2.802665 | 2.23108  | 1.883020613 | 0.621815 | #N/A       |
| YGL157w   | YGL157w | 2.799017 | 0.812046 | 1.481545699 | 0.674377 | 0.51769552 |
| YPL223c   | GRE1    | 2.797882 | 2.328698 | 1.67999819  | 0.995983 | 0          |
| YDR055w   | PST1    | 2.772761 | 2.577677 | 3.385076761 | 1.949447 | 1.86822535 |
| YPR037c   | ERV2    | 2.76939  | 1.268236 | 1.392996852 | 0.882272 | 0.90362889 |

|         |         |          |          |             |          |            |
|---------|---------|----------|----------|-------------|----------|------------|
| YGR279c | SCW4    | 2.763877 | 1.655991 | 1.762720542 | 1.751497 | 0          |
| YLL060c | GTT2    | 2.760355 | 1.905537 | 0.928870933 | 1.279815 | 1.21060853 |
| YBL113c | YBL113c | 2.756856 | 3.583924 | 2.65088003  | 0.977874 | 1.12650945 |
| YER062c | HOR2    | 2.754413 | 0.723617 | 1.281035449 | 0.717827 | 0.76929277 |
| YGL156w | AMS1    | 2.753078 | 1.976714 | 1.551817947 | 1.260564 | 0          |
| YIL160c | POT1    | 2.751944 | 19.28909 | 2.388486665 | 3.117576 | 4.77896297 |
| YKR069w | MET1    | 2.749852 | 0.282916 | 0.206236675 | 0.584119 | #N/A       |
| YLR284c | ECI1    | 2.748824 | 4.831214 | 1.976731826 | 1.285036 | 0          |
| YEL034w | HYP2    | 2.745329 | 2.601372 | 2.764108788 | 1.222706 | 1.02103377 |
| YML008c | ERG6    | 2.71764  | 1.149084 | 2.203412407 | 2.249077 | 1.57858491 |
| YGR052w | FMP48   | 2.707868 | 10.5146  | 3.96499918  | 3.56645  | 2.88427217 |
| YIL011w | TIR3    | 2.696788 | 2.388684 | 2.107331852 | 0.853973 | 0.92628524 |
| YNL144c | YNL144c | 2.675576 | 2.039707 | 1.232200544 | 1.573855 | 1.56522348 |
| YDR033w | MRH1    | 2.673451 | 1.015596 | 2.288815689 | 1.456161 | 1.98978305 |
| YBR054w | YRO2    | 2.670741 | 0.647462 | 2.130184065 | 1.625798 | 2.15198755 |
| YFL045c | SEC53   | 2.670676 | 1.089589 | 1.916499719 | 1.013314 | 1.01319673 |
| YGR108w | CLB1    | 2.666883 | 2.389128 | 2.732594215 | 1.588249 | 1.25914343 |
| YDL024c | DIA3    | 2.646342 | 3.132478 | 1.452512766 | 1.48242  | 1.80640161 |
| YDR367w | YDR367w | 2.64539  | 1.506474 | 2.427717707 | 1.132381 | 1.01173613 |
| YMR142c | RPL13b  | 2.644715 | 0.553498 | 1.317803088 | 0.967278 | 1.06751186 |
| YLR136c | TIS11   | 2.64175  | 0.538027 | 0.663775178 | 0.397046 | 0.42904936 |
| YBR078w | ECM33   | 2.633244 | 1.317164 | 2.730684417 | 1.245697 | 1.20359514 |
| YJR047c | ANB1    | 2.630315 | 2.577225 | 2.538834216 | 1.134691 | 1.07853463 |
| YDR543c | YDR543c | 2.610646 | 1.29379  | 0.792377364 | 0.557178 | 0.73074506 |
| YKL009w | MRT4    | 2.609438 | 0.550369 | 0.758764917 | 0.58353  | 0.87892345 |
| YLR042c | YLR042c | 2.589113 | 1.068187 | 0.90746475  | 0.575024 | 0.87470571 |
| YMR144w | YMR144w | 2.585652 | 2.242796 | 1.438341631 | 1.725803 | 1.29745447 |
| YBL039c | URA7    | 2.575391 | 0.605302 | 1.199990046 | 1.622217 | 1.85467155 |
| YML128c | MSC1    | 2.56737  | 7.815144 | 3.361037972 | 2.181288 | 2.08904428 |
| YDR203w | YDR203w | 2.546017 | 1.131843 | 0.95782001  | 1.659693 | 1.94049223 |
| YKL151c | YKL151c | 2.531257 | 3.315798 | 3.005364815 | 1.319963 | 1.42189537 |
| YJL005w | CYR1    | 2.527812 | 1.323847 | 3.442688809 | 0.771567 | 0.55822043 |
| YCR103C | Unknown | 2.512939 | 1.116776 | 1.040209887 | 0.519376 | 0.61266732 |
| YGR039w | YGR039w | 2.468713 | 1.035804 | 0.727461724 | 0.49839  | 0.50792921 |
| YKR093w | PTR2    | 2.457881 | 3.651278 | 2.170028367 | 0.962272 | 1.79585536 |
| YKL109w | HAP4    | 2.452655 | 3.590344 | 2.446628026 | 1.989153 | 2.00671894 |
| YKR070w | YKR070w | 2.452291 | 1.397969 | 1.640010347 | 1.087643 | 1.07064392 |

|         |         |          |          |             |          |            |
|---------|---------|----------|----------|-------------|----------|------------|
| YBL033c | RIB1    | 2.434765 | 1.008932 | 0.592012482 | 1.146963 | 1.13124579 |
| YLR377c | FBP1    | 2.43131  | 3.599088 | 1.746689022 | 1.263884 | 1.39579664 |
| YDR320c | SWA2    | 2.428834 | 1.927972 | 2.131106278 | 0.932081 | 0.99168301 |
| YDL214c | PRR2    | 2.428226 | 2.525608 | 1.185018637 | 1.146074 | 0          |
| YDR445c | YDR445c | 2.426581 | 1.791955 | 1.011010097 | 0.619968 | 0.58545797 |
| YDR018c | YDR018c | 2.4229   | 2.177843 | 1.762605459 | 0.61275  | 0          |
| YDR018c | YDR018c | 2.4229   | 2.177843 | 1.762605459 | 0.61275  | #N/A       |
| YLL010c | PSR1    | 2.417741 | 2.182102 | 0.717080715 | 1.222796 | 1.18992347 |
| YFL021w | GAT1    | 2.403979 | 2.726581 | 1.753669179 | 1.361219 | 1.21834154 |
| YER003c | PMI40   | 2.403073 | 1.51488  | 2.798474057 | 1.140919 | 1.09770415 |
| YMR090w | YMR090w | 2.400076 | 3.844557 | 3.24875688  | 1.316802 | 1.3775656  |
| YIL057c | YIL057c | 2.397604 | 14.59504 | 2.647911519 | 2.220696 | 2.44694606 |
| YMR251w | GTO3    | 2.393987 | 1.88086  | 2.525287855 | 1.251082 | 1.14450815 |
| YNL031c | HHT2    | 2.392301 | 2.471332 | 2.090729729 | 0.851208 | 0.91353939 |
| YCR098c | GIT1    | 2.39026  | 1.343426 | 1.723977728 | 0.636021 | 0.65489359 |
| YER054c | GIP2    | 2.381409 | 4.400847 | 1.755536049 | 2.392644 | 2.03490778 |
| YJL079c | PRY1    | 2.362459 | 3.266116 | 2.50379012  | 1.655875 | 2.57586248 |
| YLR178c | TFS1    | 2.351856 | 3.546264 | 2.100348724 | 0.837153 | 0.80547148 |
| YPR127w | YPR127w | 2.345163 | 1.537179 | 2.103650816 | 1.013361 | 0.83216498 |
| YDL055c | PSA1    | 2.338249 | 1.180555 | 3.602886291 | 0.798824 | 0.85369107 |
| YLL062c | MHT1    | 2.337995 | 0.672602 | 0.186935373 | 0.212239 | 0.22170324 |
| YBR010w | HHT1    | 2.330417 | 2.174929 | 2.161124601 | 0.872005 | 0.98604223 |
| YML004c | GLO1    | 2.325236 | 2.830589 | 1.525032455 | 1.183819 | 1.13195052 |
| YDR453c | TSA2    | 2.302636 | 2.07945  | 3.169893645 | 0.931149 | 0.7094786  |
| YLR090w | XDJ1    | 2.298157 | 1.134757 | 0.554176955 | 1.214804 | 0.823494   |
| YBR140c | IRA1    | 2.282571 | 1.46286  | 2.038215439 | 1.47739  | 1.72478757 |
| YFL030w | AGX1    | 2.281115 | 5.12699  | 2.224820794 | 2.076072 | 2.15012474 |
| YHR074w | QNS1    | 2.277172 | 1.410126 | 1.142450689 | 1.981713 | 1.97816561 |
| YBR141c | YBR141c | 2.276666 | 1.361435 | 2.060898765 | 1.135583 | 1.27390759 |
| YGR248w | SOL4    | 2.270455 | 4.905079 | 3.246019349 | 1.525438 | 1.36141601 |
| YDR542w | YDR542w | 2.265389 | 2.173432 | 1.45429345  | 0.785836 | 0.90269734 |
| YDR134c | YDR134c | 2.260021 | 2.390558 | 1.780342495 | 1.279782 | 1.30128659 |
| YLR110c | CCW12   | 2.241014 | 1.689335 | 1.545064149 | 0.939025 | 1.02623783 |
| YIL136w | OM45    | 2.239376 | 5.225072 | 2.128380182 | 1.30453  | 1.3466631  |
| YNL015w | PBI2    | 2.236553 | 1.838197 | 1.882095233 | 0.743421 | 0.51041514 |
| YDR161w | YDR161w | 2.232029 | 5.185617 | 1.405907235 | 2.492143 | 2.70020952 |
| YGL209w | MIG2    | 2.215438 | 0.991381 | 0.510900519 | 1.012697 | 0.86309678 |

|         |         |          |          |             |          |            |
|---------|---------|----------|----------|-------------|----------|------------|
| YGL121c | GPG1    | 2.214196 | 1.565656 | 2.153799649 | 0.543687 | 0.48272566 |
| YPL225w | YPL225w | 2.20723  | 0.904764 | 1.368735522 | 0.97995  | 0          |
| YIL119c | RPI1    | 2.207044 | 1.589188 | 2.394543773 | 0.437613 | 0.34058543 |
| YER124c | DSE1    | 2.197286 | 2.796247 | 3.002566965 | 1.136356 | 0.99944624 |
| YGL254w | FZF1    | 2.194925 | 0.628562 | 0.503539885 | 0.597395 | 0.54091981 |
| YLR186w | EMG1    | 2.167933 | 0.580149 | 0.696322662 | 0.940332 | 1.0203458  |
| YKL106w | AAT1    | 2.165341 | 0.600791 | 0.492960008 | 1.237866 | 1.03273916 |
| YNL194c | YNL194c | 2.158518 | 2.501361 | 1.174279507 | 1.188769 | 1.14227096 |
| YDL022w | GPD1    | 2.149642 | 2.474939 | 2.102172065 | 0.865862 | 0.72183635 |
| YNR001c | CIT1    | 2.142075 | 2.400429 | 1.812487317 | 1.45573  | 1.27968877 |
| YJL196c | ELO1    | 2.140823 | 2.05292  | 2.011072245 | 1.146154 | 1.1840416  |
| YGL205w | POX1    | 2.137612 | 2.384669 | 1.375322032 | 1.795762 | 1.96355984 |
| YAL068c | YAL068c | 2.136732 | 2.140795 | 1.630553661 | 0.93467  | 1.05328162 |
| YDR060w | MAK21   | 2.132413 | 1.114247 | 1.091708233 | 1.448459 | 1.90318151 |
| YGR008c | STF2    | 2.129444 | 2.002936 | 2.844366217 | 0.65374  | 0.60191464 |
| YNL217w | YNL217w | 2.116966 | 1.128434 | 2.568982287 | 1.843704 | 1.99235707 |
| YNL200c | YNL200c | 2.114339 | 3.408514 | 2.691365764 | 0.903946 | 0.78740705 |
| YKL156w | RPS27a  | 2.105385 | 0.558372 | 1.256871813 | 1.177103 | 0.96108024 |
| YBL064c | PRX1    | 2.098789 | 2.577081 | 2.260126983 | 0.876931 | 0.73868443 |
| YBR008c | FLR1    | 2.078724 | 2.713185 | 1.951499054 | 1.043663 | 1.12709645 |
| YOR142w | LSC1    | 2.074371 | 2.456989 | 1.450757378 | 2.140504 | 2.05828949 |
| YDL070w | BDF2    | 2.072412 | 1.345516 | 1.577470905 | 1.034874 | 1.13035083 |
| YLR049c | YLR049c | 2.06669  | 3.365074 | 2.961840473 | 1.128722 | 1.09296409 |
| YMR174c | PAI3    | 2.061975 | 2.54975  | 1.730856593 | 0.723048 | 0.70534808 |
| YMR173w | DDR48   | 2.056721 | 1.074384 | 2.308039657 | 0.767697 | 0.58048001 |
| YLR326w | YLR326w | 2.055564 | 1.029156 | 0.584656845 | 0.809478 | 0.80834366 |
| YMR184w | ADD37   | 2.054464 | 1.039993 | 1.878964338 | 0.684062 | 0.54434012 |
| YIL045w | PIG2    | 2.048813 | 1.908715 | 1.981363141 | 1.294943 | 1.18373856 |
| YDR356w | SPC110  | 2.047018 | 1.83466  | 1.315448703 | 1.323984 | 1.35885533 |
| YBL003c | HTA2    | 2.039541 | 1.496541 | 2.961880855 | 2.534722 | 1.32653039 |
| YMR145c | NDE1    | 2.034342 | 1.986048 | 1.437149858 | 2.124666 | 2.06772445 |
| YGR283c | YGR283c | 2.030953 | 0.577387 | 0.532972767 | 0.799208 | #N/A       |
| YHR160c | PEX18   | 2.014864 | 6.897946 | 1.427668401 | 1.278716 | 1.6442702  |
| YPL177c | CUP9    | 2.005219 | 0.826419 | 0.464770934 | 1.321123 | 1.06667398 |
| YLL061w | MMP1    | 2.002161 | 0.508657 | 0.280576039 | 0.590092 | 0.55335992 |
| YER106w | MAM1    | 1.992663 | 1.195018 | 1.093250626 | 0.819512 | 0.82778894 |
| YBR158w | AMN1    | 1.988105 | 1.455934 | 1.786272836 | 0.799714 | 0.91646392 |

|         |         |          |          |             |          |            |
|---------|---------|----------|----------|-------------|----------|------------|
| YMR081c | ISF1    | 1.987956 | 5.522883 | 2.70051012  | 2.862971 | 1.86133375 |
| YNL192w | CHS1    | 1.9855   | 1.04545  | 0.727216274 | 0.995101 | 1.03191077 |
| YOR010c | TIR2    | 1.98473  | 1.465019 | 2.343151244 | 1.015557 | 1.24859973 |
| YPL147w | PXA1    | 1.980998 | 3.397656 | 1.668942858 | 1.353325 | 1.73854815 |
| YMR250w | GAD1    | 1.977644 | 4.552687 | 4.027569292 | 2.132223 | 1.99488706 |
| YJL012c | VTC4    | 1.974553 | 1.330745 | 1.972848464 | 3.977054 | 4.08351535 |
| YOL162w | YOL162w | 1.971206 | 0.685205 | 0.269263753 | 0.391199 | 0.373205   |
| YLR414c | YLR414c | 1.964872 | 1.505239 | 1.463501981 | 0.848185 | 0.85405431 |
| YDR047w | HEM12   | 1.959541 | 2.123263 | 1.563607708 | 1.101249 | 1.42186442 |
| YGR254w | ENO1    | 1.956222 | 1.043925 | 1.875470402 | 1.223765 | 1.10317088 |
| YMR107w | SPG4    | 1.956035 | 10.67242 | 3.236858671 | 1.545563 | 1.63016661 |
| YGL261c | YGL261c | 1.943877 | 1.410122 | 1.375712554 | 0.807103 | 0.87480924 |
| YHR139c | SPS100  | 1.943437 | 2.158565 | 1.435715283 | 1.398808 | 1.26237782 |
| YKR076w | ECM4    | 1.928911 | 2.818316 | 1.974911233 | 1.251961 | 1.19097017 |
| YDR070c | FMP16   | 1.928603 | 5.433289 | 2.645454225 | 1.345299 | 1.37490039 |
| YJR079w | YJR079w | 1.927854 | 1.307666 | 1.195631533 | 0.914292 | 1.01048609 |
| YMR173w | DDR48   | 1.92606  | 1.069294 | 2.60368725  | 1.013432 | 0.66150105 |
| YDL179w | PCL9    | 1.919813 | 2.180344 | 1.864561117 | 0.888928 | 0.87839914 |
| YFL029c | CAK1    | 1.919072 | 2.00068  | 1.519521652 | 1.177221 | 1.15674151 |
| YIL135c | VHS2    | 1.914089 | 1.810269 | 0.90497569  | 0.870279 | 0          |
| YOR248w | YOR248w | 1.907782 | 1.760492 | 1.778870992 | 0.501132 | 0.55938283 |
| YER037w | PHM8    | 1.905434 | 0.803291 | 2.102430191 | 0.842388 | 0.8320045  |
| YEL049w | PAU2    | 1.902631 | 1.61204  | 1.537145202 | 0.835561 | 0.94479856 |
| YOR009w | TIR4    | 1.895468 | 0.965078 | 2.439410489 | 1.15586  | 0.93521177 |
| YLR040c | YLR040c | 1.881503 | 0.763061 | 0.790957499 | 0.586129 | 0.68081706 |
| YKL093w | MBR1    | 1.876971 | 3.397481 | 2.20558661  | 1.393621 | 1.49143517 |
| YBL086c | YBL086c | 1.876232 | 0.61231  | 1.345962933 | 1.110499 | 0.99056421 |
| YOL086c | ADH1    | 1.872959 | 1.691157 | 2.343827564 | 1.268237 | 1.10979263 |
| YKL107w | YKL107w | 1.872406 | 1.922228 | 1.180930524 | 1.096029 | 1.05744929 |
| YBR301w | DAN3    | 1.870639 | 1.586763 | 1.45351229  | 0.828932 | 0.79640225 |
| YPL272c | YPL272c | 1.866803 | 0.7964   | 1.969962685 | 0.974662 | 0.92010199 |
| YBL015w | ACH1    | 1.865663 | 3.692733 | 2.60740984  | 1.28817  | 1.64673991 |
| YBR117c | TKL2    | 1.864881 | 6.282054 | 2.355961981 | 2.259014 | 2.42089896 |
| YBL002w | HTB2    | 1.864032 | 1.822052 | 1.783173253 | 1.413365 | 1.34335811 |
| YKL006w | RPL14a  | 1.861758 | 0.58413  | 1.516751149 | 0.962311 | 0.94636631 |
| YOR264w | DSE3    | 1.85667  | 1.81291  | 2.077536908 | 1.07013  | 0.98693252 |
| YDL020c | RPN4    | 1.853    | 2.66369  | 1.495679492 | 2.288722 | 2.45984547 |

|         |         |          |          |             |          |            |
|---------|---------|----------|----------|-------------|----------|------------|
| YHR033w | YHR033w | 1.845972 | 4.297895 | 2.094934786 | 2.335517 | 1.68437513 |
| YGL055w | OLE1    | 1.844689 | 1.17422  | 1.258440571 | 0.96512  | 0.95063549 |
| YKL066w | YKL066w | 1.844049 | 1.207024 | 1.588629688 | 0.594181 | 0.51481466 |
| YGR146c | YGR146c | 1.838923 | 2.990266 | 1.107648999 | 1.015329 | 0.98502779 |
| YBR071w | YBR071w | 1.838433 | 2.187147 | 1.510739527 | 1.001012 | 1.00992182 |
| YJL142c | YJL142c | 1.833799 | 3.283594 | 1.207462497 | 1.085323 | 1.17937187 |
| YNR002c | ATO2    | 1.832173 | 6.335502 | 1.601777918 | 2.396785 | 2.55807891 |
| YJR085c | YJR085c | 1.8255   | 1.16153  | 1.169366284 | 0.617842 | 0.57517366 |
| YMR099c | YMR099c | 1.82471  | 0.507635 | 1.090165177 | 0.803511 | 0.71085888 |
| YBR050c | REG2    | 1.812872 | 2.853777 | 1.879868797 | 1.18576  | 1.16044127 |
| YHR185c | PFS1    | 1.811356 | 1.850003 | 1.474463319 | 1.19929  | 1.21914692 |
| YLR151c | PCD1    | 1.80712  | 2.372875 | 1.686286229 | 1.208581 | 1.52141645 |
| YBR053c | YBR053c | 1.803423 | 0.90279  | 1.569620656 | 1.280626 | 1.2362046  |
| YCL040w | GLK1    | 1.802202 | 4.187835 | 1.739900559 | 1.057006 | 1.08038474 |
| YHR053c | CUP1-1  | 1.793956 | 1.382459 | 1.745829032 | 0.210997 | 0.25793809 |
| YGR205w | YGR205w | 1.789054 | 1.808165 | 2.047141715 | 0.893515 | 0.90100181 |
| YGR189c | CRH1    | 1.787672 | 1.564189 | 2.660712088 | 1.758313 | 1.84016    |
| YDR357c | YDR357c | 1.787267 | 1.578287 | 1.626143233 | 0.688604 | 0.71442437 |
| YEL046c | GLY1    | 1.785407 | 1.067542 | 0.381920287 | 2.019793 | 2.62562079 |
| YPL186c | UIP4    | 1.779301 | 2.395416 | 1.510252222 | 1.015913 | 0.98181408 |
| YJL161w | FMP33   | 1.778885 | 1.723438 | 1.47439551  | 0.571988 | 0.51240591 |
| YIR038c | GTT1    | 1.77597  | 1.546144 | 1.82384634  | 0.754823 | 0.66404455 |
| YJL054w | TIM54   | 1.77399  | 1.049876 | 2.094207279 | 0.713533 | 0.56150905 |
| YJR096w | YJR096w | 1.773557 | 2.032814 | 2.332471536 | 0.947645 | 1.07284721 |
| YOL151w | GRE2    | 1.761395 | 2.456657 | 2.053209416 | 0.737773 | 0.63600833 |
| YMR202w | ERG2    | 1.76027  | 0.53912  | 1.294860829 | 1.423058 | 1.43856702 |
| YLR043c | TRX1    | 1.760189 | 0.608979 | 1.889587242 | 0.609961 | 0.58190093 |
| YOL083w | YOL083w | 1.757589 | 2.306525 | 1.798366257 | 1.196725 | 1.07366653 |
| YCR021c | HSP30   | 1.755439 | 1.361644 | 2.347727271 | 0.387393 | 0.49286469 |
| YDR022c | CIS1    | 1.755081 | 1.585598 | 1.873914446 | 0.633397 | 0.69150141 |
| YDR448w | ADA2    | 1.754058 | 2.304785 | 0.619545852 | 2.282807 | 1.80694892 |
| YBL087c | RPL23a  | 1.75242  | 0.339108 | 1.396558076 | 0.810191 | #N/A       |
| YMR040w | YET2    | 1.751718 | 1.212421 | 1.493633065 | 0.481113 | 0.43024552 |
| YLR286c | CTS1    | 1.751267 | 1.721907 | 2.352462008 | 0.825551 | 0          |
| YGR138c | TPO2    | 1.749043 | 0.468564 | 1.231737792 | 1.419417 | 1.81098306 |
| YEL011w | GLC3    | 1.747807 | 3.259622 | 2.420687941 | 2.0196   | 2.1979824  |
| YGR051c | YGR051c | 1.747197 | 2.503203 | 1.688959076 | 1.324079 | 1.28849614 |

|         |         |          |          |             |          |            |
|---------|---------|----------|----------|-------------|----------|------------|
| YDR368w | YPR1    | 1.74498  | 1.035056 | 2.22003202  | 0.702423 | 0.54521163 |
| YGR182c | YGR182c | 1.737435 | 1.953127 | 1.521469741 | 0.980852 | 1.09034388 |
| YJL020c | BBC1    | 1.73604  | 2.404002 | 1.062947409 | 1.204728 | 1.35036899 |
| YJL223c | PAU1    | 1.735141 | 1.953629 | 1.47925085  | 1.14356  | 0.80229518 |
| YDR157w | YDR157w | 1.73187  | 1.061482 | 1.143742568 | 0.584384 | 0.68076597 |
| YHR143w | DSE2    | 1.730124 | 1.227074 | 1.53782738  | 0.492923 | 0.58814728 |
| YML054c | CYB2    | 1.729761 | 3.992036 | 2.188477944 | 1.907057 | 2.27429118 |
| YLR257w | YLR257w | 1.724907 | 1.59881  | 2.028881014 | 1.23681  | 1.28878642 |
| YJR095w | SFC1    | 1.724388 | 2.737405 | 1.668010536 | 1.16636  | 1.74958403 |
| YGR059w | SPR3    | 1.724167 | 2.218442 | 1.326052696 | 1.385946 | 1.15809243 |
| YOL109w | ZEO1    | 1.719024 | 1.019134 | 1.386473658 | 0.603789 | 0.50600155 |
| YGR183c | QCR9    | 1.713035 | 2.094858 | 1.72792819  | 1.14271  | 0.98113341 |
| YOL084w | PHM7    | 1.710325 | 4.873983 | 1.914684977 | 1.106671 | 1.14531855 |
| YLR258w | GSY2    | 1.708573 | 3.231947 | 1.655967349 | 1.29178  | 1.47174918 |
| YPR160w | GPH1    | 1.702778 | 3.874703 | 2.262140217 | 1.346727 | 1.35017389 |
| YJL016w | YJL016w | 1.695386 | 3.103738 | 1.613286496 | 1.140288 | 1.0348358  |
| YPL123c | RNY1    | 1.688443 | 2.037127 | 2.319367761 | 1.105277 | 1.03343437 |
| YHR126c | YHR126c | 1.687636 | 2.489531 | 1.695695147 | 0.979781 | 1.11950376 |
| YER064c | YER064c | 1.6857   | 2.527822 | 1.061720821 | 4.093327 | 2.87596797 |
| YNL009w | IDP3    | 1.678607 | 4.335777 | 2.150105187 | 1.849432 | 1.82263488 |
| YDL075w | RPL31a  | 1.677416 | 0.47813  | 1.488409306 | 0.719662 | 0.7509921  |
| Unknown | Unknown | 1.677382 | 1.633216 | 1.901301668 | 0.906337 | 0.9530727  |
| YHR007c | ERG11   | 1.673662 | 0.681025 | 2.439865073 | 3.726633 | 2.84889849 |
| YKL185w | ASH1    | 1.672785 | 3.048559 | 2.374199202 | 1.198675 | 1.20080419 |
| YGL162w | SUT1    | 1.671415 | 2.020917 | 0.705606853 | 2.053144 | 0          |
| YBR088c | POL30   | 1.671329 | 1.270759 | 2.103841912 | 1.034994 | 1.11032506 |
| YOR120w | GCY1    | 1.668153 | 2.597391 | 1.829388762 | 1.319706 | 1.24570827 |
| YOR342c | YOR342c | 1.668059 | 1.721425 | 1.726582397 | 1.179568 | 1.38909858 |
| YML123c | PHO84   | 1.665963 | 0.879751 | 1.673153789 | 2.72884  | 2.39407148 |
| YMR105c | PGM2    | 1.664975 | 4.950083 | 2.583359626 | 1.975851 | 1.30568619 |
| YOR374w | ALD4    | 1.663947 | 3.820771 | 1.852771936 | 3.081019 | 2.64693144 |
| YDL170w | UGA3    | 1.660844 | 0.791163 | 0.333802351 | 1.506747 | 1.65769121 |
| YGR130c | YGR130c | 1.659977 | 3.341921 | 1.191329954 | 1.718281 | 1.6975826  |
| YMR236w | TAF9    | 1.658696 | 0.630027 | 0.547262272 | 0.598634 | 0.76518646 |
| YBR090c | YBR090c | 1.657317 | 2.247064 | 1.315203866 | 0.816845 | 0.65242143 |
| YLR238w | FAR10   | 1.656869 | 0.604254 | 1.253530082 | 0.799253 | #N/A       |
| YHR097c | YHR097c | 1.64775  | 2.885283 | 1.759798413 | 1.164334 | 1.18932165 |



|         |         |          |          |             |          |            |
|---------|---------|----------|----------|-------------|----------|------------|
| YOR173w | DCS2    | 1.647728 | 2.811513 | 2.252406915 | 1.01555  | 0.9201343  |
| YBR026c | ETR1    | 1.646439 | 2.308656 | 2.16040124  | 1.625365 | 1.37696761 |
| YKL117w | SBA1    | 1.645176 | 1.225646 | 2.108985018 | 0.672035 | 0.5804458  |
| YHL032c | GUT1    | 1.643063 | 2.375927 | 1.233429457 | 1.844375 | 1.76430152 |
| YDR451c | YHP1    | 1.642732 | 2.122193 | 1.365351599 | 1.412496 | 1.32899282 |
| YNL036w | NCE103  | 1.64046  | 4.046441 | 1.378350224 | 4.698894 | 4.72971443 |
| YPR035w | GLN1    | 1.637982 | 0.48737  | 0.664519104 | 1.393723 | 1.59777111 |
| YDR251w | PAM1    | 1.636335 | 0.76676  | 0.565781678 | 0.85636  | 0.89410938 |
| YBL043w | ECM13   | 1.63313  | 2.213124 | 1.489442905 | 1.096721 | 0.97389277 |
| YCL049c | YCL049c | 1.631446 | 1.022214 | 0.888382608 | 0.615692 | #N/A       |
| YEL040w | UTR2    | 1.630719 | 0.697661 | 1.273434732 | 2.15439  | 2.13307241 |
| YHR140w | YHR140w | 1.630369 | 2.922307 | 1.446795849 | 0.924567 | 1.12461038 |
| YJR121w | ATP2    | 1.6294   | 2.490634 | 1.273944821 | 1.992619 | 2.13664126 |
| YIL152w | YIL152w | 1.619897 | 1.630323 | 1.260177109 | 1.481245 | 1.89291534 |
| YNL066w | SUN4    | 1.618349 | 1.232571 | 2.212354964 | 1.028399 | 1.17337621 |
| YKL164c | PIR1    | 1.611929 | 3.308734 | 1.620691508 | 1.712924 | 1.58330724 |
| YLR109w | AHP1    | 1.60986  | 0.937971 | 1.467484598 | 0.508333 | 0.4016072  |
| YJR103w | URA8    | 1.608787 | 1.820949 | 1.728871869 | 0.796482 | 0.98940179 |
| YLR327c | TMA10   | 1.607794 | 2.050168 | 1.348317965 | 1.428298 | 1.04587572 |
| YDR048c | YDR048c | 1.607458 | 1.818088 | 1.273472043 | 1.22811  | 1.32741658 |
| YPR036w | VMA13   | 1.606058 | 0.768544 | 1.722769734 | 2.027746 | 2.11920909 |
| YJL116c | NCA3    | 1.603554 | 5.704016 | 1.118533955 | 1.991761 | 2.3568895  |
| YIR043c | YIR043c | 1.594993 | 1.195231 | 1.263840782 | 0.704366 | 0.5989004  |
| YDL246c | SOR2    | 1.594846 | 1.202079 | 1.758253844 | 0.308455 | 0.26403861 |
| YBR085w | AAC3    | 1.594744 | 3.037267 | 1.737088308 | 0.937134 | 1.32838118 |
| YDL222c | FMP45   | 1.586948 | 5.170061 | 1.800911598 | 1.098506 | 1.32353654 |
| YGR192c | TDH3    | 1.584949 | 0.936829 | 2.395863149 | 1.012786 | 0.77147028 |
| YBL092w | RPL32   | 1.583908 | 0.450351 | 1.248251719 | 0.768397 | 0.94015275 |
| YJL017w | YJL017w | 1.581929 | 2.563587 | 1.546505111 | 1.346431 | 1.14369557 |
| YBR183w | YPC1    | 1.581663 | 1.273109 | 1.544452323 | 0.431373 | 0.42486238 |
| YDL181w | INH1    | 1.577015 | 1.954267 | 1.376375984 | 1.23096  | 1.19220644 |
| YOR236w | DFR1    | 1.573985 | 0.679442 | 0.692179689 | 0.652141 | #N/A       |
| YBR281c | DUG2    | 1.56667  | 1.175339 | 1.448091771 | 0.321245 | 0.35711182 |
| YMR297w | PRC1    | 1.565866 | 1.795262 | 1.592210675 | 1.664156 | 1.88039286 |
| YKL035w | UGP1    | 1.556963 | 3.66337  | 2.504763247 | 2.016624 | 1.8300286  |
| YGL259w | YPS5    | 1.55276  | 1.920709 | 1.559001792 | 1.224185 | 1.20266372 |
| YDR540c | IRC4    | 1.550623 | 0.770653 | 1.173257712 | 0.559895 | 0.66299652 |

|           |         |          |          |             |          |            |
|-----------|---------|----------|----------|-------------|----------|------------|
| YFR033c   | QCR6    | 1.543055 | 2.1724   | 1.363622914 | 0.882649 | 0.82024002 |
| YBR066c   | NRG2    | 1.529014 | 0.604708 | 1.01354228  | 1.171431 | 0.68058637 |
| YGR086c   | PIL1    | 1.527741 | 4.236745 | 2.050850827 | 1.09688  | 0.98014116 |
| YER177w   | BMH1    | 1.523862 | 1.153145 | 1.759546565 | 0.868347 | 0.75735246 |
| YOR333c   | YOR333c | 1.522105 | 2.039201 | 1.105503262 | 1.178268 | 1.04740573 |
| YIL114c   | POR2    | 1.515578 | 1.039441 | 0.685769928 | 0.628143 | 0.93394024 |
| YBR295w   | PCA1    | 1.514757 | 2.838973 | 1.434284638 | 1.031309 | 0.97600811 |
| YDR399w   | HPT1    | 1.512095 | 0.940331 | 0.473823432 | 1.503689 | #N/A       |
| YGL037c   | PNC1    | 1.511927 | 2.189892 | 1.866525577 | 1.043385 | 0.83195873 |
| YIL162w   | SUC2    | 1.511342 | 6.694078 | 1.049133356 | 3.036621 | 2.44334352 |
| YCR005c   | CIT2    | 1.509551 | 2.257381 | 1.94616416  | 0.594884 | 0.69629057 |
| YGL028c   | SCW11   | 1.508926 | 1.505651 | 2.353010817 | 0.84278  | 0.87150367 |
| YNL067w   | RPL9b   | 1.502457 | 0.5493   | 1.467954406 | 0.879248 | 1.02773723 |
| YIL167w   | SDL1    | 1.502029 | 1.098929 | 1.470116856 | 0.578895 | 0.42901912 |
| YKL091c   | YKL091c | 1.498693 | 2.883286 | 1.19828572  | 0.881971 | 0.869315   |
| YDR202c   | RAV2    | 1.497248 | 1.668101 | 2.017717312 | 1.248153 | 0.94876138 |
| YDL010w   | GRX6    | 1.495548 | 1.626014 | 1.39143488  | 0.667895 | 0.59288757 |
| YJL063c   | MRPL8   | 1.49539  | 1.036637 | 1.127486931 | 0.638511 | 0.86303926 |
| YOR099w   | KTR1    | 1.493243 | 1.298265 | 1.830833878 | 1.524769 | 1.29626745 |
| YJR048w   | CYC1    | 1.491509 | 2.295174 | 1.444825916 | 0.878359 | 1.0623804  |
| YIL153w   | RRD1    | 1.490612 | 2.287726 | 1.309317885 | 1.208126 | 1.68277407 |
| YBR039w   | ATP3    | 1.487829 | 1.788745 | 2.199411395 | 1.641808 | 1.67029776 |
| YDR074w   | TPS2    | 1.484801 | 3.470713 | 1.385531349 | 2.513272 | 2.77884607 |
| YKL163w   | PIR3    | 1.483697 | 3.196091 | 1.558760408 | 2.664647 | 2.15295786 |
| YOR028c   | CIN5    | 1.482681 | 5.161668 | 1.449421086 | 1.603256 | 1.81995149 |
| YCR050c   | YCR050c | 1.482659 | 2.049912 | 1.883708612 | 0.657247 | 0.79942846 |
| YHR055c   | CUP1-2  | 1.480369 | 1.399467 | 1.596658917 | 0.287111 | 0.35613369 |
| YIL134w   | FLX1    | 1.479613 | 0.767491 | 0.73353082  | 0.524862 | 0.59478765 |
| YHL050c   | YHL050c | 1.475559 | 2.088783 | 1.148936347 | 0.892107 | 1.12783312 |
| YDR447c   | RPS17b  | 1.474243 | 0.445243 | 1.217398663 | 0.834787 | 0.92290159 |
| YBR182c   | SMP1    | 1.474002 | 1.22314  | 1.433769147 | 0.419876 | 0.42368069 |
| YER053c   | PIC2    | 1.472419 | 1.971958 | 1.939833665 | 0.704898 | 0.65512975 |
| YBR094w   | PBY1    | 1.468722 | 2.242328 | 1.991540003 | 1.406432 | 1.38240669 |
| YER152c   | YER152c | 1.466604 | 2.39936  | 1.681895588 | 1.311458 | 1.63326801 |
| YDL220c   | CDC13   | 1.464588 | 1.289817 | 1.406126303 | 0.657506 | 0.57105682 |
| YDR179W-A | Unknown | 1.460808 | 2.048891 | 1.229079069 | 1.164943 | 1.30306177 |
| YNL259c   | ATX1    | 1.459878 | 0.524412 | 0.98918386  | 0.495944 | 0.52860088 |

|         |         |          |          |             |          |            |
|---------|---------|----------|----------|-------------|----------|------------|
| YFL054c | YFL054c | 1.459681 | 3.746122 | 1.254953538 | 1.944641 | 2.14298313 |
| YDL136w | RPL35b  | 1.458469 | 0.421576 | 1.281258809 | 0.802216 | 0.80272143 |
| YDL215c | GDH2    | 1.4564   | 2.333071 | 0.838586797 | 1.739969 | 1.5296037  |
| YOR096w | RPS7a   | 1.451764 | 0.520985 | 1.56692581  | 0.953111 | 0.85998702 |
| YJR092w | BUD4    | 1.445598 | 1.706929 | 1.338513767 | 1.13104  | 1.09599436 |
| YBR214w | SDS24   | 1.443583 | 3.212656 | 1.768772144 | 1.764232 | 1.80499091 |
| YMR009w | ADI1    | 1.437982 | 0.425212 | 0.364888657 | 0.923558 | #N/A       |
| YKR075c | YKR075c | 1.436435 | 1.141147 | 0.513134896 | 1.211298 | #N/A       |
| YGL001c | ERG26   | 1.434479 | 0.525126 | 1.462871146 | 1.037963 | 0.98624457 |
| YGR067c | YGR067c | 1.434007 | 5.456876 | 1.840611592 | 3.288761 | 4.249655   |
| YOR381w | FRE3    | 1.432646 | 0.808935 | 0.961221919 | 0.495456 | 0.4803301  |
| YKL090w | CUE2    | 1.431737 | 1.732322 | 1.286066493 | 1.534086 | 1.494567   |
| YLR264w | RPS28b  | 1.431591 | 0.596472 | 1.307312    | 0.781672 | 0.66680555 |
| YDR438w | THI74   | 1.43103  | 2.378198 | 1.765449895 | 0.92213  | 0.77736995 |
| YDR504c | SPG3    | 1.429289 | 1.863002 | 0.96866518  | 0.955558 | 0.90417748 |
| YFL066c | YFL066c | 1.429212 | 2.028366 | 1.182713322 | 0.895066 | 1.00779962 |
| YCL042w | YCL042w | 1.429178 | 2.407849 | 1.451645666 | 1.128243 | 1.11731577 |
| YHR219w | YHR219w | 1.423347 | 2.794756 | 1.490865607 | 1.172366 | 1.37669654 |
| YJL066c | MPM1    | 1.421858 | 1.849132 | 1.25532074  | 0.798925 | 0.854265   |
| YOL127w | RPL25   | 1.415818 | 0.523055 | 1.364473797 | 0.699316 | 0.72511093 |
| YNL024c | YNL024c | 1.415461 | 0.54432  | 1.028051068 | 0.511227 | 0.61086911 |
| YMR291w | YMR291w | 1.414563 | 3.100494 | 1.147388069 | 1.726602 | 1.68591404 |
| YDR073w | SNF11   | 1.41405  | 2.269743 | 1.250173067 | 1.060137 | 0.94380685 |
| YHR008c | SOD2    | 1.412304 | 1.927708 | 1.602499848 | 0.821096 | 0.84472429 |
| YKL085w | MDH1    | 1.411301 | 2.097343 | 1.940783485 | 1.040066 | 0.88421381 |
| YDL223c | HBT1    | 1.408632 | 3.583505 | 1.398505167 | 1.283066 | 1.3929666  |
| YMR118c | YMR118c | 1.408257 | 3.490095 | 1.329216442 | 1.439825 | 1.29504534 |
| YGL096w | TOS8    | 1.406431 | 1.889938 | 1.302844493 | 0.575614 | 0.65557561 |
| YPR149w | NCE102  | 1.40169  | 4.523974 | 2.437331574 | 1.417331 | 1.06551098 |
| YLR395c | COX8    | 1.39947  | 1.710214 | 1.748788541 | 0.948983 | 0.77108301 |
| YNL111c | CYB5    | 1.399091 | 0.602232 | 1.397409185 | 1.143583 | 0.9456675  |
| YOR065w | CYT1    | 1.396709 | 2.48029  | 1.972264365 | 1.873942 | 1.76936277 |
| YMR158w | MRPS8   | 1.392722 | 1.015787 | 0.786943775 | 0.613886 | 0.61364741 |
| YKR049c | FMP46   | 1.392392 | 1.919755 | 1.439147777 | 0.707492 | 0.57675323 |
| YJL042w | MHP1    | 1.391618 | 1.370798 | 1.465092199 | 0.686934 | 0.59370552 |
| YDR490c | PKH1    | 1.389339 | 1.983292 | 1.035321814 | 1.727015 | 1.69433149 |
| YMR051c | YMR051c | 1.387362 | 0.602136 | 0.508048523 | 0.817329 | 1.01800479 |

|         |         |          |          |             |          |            |
|---------|---------|----------|----------|-------------|----------|------------|
| YJL141c | YAK1    | 1.385842 | 2.707752 | 1.655985693 | 1.980248 | 2.10182732 |
| YBR126c | TPS1    | 1.385242 | 3.247289 | 1.833451852 | 1.382595 | 1.34438365 |
| YER044c | ERG28   | 1.382891 | 0.711849 | 1.83268796  | 1.271664 | 0.8166114  |
| YML009c | MRPL39  | 1.381279 | 0.901881 | 1.098539695 | 0.639407 | 0.57753221 |
| YCL058c | FYV5    | 1.37804  | 1.205531 | 1.143155111 | 0.672355 | 0.61699371 |
| YOR074c | CDC21   | 1.376555 | 1.239537 | 2.173689111 | 0.859764 | 0.82977368 |
| YMR087w | YMR087w | 1.376412 | 2.812221 | 1.640367128 | 1.03338  | 0.96792335 |
| YMR195w | ICY1    | 1.375446 | 2.162528 | 1.328695751 | 1.867409 | 1.4776636  |
| YDR480w | DIG2    | 1.372055 | 2.187761 | 1.687789639 | 1.30033  | 1.2336082  |
| YDR025w | RPS11a  | 1.369937 | 0.441865 | 1.149244503 | 0.817877 | 0.92756801 |
| YLR350w | ORM2    | 1.367701 | 2.028156 | 1.752494784 | 0.803201 | 0.7671118  |
| YCL025c | AGP1    | 1.365491 | 1.600854 | 1.269317404 | 1.965966 | 1.85126402 |
| YLR118c | YLR118c | 1.364144 | 0.847719 | 1.506957322 | 0.689384 | 0.59666968 |
| YDR266c | YDR266c | 1.363431 | 2.675582 | 1.254801431 | 0.966221 | 1.07998473 |
| YOR238w | YOR238w | 1.362376 | 0.57398  | 0.71989894  | 0.969956 | #N/A       |
| YKL067w | YNK1    | 1.361445 | 1.144941 | 1.758344964 | 0.831678 | 0.55276678 |
| YGR244c | LSC2    | 1.360038 | 1.86406  | 1.519406682 | 1.341403 | 1.44050983 |
| YML027w | YOX1    | 1.359861 | 1.314218 | 1.196344196 | 1.082189 | 1.02800866 |
| YBR230c | OM14    | 1.359248 | 3.880535 | 1.707086139 | 1.242473 | 1.12848931 |
| YBR222c | PCS60   | 1.358699 | 1.756761 | 1.288668884 | 0.819776 | 1.05998137 |
| YDR449c | UTP6    | 1.358398 | 0.833628 | 0.93155798  | 1.720442 | 1.96992069 |
| YBL078c | ATG8    | 1.355918 | 1.721338 | 1.390351087 | 0.85991  | 0.76242036 |
| YKL016c | ATP7    | 1.3551   | 1.30975  | 1.885565535 | 0.878458 | 0.78181697 |
| YNL010w | YNL010w | 1.355013 | 0.444324 | 1.458410097 | 0.888161 | 0.96435095 |
| YDR424c | DYN2    | 1.352672 | 0.931367 | 1.065968511 | 0.54847  | 0.49543205 |
| YAL034c | FUN19   | 1.351924 | 2.182356 | 1.219217331 | 1.217106 | 1.44694781 |
| YCR004c | YCP4    | 1.351108 | 2.08485  | 1.801312383 | 1.33854  | 1.329643   |
| YHR096c | HXT5    | 1.350493 | 3.268562 | 1.641989431 | 1.221771 | 1.03812758 |
| YFL060c | SNO3    | 1.349877 | 1.087646 | 1.264267843 | 0.612307 | 0.57408917 |
| YMR319c | FET4    | 1.342303 | 0.9422   | 1.772534921 | 1.763289 | 1.74455023 |
| YLR167w | RPS31   | 1.342093 | 0.505329 | 1.273335639 | 0.645789 | 0.68150439 |
| YKR071c | DRE2    | 1.341828 | 0.385546 | 0.212499619 | 0.980011 | #N/A       |
| YDR190c | RVB1    | 1.341455 | 1.282378 | 1.231639159 | 0.68462  | 0.58971    |
| YJR066w | TOR1    | 1.341332 | 2.297121 | 1.171696072 | 0.819781 | 0.92270582 |
| YNL334c | SNO2    | 1.340413 | 1.194071 | 1.402085065 | 0.577029 | 0.54720204 |
| YIR037w | HYR1    | 1.339271 | 1.363913 | 1.624407363 | 0.660822 | 0.51247956 |
| YOL129w | VPS68   | 1.339101 | 1.003051 | 1.364467055 | 0.732258 | 0.52499744 |

|          |         |          |          |             |          |            |
|----------|---------|----------|----------|-------------|----------|------------|
| YPR204w  | YPR204w | 1.330978 | 2.148497 | 1.110658132 | 0.813273 | 1.0469885  |
| YHR039BC | Unknown | 1.330277 | 0.584019 | 1.100759623 | 0.584746 | 0.54323578 |
| YMR206w  | YMR206w | 1.329198 | 3.106707 | 1.445711643 | 0.945299 | 1.04575022 |
| YNR036c  | MRPS12  | 1.326975 | 1.391459 | 1.33150092  | 0.656723 | 0.59464601 |
| YGL008c  | PMA1    | 1.326781 | 1.439663 | 1.565671928 | 3.444339 | 2.78549795 |
| YPR001w  | CIT3    | 1.32539  | 2.668891 | 1.253362333 | 1.729571 | 2.0849978  |
| YGR174c  | CBP4    | 1.324805 | 1.966144 | 1.54992789  | 0.654209 | 0.6644828  |
| YGR161c  | RTS3    | 1.324151 | 3.596859 | 1.067774019 | 2.201194 | 2.38995844 |
| YNL202w  | SPS19   | 1.322924 | 3.756872 | 1.389575315 | 1.320748 | 1.61237482 |
| YOL120c  | RPL18a  | 1.321409 | 0.648301 | 2.090773959 | 0.947051 | 0.94551821 |
| YMR041c  | ARA2    | 1.319854 | 2.055617 | 1.22791909  | 1.917096 | 1.97731124 |
| YKL081w  | TEF4    | 1.317413 | 0.725267 | 2.214923056 | 1.709994 | 1.70613129 |
| YJL220w  | YJL220w | 1.315302 | 0.898896 | 1.106242677 | 0.634481 | 0.54056499 |
| YDL184c  | RPL41a  | 1.314301 | 0.57874  | 1.28305707  | 0.788035 | 0.61843138 |
| YIL053w  | RHR2    | 1.312636 | 0.37971  | 0.934858659 | 1.069265 | 0.98218293 |
| YOR031w  | CRS5    | 1.312243 | 2.492412 | 1.72445986  | 0.793102 | 0.7515905  |
| YBL075c  | SSA3    | 1.311331 | 2.134209 | 1.812735041 | 0.92308  | 1.07386417 |
| YPR132w  | RPS23b  | 1.309046 | 0.590413 | 1.318917229 | 0.933921 | 0.8928213  |
| YNL300w  | TOS6    | 1.304432 | 1.889324 | 1.313645646 | 1.202838 | 1.0824827  |
| YIL043c  | CBR1    | 1.300763 | 0.68026  | 1.907064562 | 1.348371 | 0.93675381 |
| YEL026w  | SNU13   | 1.300528 | 0.42099  | 1.005345625 | 0.881374 | 0.99421004 |
| YNL213c  | YNL213c | 1.300095 | 1.169466 | 1.00676217  | 0.675281 | 0.63775463 |
| YDR343c  | HXT6    | 1.299614 | 2.693005 | 1.490642171 | 1.3393   | 1.45643102 |
| YDL191w  | RPL35a  | 1.299559 | 0.506608 | 1.304622515 | 0.720939 | 0.79355907 |
| YLR092w  | SUL2    | 1.291075 | 0.361397 | 0.196721248 | 0.604628 | 1.02916818 |
| YMR119w  | ASI1    | 1.290646 | 0.966119 | 0.889304745 | 0.689856 | 0.59140264 |
| YFR053c  | HXK1    | 1.287877 | 3.148521 | 2.005431998 | 1.95255  | 1.98387375 |
| YNL071w  | LAT1    | 1.287491 | 1.303875 | 2.444115045 | 2.074724 | 1.71715169 |
| YNL134c  | YNL134c | 1.287385 | 1.455778 | 1.968900721 | 0.920779 | 0.72177258 |
| YOR161c  | PNS1    | 1.287305 | 2.757446 | 1.284139527 | 1.559808 | 1.3092871  |
| YGR242w  | YGR242w | 1.287247 | 1.964987 | 1.295794214 | 1.282763 | 1.20018254 |
| YGL262w  | YGL262w | 1.285724 | 2.211379 | 1.176471733 | 1.117708 | 0.79365079 |
| YDR450w  | RPS18a  | 1.285031 | 0.441684 | 1.347282174 | 1.006796 | 1.08258262 |
| YLR333c  | RPS25b  | 1.284752 | 0.366801 | 1.433470282 | 0.713514 | 0.69648725 |
| YJL045w  | YJL045w | 1.284229 | 2.228225 | 1.680168571 | 0.953117 | 0.94781694 |
| YMR003w  | YMR003w | 1.283573 | 1.507649 | 1.395018367 | 1.468155 | 1.22217776 |
| YDR497c  | ITR1    | 1.283416 | 1.455952 | 1.032050207 | 2.120012 | 1.78813472 |

|         |         |          |          |             |          |            |
|---------|---------|----------|----------|-------------|----------|------------|
| YBR132c | AGP2    | 1.281481 | 2.015197 | 1.290074628 | 0.961475 | 0.99195504 |
| YOR273c | TPO4    | 1.281293 | 2.395131 | 1.352911531 | 1.279349 | 1.20968559 |
| YMR262w | YMR262w | 1.281149 | 1.878031 | 1.490247853 | 1.125122 | 0.98936865 |
| YGL163c | RAD54   | 1.280826 | 1.885127 | 0.848523103 | 1.918514 | 1.84827342 |
| YAR031w | PRM9    | 1.280459 | 1.008707 | 1.42944172  | 0.597572 | 0.56214974 |
| YMR117c | SPC24   | 1.279892 | 2.059561 | 0.904985414 | 1.852723 | 2.07221825 |
| YKL005c | BYE1    | 1.279627 | 2.996416 | 1.130770165 | 1.905189 | 1.50586755 |
| YMR143w | RPS16a  | 1.279186 | 0.544168 | 1.08354054  | 0.886624 | 0.9066438  |
| YJL189w | RPL39   | 1.279083 | 1.089842 | 1.702356933 | 0.835999 | 0.65196093 |
| YOL040c | RPS15   | 1.275995 | 0.418351 | 1.397089137 | 0.751385 | 0.77476015 |
| YKL189w | HYM1    | 1.275788 | 2.067156 | 1.645907578 | 1.218049 | 1.11814705 |
| YOR019w | YOR019w | 1.274989 | 2.60962  | 0.899418461 | 0.672023 | 0.67377944 |
| YDR204w | COQ4    | 1.274294 | 0.547886 | 0.880377731 | 1.327158 | 1.36171885 |
| YMR121c | RPL15b  | 1.273655 | 0.542313 | 0.719824319 | 0.816777 | 1.13627917 |
| YBR285w | YBR285w | 1.27292  | 4.962084 | 1.357107692 | 1.834487 | 2.22342646 |
| YJR077c | MIR1    | 1.271306 | 2.376787 | 1.037757612 | 1.450413 | 1.29157934 |
| YNL112w | DBP2    | 1.270168 | 0.783836 | 1.997288866 | 1.857068 | 2.23999976 |
| YOL164w | BDS1    | 1.268721 | 0.582651 | 0.418186063 | 0.674207 | 0.7121476  |
| YDR044w | HEM13   | 1.268196 | 0.497557 | 1.151660674 | 0.811258 | 0.81717991 |
| YGL189c | RPS26a  | 1.266822 | 0.511143 | 1.164154602 | 0.659614 | 0.66224226 |
| YEL024w | RIP1    | 1.265412 | 2.307072 | 1.445014332 | 1.281419 | 1.16602837 |
| YFR016c | YFR016c | 1.264539 | 1.958918 | 1.143879227 | 1.299087 | 1.23408276 |
| YDR508c | GNP1    | 1.264137 | 2.359065 | 1.096762637 | 1.440429 | 1.56788038 |
| YOR289w | YOR289w | 1.262429 | 1.0552   | 1.316689385 | 0.618637 | 0.54552445 |
| YKL138c | MRPL31  | 1.261804 | 1.059675 | 0.990880646 | 0.630584 | 0.58026407 |
| YBR048w | RPS11b  | 1.259943 | 0.422207 | 1.278487416 | 0.833848 | 0.98046244 |
| YGL084c | GUP1    | 1.258799 | 0.591505 | 1.314943257 | 0.944628 | 1.0718003  |
| YKL153w | YKL153w | 1.258125 | 1.025648 | 1.17737889  | 0.596639 | 0.61559027 |
| YPR156c | TPO3    | 1.257583 | 0.596155 | 1.136290277 | 1.39215  | 1.6743008  |
| YPR086w | SUA7    | 1.257265 | 1.259356 | 0.55461051  | 1.652394 | 2.25669634 |
| YDR481c | PHO8    | 1.256615 | 1.289073 | 1.610447946 | 1.633502 | 2.20213367 |
| YLR029c | RPL15a  | 1.256473 | 0.567379 | 0.753358946 | 0.849807 | 1.12966427 |
| YBL112c | YBL112c | 1.25475  | 2.044868 | 0.91671952  | 0.854958 | 1.03902595 |
| YGR260w | TNA1    | 1.253071 | 1.999681 | 1.587814284 | 2.106994 | 2.38923149 |
| YNR050c | LYS9    | 1.252569 | 0.563946 | 0.961185656 | 2.991039 | 3.59803235 |
| Unknown | Unknown | 1.24842  | 2.971804 | 1.395933867 | 1.087585 | 1.11726    |
| YJL159w | HSP150  | 1.246365 | 2.33441  | 1.465609538 | 1.747845 | 1.49729056 |

|         |         |          |          |             |          |            |
|---------|---------|----------|----------|-------------|----------|------------|
| YHR203c | RPS4b   | 1.244226 | 0.449556 | 1.383846035 | 0.992525 | 1.02296724 |
| YEL060c | PRB1    | 1.241643 | 2.447801 | 0.946512918 | 1.115602 | 1.20130487 |
| YBL007c | SLA1    | 1.241152 | 1.499446 | 1.390286365 | 2.984112 | 1.8168048  |
| YDR500c | RPL37b  | 1.238195 | 0.641269 | 1.174823792 | 0.769314 | 0.73506033 |
| YJR118c | ILM1    | 1.237264 | 0.864115 | 1.128018975 | 0.489408 | 0.44694056 |
| YDL110c | TMA17   | 1.236779 | 1.891746 | 1.282186039 | 0.772279 | 0.70049247 |
| YIL172c | YIL172c | 1.233547 | 2.118865 | 1.335677493 | 1.400214 | 1.16318729 |
| YHR128w | FUR1    | 1.233446 | 0.341032 | 1.495418348 | 0.707031 | 0.84092008 |
| YDR516c | EMI2    | 1.232863 | 2.012264 | 1.497348922 | 1.225344 | 0.95000522 |
| YIL155c | GUT2    | 1.230917 | 3.970387 | 1.387072088 | 1.589906 | 1.62944867 |
| YOR293w | RPS10a  | 1.230549 | 0.610268 | 0.978715125 | 0.878582 | 0.78508554 |
| YDL224c | WHI4    | 1.230223 | 2.315425 | 1.186913675 | 0.975309 | 0.97923813 |
| YGR202c | PCT1    | 1.229856 | 1.918108 | 1.264607837 | 1.249079 | 1.3186841  |
| YHL001w | RPL14b  | 1.228935 | 0.522428 | 1.478189082 | 0.868925 | 0.9148261  |
| YJL221c | FSP2    | 1.22831  | 2.058675 | 1.329233568 | 2.303915 | 1.19207497 |
| YBR076w | ECM8    | 1.227892 | 1.941934 | 1.009112261 | 1.191834 | 1.03071647 |
| YJR123w | RPS5    | 1.227884 | 0.472496 | 1.454674636 | 0.936264 | 1.01061516 |
| YMR015c | ERG5    | 1.226928 | 0.736225 | 1.504908033 | 2.37699  | 1.64748528 |
| YML042w | CAT2    | 1.221531 | 4.54641  | 1.288500292 | 2.403605 | 3.4005058  |
| YDR032c | PST2    | 1.221402 | 1.263163 | 1.811539392 | 0.896992 | 0.6703026  |
| YHR042w | NCP1    | 1.21919  | 1.073824 | 1.67004244  | 2.574436 | 2.50566111 |
| YMR116c | ASC1    | 1.217677 | 0.35404  | 1.398347729 | 0.934333 | 1.07598743 |
| YMR074c | YMR074c | 1.217109 | 0.625571 | 1.065825969 | 0.585187 | 0.54298476 |
| Unknown | Unknown | 1.215919 | 2.120594 | 1.088162885 | 0.962108 | 0.96046504 |
| YBL030c | PET9    | 1.21337  | 2.498535 | 1.251440274 | 1.498241 | 1.63468994 |
| YOL131w | YOL131w | 1.213316 | 1.047996 | 1.070046742 | 0.740203 | 0.59243447 |
| YJR102c | VPS25   | 1.213095 | 0.988672 | 1.170129924 | 0.649228 | 0.61119284 |
| YNL092w | YNL092w | 1.2126   | 2.304051 | 1.395873764 | 0.903384 | 1.01307801 |
| YLR079w | SIC1    | 1.21217  | 2.290714 | 1.351499006 | 1.0168   | 1.12564747 |
| YJR019c | TES1    | 1.207349 | 2.82583  | 1.314024358 | 1.420001 | 1.62655045 |
| YLR177w | YLR177w | 1.204496 | 1.123616 | 1.132966736 | 0.559539 | 0.55822459 |
| YJR026w | YJR026w | 1.203977 | 0.498136 | 0.412893147 | 0.850929 | #N/A       |
| YPL265w | DIP5    | 1.2037   | 2.964807 | 1.217727159 | 1.001478 | 1.10150008 |
| YPL201c | YIG1    | 1.203556 | 3.05132  | 1.473315729 | 2.224925 | 2.25232508 |
| YOR013w | YOR013w | 1.201211 | 1.452807 | 1.244667656 | 0.636422 | 0.70069716 |
| YJL037w | IRC18   | 1.200864 | 0.96788  | 0.814309976 | 0.555335 | 0.56144738 |
| YHR214w | YHR214w | 1.200564 | 2.135408 | 0.936478613 | 1.38286  | 1.20714372 |

|           |         |          |          |             |          |            |
|-----------|---------|----------|----------|-------------|----------|------------|
| YMR316w   | DIA1    | 1.199763 | 0.633543 | 1.33420957  | 0.42385  | 0.50827969 |
| YIL062c   | ARC15   | 1.199255 | 0.776977 | 1.051672428 | 0.529475 | 0.43048832 |
| YGR045c   | YGR045c | 1.198191 | 1.243648 | 1.051895705 | 0.737635 | 0.59922528 |
| YOL144w   | NOP8    | 1.197777 | 0.709624 | 0.875320185 | 0.543082 | 0.59168455 |
| YKL006C-A | Unknown | 1.197364 | 0.486237 | 1.327062088 | 0.849333 | 0.81260891 |
| YNR009w   | NRM1    | 1.196389 | 1.872958 | 1.161544136 | 1.295744 | 1.26947024 |
| YOR100c   | CRC1    | 1.196056 | 2.567186 | 0.990806367 | 1.70483  | 1.7345875  |
| YIR042c   | YIR042c | 1.195613 | 1.259072 | 1.188029458 | 0.581562 | 0.51316206 |
| YIL111w   | COX5b   | 1.194875 | 0.925654 | 1.224645763 | 0.465302 | 0.429237   |
| YDL166c   | FAP7    | 1.194442 | 0.588273 | 0.60334358  | 0.958077 | 0.93386211 |
| YDR418w   | RPL12b  | 1.194361 | 0.457059 | 1.411280597 | 0.805278 | 0.80892968 |
| YMR322c   | SNO4    | 1.192145 | 1.808708 | 1.180563791 | 0.64397  | 0.50830011 |
| YDL197c   | ASF2    | 1.191966 | 2.540856 | 1.049628889 | 1.423326 | 1.56755432 |
| YGR285c   | ZUO1    | 1.191529 | 0.858385 | 2.042595346 | 1.513148 | 1.22542371 |
| YBL099w   | ATP1    | 1.189565 | 2.822693 | 1.541748573 | 2.539816 | 2.19863338 |
| YMR178w   | YMR178w | 1.18935  | 0.602504 | 1.210302243 | 0.581005 | 0.62448373 |
| YGR027c   | RPS25a  | 1.186128 | 0.379034 | 1.482374628 | 0.659505 | 0.67344735 |
| YGR085c   | RPL11b  | 1.186029 | 0.470476 | 1.246898113 | 0.749416 | 0.85402277 |
| YER115c   | SPR6    | 1.18533  | 1.727064 | 1.158482042 | 1.032503 | 1.19421244 |
| YGR006w   | PRP18   | 1.184605 | 1.956596 | 1.245185819 | 1.144548 | 1.71120795 |
| YMR031c   | YMR031c | 1.182109 | 3.000307 | 1.895985282 | 2.081446 | 1.74230698 |
| YIL042c   | PKP1    | 1.181611 | 1.97715  | 1.392141397 | 1.458679 | 1.45158199 |
| YIL109c   | SEC24   | 1.181533 | 2.616176 | 1.346280677 | 1.48764  | 1.60852663 |
| YMR324c   | YMR324c | 1.181196 | 1.180876 | 1.257364438 | 0.703586 | 0.61667064 |
| YKL187c   | YKL187c | 1.180242 | 3.03375  | 1.237684193 | 1.025584 | 1.17834088 |
| YMR151w   | YIM2    | 1.180184 | 2.168774 | 1.370822368 | 1.162413 | 0.90932693 |
| YOL123w   | HRP1    | 1.180115 | 1.591935 | 1.14394777  | 0.81082  | 0.75091062 |
| YGR040w   | KSS1    | 1.179271 | 0.762285 | 0.398477628 | 1.507271 | 2.10648122 |
| YMR110c   | HFD1    | 1.177138 | 2.242683 | 1.598890243 | 1.593663 | 1.42808787 |
| YKR050w   | TRK2    | 1.176965 | 2.183543 | 1.117119058 | 1.771103 | 1.83708796 |
| YKL152c   | GPM1    | 1.175612 | 0.484372 | 1.500239105 | 0.630613 | 0.51073342 |
| YLL020c   | YLL020c | 1.174714 | 2.515623 | 0.621888541 | 0.989774 | 1.28717472 |
| YMR030w   | RSF1    | 1.17454  | 2.279387 | 1.028184125 | 1.436687 | 1.34472121 |
| YIL157c   | COA1    | 1.173102 | 1.249088 | 1.257393615 | 0.63128  | 0.77234646 |
| YHR057c   | CPR2    | 1.172405 | 1.874697 | 1.331667039 | 0.829082 | 0.81672423 |
| YNL138w   | SRV2    | 1.170647 | 1.133633 | 1.54459973  | 1.984076 | 2.07983731 |
| YGR185c   | TYS1    | 1.170174 | 0.638953 | 1.059919332 | 1.637055 | 1.48346441 |



|         |         |          |          |             |          |            |
|---------|---------|----------|----------|-------------|----------|------------|
| YOL132w | GAS4    | 1.169513 | 0.950173 | 1.047107821 | 0.510904 | 0.43833668 |
| YAL062w | GDH3    | 1.16943  | 2.219909 | 1.334284305 | 1.574365 | 1.93756831 |
| YOL037c | YOL037c | 1.167768 | 1.113114 | 0.93363713  | 0.616186 | 0.68028073 |
| YJR145c | RPS4a   | 1.167693 | 0.368988 | 1.257562676 | 0.931918 | 0.8846205  |
| YEL054c | RPL12a  | 1.167329 | 0.486607 | 1.259665787 | 0.852874 | 0.82524726 |
| YER056c | FCY2    | 1.166837 | 0.630679 | 1.282382603 | 0.748145 | 0.81860685 |
| YKL217w | JEN1    | 1.16546  | 3.014121 | 1.457835402 | 2.005904 | 2.51344083 |
| YEL051w | VMA8    | 1.165067 | 0.465877 | 1.685648955 | 1.343398 | 0.95815724 |
| YDR436w | PPZ2    | 1.163863 | 1.908833 | 1.078460952 | 1.241858 | 1.3621016  |
| YOL071w | EMI5    | 1.163523 | 1.205591 | 1.342442625 | 0.702388 | 0.56138204 |
| YIL033c | BCY1    | 1.163233 | 2.356221 | 1.216377861 | 1.121679 | 1.31668865 |
| YIL069c | RPS24b  | 1.163229 | 0.539141 | 1.362161424 | 0.840408 | 0.78944229 |
| YER102w | RPS8b   | 1.162376 | 0.408767 | 1.457294562 | 0.899642 | 0.8667016  |
| YIR016w | YIR016w | 1.160931 | 2.055667 | 0.94270761  | 0.843251 | 0.79935499 |
| YLL041c | SDH2    | 1.160928 | 3.358978 | 1.16870204  | 1.494247 | 1.4806959  |
| YDR304c | CPR5    | 1.160631 | 1.926222 | 0.785699558 | 1.531347 | 2.01083474 |
| YFR044c | DUG1    | 1.159653 | 1.591289 | 1.799872798 | 1.683049 | 1.66565426 |
| YMR096w | SNZ1    | 1.158052 | 0.232161 | 0.037812143 | 1.750332 | 2.19388473 |
| YKR067w | GPT2    | 1.157009 | 3.280196 | 1.125026048 | 1.973962 | 2.0400886  |
| YLR219w | MSC3    | 1.156973 | 2.42609  | 0.796939242 | 1.261046 | 1.2109872  |
| YLR304c | ACO1    | 1.15623  | 2.216845 | 1.860323124 | 1.682485 | 1.3779473  |
| YHR039c | MSC7    | 1.155686 | 0.91359  | 1.796483202 | 2.727827 | 2.51182051 |
| YMR264w | CUE1    | 1.155439 | 0.702983 | 1.198423559 | 0.700048 | 0.63524817 |
| YOR011w | AUS1    | 1.154535 | 1.106999 | 1.105918073 | 0.791204 | 0.61593829 |
| YFR017c | YFR017c | 1.151737 | 2.992281 | 1.247153408 | 0.994769 | 0.97120687 |
| YPL220w | RPL1a   | 1.149896 | 0.513751 | 1.317994495 | 0.957728 | 0.96459067 |
| YBL056w | PTC3    | 1.149316 | 1.430508 | 1.075323522 | 2.00058  | 2.54436305 |
| YOR391c | HSP33   | 1.147974 | 1.748297 | 1.330566015 | 0.558728 | 0.44121542 |
| YLR185w | RPL37a  | 1.147609 | 0.52994  | 1.062304671 | 0.731034 | 0.79569867 |
| YAL065c | YAL065c | 1.147197 | 2.381159 | 1.013560424 | 1.389611 | 1.40655051 |
| YJR021c | REC107  | 1.146608 | 1.843892 | 1.201095178 | 1.084243 | 1.07533328 |
| YOR317w | FAA1    | 1.146314 | 1.87709  | 1.210993784 | 2.013693 | 2.16451741 |
| YDR509w | YDR509w | 1.144635 | 1.906934 | 1.082312154 | 1.139926 | 1.18360949 |
| YNL335w | DDI3    | 1.144468 | 2.072636 | 1.219225273 | 1.364622 | 1.27805464 |
| YNR007c | ATG3    | 1.14407  | 2.083267 | 0.968358275 | 1.303802 | 1.22252164 |
| YBR298c | MAL31   | 1.140263 | 1.802961 | 0.760493002 | 1.179077 | 0.94982771 |
| YPL081w | RPS9a   | 1.137335 | 0.555062 | 0.743015471 | 1.031953 | 1.23353415 |

|         |         |          |          |             |          |            |
|---------|---------|----------|----------|-------------|----------|------------|
| YIL106w | MOB1    | 1.136935 | 1.77167  | 0.933310342 | 1.261622 | 1.41934024 |
| YER156c | YER156c | 1.13668  | 1.017171 | 2.04947506  | 1.389606 | 1.28220794 |
| YDR001c | NTH1    | 1.136028 | 2.357565 | 1.126341868 | 2.17491  | 2.27779259 |
| YHL041w | YHL041w | 1.135058 | 0.782418 | 1.060931178 | 0.641403 | 0.59257169 |
| YLR194c | YLR194c | 1.134568 | 1.17737  | 1.021234453 | 0.599208 | 0.66755647 |
| YBR181c | RPS6b   | 1.133253 | 0.351365 | 1.343037539 | 0.92455  | 1.09959084 |
| YER187w | YER187w | 1.131866 | 1.870488 | 1.272960273 | 0.861371 | 0.84146369 |
| YHR100c | YHR100c | 1.131691 | 1.116509 | 1.149147939 | 0.387492 | 0.41945348 |
| YEL070w | DSF1    | 1.13008  | 2.634681 | 1.135027641 | 1.366079 | 1.22751622 |
| YNL333w | SNZ2    | 1.127899 | 1.041769 | 1.185964588 | 0.388563 | 0.45729812 |
| YML100w | TSL1    | 1.126838 | 1.942634 | 1.446520524 | 1.446969 | 1.60113737 |
| YIL113w | SDP1    | 1.126691 | 1.153344 | 0.862398718 | 0.480859 | 0.35719156 |
| Unknown | Unknown | 1.125556 | 1.302572 | 0.942020529 | 0.566055 | 0.65857833 |
| YGR209c | TRX2    | 1.125113 | 0.646381 | 1.336856343 | 0.533535 | 0.49491742 |
| YLL023c | YLL023c | 1.124768 | 2.076703 | 1.112806278 | 0.846395 | 0.86419963 |
| YPR069c | SPE3    | 1.123852 | 0.52061  | 1.748109942 | 1.214265 | 1.08374849 |
| YOR335c | ALA1    | 1.120528 | 0.900294 | 0.879034406 | 3.202743 | 3.14573744 |
| YER065c | ICL1    | 1.120044 | 3.438527 | 1.612862106 | 1.662148 | 2.19220269 |
| YOR052c | YOR052c | 1.119889 | 1.216394 | 1.030052335 | 0.600067 | 0.52523118 |
| YBR139w | YBR139w | 1.119136 | 2.210013 | 1.446108295 | 1.070473 | 0.92658239 |
| YOR254c | SEC63   | 1.118957 | 0.884964 | 1.59168837  | 2.211196 | 2.18500636 |
| YPL230w | USV1    | 1.118646 | 2.310725 | 1.195462675 | 1.338781 | 1.17648744 |
| YGL138c | YGL138c | 1.117501 | 0.828536 | 0.981577047 | 0.65765  | 0.55698986 |
| YMR152w | YIM1    | 1.117235 | 1.880054 | 1.467796144 | 1.593173 | 1.42832447 |
| YNL135c | FPR1    | 1.116759 | 0.77165  | 1.203780911 | 0.506415 | 0.40525865 |
| YCRX02C | Unknown | 1.116735 | 2.078103 | 1.108209108 | 1.309074 | 1.20396611 |
| YIL105c | SLM1    | 1.116724 | 2.801656 | 1.250937949 | 2.021716 | 2.12595239 |
| YDL208w | NHP2    | 1.116681 | 0.60829  | 1.046506158 | 0.573146 | 0.70308026 |
| YDR454c | GUK1    | 1.116256 | 0.484743 | 1.318960832 | 0.704882 | 0.59607298 |
| YGL222c | EDC1    | 1.115934 | 2.240412 | 1.065161896 | 1.18674  | 1.20861335 |
| YMR242c | RPL20a  | 1.115423 | 0.346547 | 1.251843561 | 0.872403 | 0.75943355 |
| YBR154c | RPB5    | 1.114876 | 0.434107 | 0.913151881 | 0.796335 | 0.78352659 |
| YNL173c | MDG1    | 1.112309 | 3.408201 | 1.32126351  | 1.105988 | 1.11698244 |
| YDR533c | HSP31   | 1.11216  | 1.171165 | 1.098736496 | 0.297248 | 0.30777321 |
| YLL050c | COF1    | 1.111128 | 0.622185 | 1.478650038 | 0.698578 | 0.64102604 |
| YDR281c | PHM6    | 1.109484 | 2.01921  | 1.212653759 | 1.16375  | 1.06923917 |
| YLR325c | RPL38   | 1.109125 | 0.478468 | 1.284493546 | 0.614408 | 0.67083383 |

|           |         |          |          |             |          |            |
|-----------|---------|----------|----------|-------------|----------|------------|
| YBL005w   | PDR3    | 1.108712 | 2.016582 | 0.817216621 | 2.240661 | 1.37548989 |
| YDL046w   | NPC2    | 1.108078 | 2.255745 | 0.907746555 | 1.293935 | 1.37450193 |
| YNL168c   | FMP41   | 1.107876 | 0.752923 | 1.421098816 | 0.557158 | 0.50163698 |
| YDR273w   | DON1    | 1.104481 | 1.785621 | 1.119613523 | 0.780104 | 0.90576036 |
| YLL019c   | KNS1    | 1.10362  | 2.423816 | 0.700783188 | 1.701124 | 1.95520726 |
| YKL159c   | RCN1    | 1.102718 | 0.819544 | 1.131610889 | 0.614368 | 0.62543031 |
| YBR114w   | RAD16   | 1.102156 | 0.539115 | 0.79971183  | 0.973601 | 0.83022231 |
| YEL039c   | CYC7    | 1.101642 | 2.712367 | 1.454572357 | 1.756149 | 1.42291922 |
| YEL010w   | YEL010w | 1.101508 | 0.658333 | 1.088371278 | 1.09789  | 1.21611993 |
| YBL041w   | PRE7    | 1.098836 | 0.974655 | 0.967196455 | 0.681852 | 0.55920543 |
| YFR020w   | YFR020w | 1.098285 | 2.014995 | 1.01772777  | 1.32971  | 1.48957777 |
| YOR276w   | CAF20   | 1.097238 | 0.46478  | 1.135895247 | 0.683744 | 0.77753046 |
| YDR168w   | CDC37   | 1.097164 | 1.847746 | 0.985502399 | 1.681345 | 1.75693464 |
| YER030w   | CHZ1    | 1.095039 | 0.804906 | 1.031142838 | 0.632725 | 0.56610214 |
| YDR519w   | FPR2    | 1.094864 | 0.59953  | 1.072870734 | 0.542286 | 0.56581856 |
| YBR191w   | RPL21a  | 1.094827 | 0.449184 | 1.262438945 | 0.86326  | 0.98553498 |
| YDL174c   | DLD1    | 1.093569 | 2.6505   | 1.259643077 | 1.74553  | 1.51569524 |
| YPL090c   | RPS6a   | 1.092662 | 0.384386 | 1.279719268 | 1.060234 | 1.11922503 |
| YIR019c   | MUC1    | 1.091897 | 1.956126 | 0.976970383 | 1.091237 | 1.15658113 |
| YFL059w   | SNZ3    | 1.091891 | 1.35178  | 1.22900588  | 0.548554 | 0.54005735 |
| YIL171w   | YIL171w | 1.090211 | 2.346942 | 1.375742634 | 1.095719 | 1.14365922 |
| YDR024w   | FYV1    | 1.090001 | 0.549162 | 0.881964384 | 0.643545 | 0.667158   |
| YDR429c   | TIF35   | 1.087345 | 0.603881 | 1.135724296 | 0.586456 | 0.80310033 |
| YDL009c   | YDL009c | 1.087275 | 0.862681 | 1.302510106 | 0.689302 | 0.57022243 |
| YML120c   | NDI1    | 1.086289 | 2.192031 | 1.246462138 | 1.150727 | 1.09209467 |
| YCR034w   | FEN1    | 1.080095 | 0.570283 | 1.112387206 | 0.979741 | 0.88112197 |
| YCR071c   | IMG2    | 1.079492 | 1.013285 | 1.109018436 | 0.600353 | 0.63035765 |
| YNL017c   | YNL017c | 1.078099 | 1.17095  | 0.940385505 | 0.763702 | 0.62379417 |
| YLR205c   | HMX1    | 1.077328 | 1.335378 | 0.892200336 | 0.582446 | 0.52232586 |
| YPR102c   | RPL11a  | 1.077134 | 0.413521 | 1.184513608 | 0.702985 | 0.75479135 |
| YKL201C   | YKL200C | 1.075411 | 0.697503 | 0.375466067 | 1.040926 | 0.86917811 |
| YHR087w   | RTC3    | 1.074757 | 2.079633 | 1.497719559 | 0.816035 | 0.57902848 |
| YNL142w   | MEP2    | 1.07447  | 1.213396 | 1.172776639 | 1.856292 | 2.51840622 |
| YGR148c   | RPL24b  | 1.073363 | 0.459032 | 1.012028007 | 0.68654  | 0.81282306 |
| YLR164w   | YLR164w | 1.071753 | 2.163763 | 1.116427072 | 0.869192 | 0.79944579 |
| YDL049c   | KNH1    | 1.070341 | 1.115656 | 1.025601201 | 2.421955 | 2.17300553 |
| YBR084C-A | Unknown | 1.070216 | 0.467957 | 1.342752236 | 0.885127 | 0.99276547 |

|         |         |          |          |             |          |            |
|---------|---------|----------|----------|-------------|----------|------------|
| YCR081W | YCR080W | 1.069767 | 1.001956 | 1.179537253 | 0.512587 | 0.55196653 |
| YER071c | YER071c | 1.069271 | 0.717947 | 0.857500323 | 0.649199 | 0.56474695 |
| YLR218c | YLR218c | 1.068747 | 1.024495 | 0.98534249  | 0.534243 | 0.42304794 |
| YML028w | TSA1    | 1.068574 | 0.889774 | 1.304545453 | 0.553024 | 0.506407   |
| YGL047w | ALG13   | 1.068178 | 0.97008  | 1.106255468 | 0.538394 | 0.46640481 |
| YJL020C | YJL021C | 1.067276 | 1.908259 | 0.858523621 | 0.972659 | 0.95408274 |
| YKR059w | TIF1    | 1.06715  | 0.566835 | 1.165599052 | 1.486612 | 1.73100489 |
| YLR048w | RPS0b   | 1.066982 | 0.564897 | 1.155543397 | 1.056771 | 1.0213256  |
| YBR106w | PHO88   | 1.066738 | 0.412891 | 0.857045248 | 1.063305 | 0.73004466 |
| YDR139c | RUB1    | 1.066458 | 0.540426 | 1.032081009 | 0.499568 | 0.486607   |
| YER046w | SPO73   | 1.064769 | 1.367199 | 0.85729649  | 0.656264 | 0.50528391 |
| YMR233w | TRI1    | 1.063197 | 0.581956 | 0.900952954 | 0.514449 | 0.57293384 |
| YGR289c | MAL11   | 1.060856 | 1.861759 | 1.104349473 | 0.931882 | 0.92539883 |
| YML073c | RPL6a   | 1.06039  | 0.502769 | 1.226099901 | 0.850285 | 0.85028632 |
| YPL044c | YPL044c | 1.060116 | 0.648546 | 1.087938266 | 0.957322 | 1.06359635 |
| YHR092c | HXT4    | 1.057343 | 1.805413 | 1.637917903 | 1.73682  | 1.46291918 |
| YDL082w | RPL13a  | 1.055821 | 0.409413 | 1.10326579  | 0.868936 | 0.98490187 |
| YLR081w | GAL2    | 1.054833 | 2.133149 | 1.524730902 | 1.102464 | 1.17306479 |
| YGL031c | RPL24a  | 1.054422 | 0.428442 | 1.04310904  | 0.804511 | 0.9248559  |
| YNL018c | YNL018c | 1.052571 | 0.809186 | 1.008473718 | 0.495478 | 0.52178312 |
| YDR324c | UTP4    | 1.052464 | 2.068242 | 1.082216249 | 1.446599 | 1.42776724 |
| YDL130w | RPP1b   | 1.052426 | 0.47412  | 1.385867475 | 0.660332 | 0.68505285 |
| YKL148c | SDH1    | 1.051866 | 2.838771 | 1.923464722 | 1.892981 | 1.53846178 |
| YPL163c | SVS1    | 1.051766 | 2.003631 | 1.586885543 | 1.518774 | 1.69685314 |
| YER111c | SWI4    | 1.050914 | 1.720364 | 1.047070663 | 1.272191 | 1.10096989 |
| YPL211w | NIP7    | 1.050552 | 0.587152 | 1.613403734 | 0.938067 | 0.92461287 |
| YLR174w | IDP2    | 1.050293 | 2.410625 | 0.883843854 | 1.472491 | 1.7222112  |
| YBL045c | COR1    | 1.050197 | 2.223867 | 1.492599143 | 1.943323 | 1.55937535 |
| YJL214w | HXT8    | 1.046366 | 1.929544 | 1.525968234 | 0.636113 | 0.70337895 |
| YOR134w | BAG7    | 1.046135 | 2.670696 | 1.371560078 | 1.727112 | 1.81761084 |
| YOR312c | RPL20b  | 1.045683 | 0.450027 | 1.174376703 | 0.886896 | 0.90112507 |
| YCL034w | LSB5    | 1.044434 | 1.748095 | 1.030765446 | 0.980528 | 0.99618827 |
| YBR179c | FZO1    | 1.044314 | 0.465868 | 1.152834392 | 0.893337 | 1.06225887 |
| YLL045c | RPL8b   | 1.043942 | 0.528247 | 1.217923666 | 0.889251 | 0.84228659 |
| YOR375c | GDH1    | 1.04373  | 1.828613 | 1.298028518 | 2.175223 | 2.13803345 |
| YMR326c | YMR326c | 1.043216 | 0.917998 | 0.883445853 | 0.716948 | 0.60788409 |
| YPR194c | OPT2    | 1.041246 | 1.789454 | 1.297839296 | 1.096577 | 1.33676353 |

|         |         |          |          |             |          |            |
|---------|---------|----------|----------|-------------|----------|------------|
| YPR063c | YPR063c | 1.040447 | 0.863825 | 1.042753427 | 0.711545 | 0.61742336 |
| YJL096w | MRPL49  | 1.040387 | 0.947177 | 0.909510967 | 0.703858 | 0.59618253 |
| YKL137w | CMC1    | 1.038584 | 0.898567 | 0.931693104 | 0.576402 | 0.51576341 |
| YLL053c | YLL053c | 1.038322 | 1.576616 | 1.049259057 | 0.462531 | 0.37712288 |
| YPL136w | YPL136w | 1.037523 | 1.281895 | 1.052530994 | 0.571696 | 0.68908445 |
| YGR180c | RNR4    | 1.036732 | 0.604847 | 0.897064846 | 1.298965 | 1.47783751 |
| YDL083c | RPS16b  | 1.032553 | 0.564968 | 1.122314052 | 0.950251 | 0.97464221 |
| YBL059w | YBL059w | 1.031686 | 1.046173 | 1.049074558 | 0.582986 | 0.56828945 |
| YIL099w | SGA1    | 1.030943 | 2.653801 | 0.854032701 | 1.151807 | 1.22518586 |
| YLR162w | YLR162w | 1.030421 | 0.860884 | 0.255954467 | 0.851125 | 1.52939003 |
| YIL016w | SNL1    | 1.028582 | 0.610556 | 0.92228207  | 0.560526 | 0.51188342 |
| YFR015c | GSY1    | 1.028377 | 3.179076 | 1.670492134 | 1.961791 | 1.4794541  |
| YHR037w | PUT2    | 1.026874 | 1.448513 | 0.882378668 | 2.106926 | 2.04745223 |
| YLR150w | STM1    | 1.023776 | 0.457737 | 1.353468131 | 0.762248 | 0.67940028 |
| YGL130w | CEG1    | 1.021631 | 1.552087 | 1.094576771 | 2.40319  | 1.30261266 |
| Unknown | Unknown | 1.021258 | 1.741287 | 0.931426105 | 0.905501 | 0.92879239 |
| YLL026w | HSP104  | 1.018144 | 2.055348 | 1.354000774 | 1.84902  | 1.6790481  |
| YBR022w | POA1    | 1.018006 | 0.61063  | 0.929668867 | 0.654806 | 0.67614808 |
| YOR049c | RSB1    | 1.017872 | 1.885738 | 1.299552756 | 1.194977 | 1.21232107 |
| YKR066c | CCP1    | 1.016663 | 1.90896  | 1.049744895 | 1.409208 | 1.42696107 |
| YER131w | RPS26b  | 1.016394 | 0.475106 | 1.02546605  | 0.576109 | 0.64774071 |
| YPR094w | RDS3    | 1.015733 | 0.758436 | 0.953505139 | 0.613524 | 0.52775262 |
| YJR034w | PET191  | 1.013001 | 1.097302 | 1.204722672 | 0.627664 | 0.51778016 |
| YMR011w | HXT2    | 1.012888 | 2.422512 | 0.450380237 | 2.836725 | 0          |
| YMR011w | HXT2    | 1.012888 | 2.422512 | 0.450380237 | 2.836725 | #N/A       |
| YIL059c | YIL059c | 1.012527 | 2.583324 | 1.113303905 | 1.112657 | 1.64677115 |
| YDR150w | NUM1    | 1.011659 | 1.90201  | 0.978826041 | 1.167615 | 1.3789957  |
| YDR002w | YRB1    | 1.010345 | 0.489142 | 1.164534653 | 0.91569  | 1.0050654  |
| YBR286w | APE3    | 1.010005 | 1.766067 | 1.367292401 | 1.799248 | 1.77798723 |
| YNL310c | ZIM17   | 1.007512 | 0.845326 | 1.139783101 | 0.62491  | 0.58117362 |
| YFR032c | YFR032c | 1.00722  | 1.157186 | 1.066296348 | 0.596702 | 0.64896642 |
| YJR029w | YJR029w | 1.002762 | 0.674844 | 0.621623074 | 0.84287  | 1.03094642 |
| YNL155w | YNL155w | 1.001805 | 0.869195 | 0.911779572 | 0.850488 | 0.61129892 |
| YER043c | SAH1    | 1.000718 | 0.926612 | 1.83346005  | 2.348669 | 2.08895069 |
| YBR021w | FUR4    | 1.000391 | 0.582451 | 0.91207469  | 0.733693 | 0.76033736 |
| YKL056c | TMA19   | 1.000033 | 0.428396 | 1.039057515 | 1.079556 | 1.09140642 |
| YLR311c | YLR311c | 0.997497 | 2.737728 | 0.918117635 | 1.078245 | 1.0726402  |

|           |           |          |          |             |          |            |
|-----------|-----------|----------|----------|-------------|----------|------------|
| YEL001c   | IRC22     | 0.995485 | 0.515536 | 1.169374918 | 0.808111 | 0.69096746 |
| YER079w   | YER079w   | 0.994659 | 1.307174 | 0.835528062 | 0.592197 | 0.54598589 |
| YLL049w   | LDB18     | 0.994426 | 0.779332 | 0.858902217 | 0.668462 | 0.58769157 |
| YEL076c   | YEL076c   | 0.99428  | 0.876492 | 0.895228984 | 0.602991 | 0.73484791 |
| YMR244C-A | Unknown   | 0.993434 | 0.945117 | 0.719160105 | 0.567045 | 0.49871426 |
| YJR099w   | YUH1      | 0.992808 | 0.782565 | 1.042719062 | 0.629148 | 0.62615389 |
| YBR282w   | MRPL27    | 0.992558 | 0.939761 | 0.963355533 | 0.755642 | 0.62246963 |
| YNR014w   | YNR014w   | 0.991905 | 2.456931 | 0.898174205 | 1.481191 | 1.36133385 |
| YJL034w   | KAR2      | 0.990491 | 1.084361 | 1.875829699 | 1.505209 | 1.59191418 |
| YNR064c   | YNR064c   | 0.990431 | 1.731144 | 0.863677621 | 1.040495 | 0.96304557 |
| YDL079c   | MRK1      | 0.990316 | 1.871529 | 0.768210428 | 1.27769  | 1.09336181 |
| YCR039c   | MATALPHA2 | 0.989452 | 1.011669 | 1.143045226 | 0.529305 | 0.58922909 |
| YIL098c   | FMC1      | 0.989122 | 1.178844 | 0.931745426 | 0.659397 | 0.63382684 |
| YBL027w   | RPL19b    | 0.986375 | 0.487201 | 1.552180865 | 1.011633 | 1.11142684 |
| YCR096c   | HMRA2     | 0.986125 | 0.973534 | 1.130545778 | 0.508134 | 0.59355609 |
| YDR246w   | TRS23     | 0.985217 | 3.253718 | 1.403850869 | 1.885914 | 1.4050668  |
| YCL032w   | STE50     | 0.984889 | 2.095546 | 0.943983301 | 1.27114  | 1.5120782  |
| YPR189w   | SKI3      | 0.984569 | 1.265359 | 0.889544091 | 1.051971 | 0.91428004 |
| YLR154c   | RNH203    | 0.984194 | 0.910625 | 0.927935485 | 0.711099 | 0.52874888 |
| YGL230c   | YGL230c   | 0.983746 | 1.18367  | 0.832208928 | 0.585358 | 0.52296968 |
| YGR215w   | RSM27     | 0.983558 | 0.979526 | 1.012796234 | 0.608711 | 0.80488938 |
| YOR345c   | YOR345c   | 0.981085 | 1.369911 | 0.85997388  | 0.604182 | 0.53765992 |
| YLR013w   | GAT3      | 0.980346 | 0.721198 | 0.819106282 | 0.602548 | 0.55366746 |
| YOL061w   | PRS5      | 0.980214 | 1.134863 | 0.771943469 | 1.807759 | 2.06601322 |
| Unknown   | Unknown   | 0.978047 | 0.744427 | 1.004670065 | 0.493901 | 0.47172305 |
| YCL020w   | YCL020w   | 0.977763 | 0.654142 | 0.555452613 | 0.799619 | 0.90065568 |
| YKL180w   | RPL17a    | 0.972906 | 0.550411 | 1.483496304 | 1.00788  | 0.94424711 |
| YAL045c   | YAL045c   | 0.971017 | 1.175432 | 0.885294606 | 0.69177  | 0.88249453 |
| YKR009c   | FOX2      | 0.97002  | 3.499951 | 1.196647949 | 1.862555 | 2.1079818  |
| YML056c   | IMD4      | 0.969923 | 0.961836 | 1.495292133 | 2.326163 | 2.62661496 |
| YKL071w   | YKL071w   | 0.969814 | 1.876515 | 0.832562792 | 1.576105 | 1.79308321 |
| YJL219w   | HXT9      | 0.969742 | 1.991533 | 1.329308592 | 0.987478 | 1.14503199 |
| YDR267c   | CIA1      | 0.969261 | 1.1429   | 1.0043481   | 1.962581 | 2.22757618 |
| YOR032c   | HMS1      | 0.967857 | 1.678271 | 0.984576726 | 0.533215 | 0.65371402 |
| YOL143c   | RIB4      | 0.967388 | 0.634941 | 1.516627207 | 0.615157 | 0.45354974 |
| YHR200w   | RPN10     | 0.966489 | 1.304243 | 1.034788    | 0.668824 | 0.62092589 |
| YLR197w   | NOP56     | 0.966474 | 0.685046 | 1.611591929 | 2.303735 | 2.73175714 |

|           |         |          |          |             |          |            |
|-----------|---------|----------|----------|-------------|----------|------------|
| YLR344w   | RPL26a  | 0.966138 | 0.362424 | 1.044267101 | 0.805627 | 0.83343905 |
| YCL026C-B | Unknown | 0.965972 | 1.058843 | 0.838829128 | 0.910175 | 0.91517271 |
| YDR386w   | MUS81   | 0.964968 | 1.812236 | 0.993788221 | 1.574577 | 1.54756793 |
| YDR247w   | VHS1    | 0.964179 | 3.391204 | 1.459180094 | 1.877984 | 1.40161797 |
| YIL060w   | YIL060w | 0.962047 | 0.447648 | 0.522033141 | 0.536766 | 0.66827073 |
| YML063w   | RPS1b   | 0.961946 | 0.404933 | 1.409360183 | 1.127164 | 1.13006171 |
| YOL028c   | YAP7    | 0.961667 | 1.16519  | 1.108525558 | 1.996377 | 1.75358838 |
| YBR099c   | YBR099c | 0.961534 | 1.794399 | 0.751244853 | 0.813627 | 0.87093475 |
| YER015w   | FAA2    | 0.961059 | 3.03686  | 1.188852626 | 2.525057 | 3.50179212 |
| YDL120w   | YFH1    | 0.960268 | 0.848697 | 0.935844413 | 0.487937 | 0.54376603 |
| YHR193c   | EGD2    | 0.959135 | 0.543954 | 1.281259577 | 0.694679 | 0.79896064 |
| YJR149w   | YJR149w | 0.957303 | 2.530923 | 1.013246204 | 1.343744 | 1.40016133 |
| YLR408c   | YLR408c | 0.95692  | 0.875346 | 1.01203034  | 0.710686 | 0.57123413 |
| YDR225w   | HTA1    | 0.956471 | 0.477329 | 1.054265177 | 1.332018 | 1.71847792 |
| YBR261c   | TAE1    | 0.956311 | 0.539544 | 0.864200217 | 0.736835 | 0.84677013 |
| YDR514c   | YDR514c | 0.956289 | 0.458103 | 1.212975615 | 0.806568 | 0.83051998 |
| YKL178c   | STE3    | 0.954292 | 0.436956 | 1.357973752 | 0.410359 | 0.49811823 |
| YDL051w   | LHP1    | 0.954193 | 0.540938 | 1.067303051 | 0.984261 | 1.08207588 |
| YER163c   | YER163c | 0.953009 | 0.798973 | 1.070084502 | 0.544794 | 0.5114751  |
| YGR253c   | PUP2    | 0.952829 | 0.682628 | 1.285784407 | 0.650666 | 0.46524002 |
| YDR403w   | DIT1    | 0.95066  | 1.14394  | 0.928876011 | 0.568828 | 0.51065354 |
| YDR403W   | Unknown | 0.949512 | 0.644697 | 0.548536101 | 0.722486 | 0.92749078 |
| YLR044c   | PDC1    | 0.947258 | 0.563708 | 1.666774938 | 2.082144 | 1.29060438 |
| YNR037c   | RSM19   | 0.947233 | 0.786696 | 0.931259371 | 0.414911 | 0.4092862  |
| YLL042c   | ATG10   | 0.947051 | 1.19944  | 1.103140146 | 0.622919 | 0.52271227 |
| YBL051c   | PIN4    | 0.946799 | 1.47246  | 1.015945951 | 2.863493 | 1.73419156 |
| YMR061w   | RNA14   | 0.945451 | 0.818649 | 0.971584392 | 1.766268 | 1.72640611 |
| YOR044w   | IRC23   | 0.943642 | 0.596542 | 0.546007507 | 1.024208 | 0.79879249 |
| YGL255w   | ZRT1    | 0.943207 | 1.650198 | 0.611393875 | 6.205394 | 5.29039803 |
| YKR046c   | PET10   | 0.942434 | 1.872913 | 1.011181622 | 1.060331 | 1.0021954  |
| YGL226w   | MTC3    | 0.942002 | 1.2456   | 1.115399601 | 0.544866 | 0.69343255 |
| YDR522c   | SPS2    | 0.941573 | 0.958909 | 1.055354332 | 0.651006 | 0.49711344 |
| YNL210w   | MER1    | 0.941186 | 0.710871 | 0.848420256 | 0.638683 | 0.6528946  |
| YAL013w   | DEP1    | 0.9406   | 1.781586 | 0.638682936 | 1.196037 | 1.5988035  |
| YHR178w   | STB5    | 0.93797  | 0.555801 | 0.895717034 | 1.156835 | 0.94609724 |
| YPR200c   | ARR2    | 0.93779  | 1.526536 | 1.048036719 | 0.615948 | 0.76256101 |
| YLR249w   | YEF3    | 0.937646 | 1.038357 | 1.419013799 | 2.317192 | 2.016866   |

|         |         |          |          |             |          |            |
|---------|---------|----------|----------|-------------|----------|------------|
| YDR023w | SES1    | 0.937072 | 0.522733 | 1.063995372 | 1.340083 | 1.27724394 |
| YER028c | MIG3    | 0.93621  | 0.956008 | 0.691765833 | 0.610757 | 0.64887122 |
| YMR196w | YMR196w | 0.935027 | 0.778123 | 0.831173582 | 0.700622 | 0.58987926 |
| YNL079c | TPM1    | 0.933727 | 0.693247 | 0.748550348 | 0.650123 | 0.56188617 |
| YLR441c | RPS1a   | 0.932454 | 0.333049 | 1.292083883 | 1.086695 | 1.12342274 |
| YOR082c | YOR082c | 0.931148 | 1.740086 | 0.931409232 | 0.818328 | 0.70169404 |
| YDL236w | PHO13   | 0.930283 | 0.631006 | 0.99702019  | 0.937188 | 1.0613739  |
| YDR040c | ENA1    | 0.929419 | 2.115422 | 0.895334283 | 1.78791  | 1.81839798 |
| YDR040C | Unknown | 0.929154 | 0.683689 | 0.587990853 | 0.776957 | 0.91186682 |
| YLR215c | CDC123  | 0.929088 | 0.578329 | 1.008981713 | 0.96562  | 1.15531708 |
| YLR354c | TAL1    | 0.927465 | 0.46189  | 0.884508518 | 1.176866 | 1.06808447 |
| YJL151c | SNA3    | 0.927402 | 0.716158 | 0.801522319 | 0.428362 | 0.58085841 |
| YLR305c | STT4    | 0.925874 | 0.97747  | 0.970408063 | 0.563639 | 0.5221558  |
| YNL122c | YNL122c | 0.925857 | 0.774934 | 0.876045123 | 0.527921 | 0.53359869 |
| YDL008w | APC11   | 0.924772 | 0.661231 | 0.881317935 | 0.48544  | 0.47964966 |
| YPL111w | CAR1    | 0.922712 | 1.979144 | 0.802722933 | 2.622598 | 2.42911137 |
| YMR112c | MED11   | 0.92174  | 0.52421  | 0.711259249 | 0.622066 | 0.63156606 |
| YDL219w | DTD1    | 0.921448 | 0.411072 | 0.960573179 | 0.547769 | 0.43907772 |
| YIL065c | FIS1    | 0.920284 | 0.953925 | 0.904204845 | 0.570575 | 0.49042897 |
| YLR255c | YLR255c | 0.919629 | 1.134446 | 0.830943197 | 0.55602  | 0.5999227  |
| YHR145c | YHR145c | 0.918395 | 0.433518 | 0.477073717 | 0.5274   | 0.70900905 |
| YJL171c | YJL171c | 0.91827  | 0.574075 | 0.770448801 | 0.575264 | 0.72329492 |
| YGR036c | CAX4    | 0.918131 | 0.846772 | 0.587437738 | 0.657002 | 0.61969153 |
| YMR226c | YMR226c | 0.915643 | 0.874634 | 1.227241358 | 0.766636 | 0.58270811 |
| YGL068w | MNP1    | 0.915573 | 0.731324 | 0.911531176 | 0.603081 | 0.56400319 |
| YKR007w | MEH1    | 0.91385  | 0.706329 | 0.890677125 | 0.668065 | 0.60888395 |
| YOR343c | YOR343c | 0.912954 | 1.289319 | 1.096605446 | 0.644012 | 0.59069566 |
| YJL208c | NUC1    | 0.91275  | 0.410312 | 0.680976923 | 0.845311 | 1.02229875 |
| YKL208w | CBT1    | 0.909457 | 0.865225 | 0.907610579 | 0.640448 | 0.56477346 |
| YBR115c | LYS2    | 0.905744 | 1.304115 | 0.972380499 | 1.932114 | 1.74705696 |
| YBR268w | MRPL37  | 0.905343 | 0.834049 | 0.863183125 | 0.807808 | 0.52063354 |
| YOR298w | MUM3    | 0.90529  | 0.964797 | 0.539646926 | 1.253671 | 1.63147136 |
| YNR059w | MNT4    | 0.905139 | 0.782895 | 0.673222054 | 0.65153  | 0.55724346 |
| YLR348c | DIC1    | 0.905033 | 1.877503 | 1.257787587 | 0.247006 | 0.22386648 |
| YDR317w | HIM1    | 0.903145 | 1.120372 | 1.043245424 | 2.526102 | 1.50618078 |
| YFL044c | OTU1    | 0.902118 | 0.912962 | 0.750030486 | 0.582511 | 0.4596819  |
| YFL031w | HAC1    | 0.902023 | 1.659599 | 0.700212999 | 1.541828 | 1.81613286 |



|         |         |          |          |             |          |            |
|---------|---------|----------|----------|-------------|----------|------------|
| YPR103w | PRE2    | 0.899773 | 1.118126 | 1.061249393 | 0.699954 | 0.57166896 |
| YMR222c | FSH2    | 0.898831 | 0.961916 | 1.139012183 | 0.571055 | 0.51966577 |
| YNL281w | HCH1    | 0.8985   | 0.661469 | 0.874508166 | 0.567207 | 0.59189315 |
| YJR113c | RSM7    | 0.898165 | 1.804891 | 0.915843657 | 0.77134  | 0.69165779 |
| YGL088w | YGL088w | 0.897147 | 0.759512 | 0.962576805 | 0.401684 | 0.46513122 |
| YOR265w | RBL2    | 0.896879 | 0.914266 | 0.814468978 | 0.628448 | 0.52980742 |
| YGL050w | TYW3    | 0.896005 | 0.729468 | 0.7659431   | 0.477976 | 0.55186816 |
| YDR373w | FRQ1    | 0.895277 | 0.564792 | 0.828138937 | 0.676629 | 0.69249211 |
| YGL083w | SCY1    | 0.89493  | 0.803968 | 0.751583874 | 0.422824 | 0.44739869 |
| YDR258c | HSP78   | 0.893814 | 1.158086 | 0.611154662 | 0.874088 | 1.03933704 |
| YJL145w | SFH5    | 0.893743 | 0.463086 | 0.90791211  | 0.590979 | 0.66179269 |
| YDR181c | SAS4    | 0.89363  | 1.334701 | 1.026806969 | 2.137309 | 1.55454379 |
| YDR063w | YDR063w | 0.89348  | 1.082068 | 1.013626516 | 0.731549 | 0.55488148 |
| YGL150c | INO80   | 0.892858 | 0.37039  | 1.128388619 | 0.929963 | 1.05920061 |
| YLR226w | BUR2    | 0.892614 | 0.997078 | 0.556572659 | 1.245612 | 1.22576581 |
| YCR090c | YCR090c | 0.89133  | 0.504952 | 1.122313989 | 0.462327 | 0.49602655 |
| YOR147w | MDM32   | 0.890949 | 1.301553 | 1.091982106 | 1.963365 | 2.20842349 |
| YLR384c | IKI3    | 0.890579 | 1.254893 | 0.577373143 | 2.045655 | 2.05742808 |
| YDR344c | YDR344c | 0.889838 | 0.652869 | 0.778578905 | 0.715267 | 0.5874087  |
| YLR390w | ECM19   | 0.88928  | 1.108426 | 1.09933029  | 0.568246 | 0.48594845 |
| YGR034w | RPL26b  | 0.888891 | 0.468293 | 0.921568438 | 0.812754 | 0.92589733 |
| YKL214c | YRA2    | 0.887344 | 0.7656   | 0.97335868  | 0.664564 | 0.56243698 |
| YPL004c | LSP1    | 0.886109 | 2.557375 | 1.377968575 | 1.458064 | 1.04680147 |
| YKL157w | APE2    | 0.885464 | 1.253923 | 1.634720951 | 3.125608 | 2.73012026 |
| YDL088c | ASM4    | 0.885039 | 1.758688 | 0.939885406 | 1.734483 | 2.07479739 |
| YDR252w | BTT1    | 0.878554 | 0.737195 | 0.592470736 | 0.753579 | 0.90757799 |
| YKR104w | YKR104w | 0.875369 | 2.165482 | 0.821734976 | 0.990752 | 0.95995871 |
| YGR175c | ERG1    | 0.875328 | 0.494008 | 0.88313595  | 1.976131 | 1.64536618 |
| YOR084w | LPX1    | 0.873389 | 2.064529 | 1.044712819 | 1.332097 | 1.61602172 |
| YMR260c | TIF11   | 0.872918 | 0.423816 | 1.002234219 | 0.758007 | 0.81019004 |
| YPR002w | PDH1    | 0.872282 | 1.801962 | 1.150681686 | 1.23255  | 1.40445712 |
| YMR205c | PFK2    | 0.871148 | 1.019337 | 1.115071885 | 2.122649 | 2.09409412 |
| YGL193c | YGL193c | 0.86851  | 2.170821 | 0.868913719 | 1.12008  | 1.0466081  |
| YOR020c | HSP10   | 0.868443 | 0.811645 | 0.859046163 | 0.659749 | 0.57413497 |
| YCL059c | KRR1    | 0.866881 | 0.544439 | 1.091487925 | 0.889496 | 1.07810441 |
| YHR010w | RPL27a  | 0.866792 | 0.491852 | 1.167798279 | 0.890682 | 0.84595964 |
| YOR132w | VPS17   | 0.86591  | 1.822161 | 1.05624966  | 2.015206 | 1.69083343 |

|         |         |          |          |             |          |            |
|---------|---------|----------|----------|-------------|----------|------------|
| YDR441c | APT2    | 0.86494  | 0.883906 | 0.771069053 | 0.597924 | 0.60212801 |
| YPR187w | RPO26   | 0.864447 | 0.573295 | 0.802939882 | 0.800473 | 0.89078554 |
| YER094c | PUP3    | 0.864289 | 0.895419 | 1.061181586 | 0.728548 | 0.59168936 |
| YGR071c | YGR071c | 0.860096 | 0.50749  | 0.686590507 | 0.706269 | 0.75221168 |
| YGL178w | MPT5    | 0.857189 | 1.053806 | 0.953327622 | 1.217304 | 2.0270794  |
| YIL027c | KRE27   | 0.856915 | 0.58004  | 0.82503213  | 0.621457 | 0.64289394 |
| YLR301w | YLR301w | 0.856655 | 0.386973 | 0.913120699 | 0.780463 | 0.80234863 |
| YNL189w | SRP1    | 0.854188 | 1.153382 | 1.201027105 | 2.476522 | 2.38401066 |
| YLR176c | RFX1    | 0.854055 | 1.844708 | 0.853571892 | 1.250283 | 1.36490661 |
| YDR038c | ENA5    | 0.853314 | 2.461053 | 0.819962558 | 1.900985 | 1.97909257 |
| YGL199c | YGL199c | 0.853068 | 0.866961 | 1.522255425 | 2.549231 | 2.69348127 |
| YDR080w | VPS41   | 0.85296  | 1.100896 | 0.819513567 | 1.376387 | 1.7119853  |
| YIL010w | DOT5    | 0.85265  | 0.803999 | 1.051334693 | 0.857093 | 0.60091778 |
| YML015c | TAF11   | 0.852546 | 0.939241 | 0.589140127 | 1.266552 | 1.06605872 |
| YOR270c | VPH1    | 0.852504 | 1.01629  | 0.963128836 | 2.22614  | 1.97387035 |
| YLR229c | CDC42   | 0.852264 | 0.901774 | 1.055776459 | 0.662799 | 0.59786474 |
| YLR312c | YLR312c | 0.85115  | 2.61622  | 0.919998122 | 1.304213 | 1.22069719 |
| YJL119c | YJL119c | 0.851146 | 1.053147 | 0.591775372 | 0.86596  | 0.87144431 |
| YDR365c | ESF1    | 0.849805 | 1.026354 | 0.808129699 | 1.330044 | 1.89173166 |
| YDR086c | SSS1    | 0.84823  | 0.506525 | 0.956777199 | 0.657765 | 0.5702807  |
| YPL243w | SRP68   | 0.847612 | 1.221917 | 0.952009721 | 1.766812 | 2.15986687 |
| YNL251c | NRD1    | 0.8469   | 2.384515 | 0.86795815  | 1.346892 | 1.41186985 |
| YHR086w | NAM8    | 0.846723 | 1.071055 | 0.627883132 | 0.928375 | 0.9829807  |
| YPL237w | SUI3    | 0.845951 | 0.558454 | 0.831233431 | 0.872414 | 0.8300391  |
| YCL066w | YCL066w | 0.845358 | 0.867052 | 0.896864939 | 0.539042 | 0.55818486 |
| YNL158w | PGA1    | 0.84523  | 1.329874 | 1.036456216 | 1.86439  | 1.71432915 |
| YJR045c | SSC1    | 0.845125 | 1.561729 | 1.194351336 | 1.854203 | 2.13084738 |
| YLR038c | COX12   | 0.843475 | 1.172692 | 1.013018589 | 0.762909 | 0.63417924 |
| YHR179w | OYE2    | 0.842665 | 0.569122 | 0.897691007 | 1.334357 | 1.03619839 |
| YNL178w | RPS3    | 0.842412 | 0.399799 | 2.049122701 | 0.953115 | 0.71632982 |
| YDR471w | RPL27b  | 0.837635 | 0.359723 | 0.994323169 | 0.754191 | 0.72568509 |
| YML106w | URA5    | 0.836107 | 0.510403 | 0.866712275 | 1.087804 | 1.14462722 |
| YLR351c | NIT3    | 0.835963 | 0.589281 | 0.962109698 | 0.947783 | 1.07277865 |
| YNR075w | COS10   | 0.834841 | 0.566802 | 0.790273098 | 0.689393 | 0.75989152 |
| YGL056c | SDS23   | 0.83423  | 1.443261 | 0.875846851 | 1.636328 | 2.11879805 |
| YHR049w | FSH1    | 0.832859 | 0.681925 | 1.277562385 | 0.584741 | 0.48566585 |
| YJL009w | YJL009w | 0.832419 | 0.970396 | 0.521360926 | 0.837309 | 0.9699895  |

|         |         |          |          |             |          |            |
|---------|---------|----------|----------|-------------|----------|------------|
| YJR063w | RPA12   | 0.831916 | 0.573813 | 0.9124112   | 0.855007 | 0.89621764 |
| YMR097c | MTG1    | 0.829757 | 0.381313 | 0.204894108 | 1.306217 | 1.46812831 |
| YBR083w | TEC1    | 0.825632 | 1.367719 | 0.740198    | 0.827776 | 0.87500704 |
| YNL106c | INP52   | 0.825546 | 0.610568 | 0.838677522 | 0.604646 | 0.66169952 |
| YCR003w | MRPL32  | 0.82483  | 0.664704 | 0.741883855 | 0.588939 | 0.58144013 |
| YDR006c | SOK1    | 0.822103 | 1.791369 | 0.666850387 | 1.767164 | 2.12301433 |
| YMR246w | FAA4    | 0.821239 | 1.097093 | 1.008301857 | 3.322642 | 3.08921388 |
| YDR039c | ENA2    | 0.821164 | 2.735788 | 0.811351897 | 1.986568 | 2.07748923 |
| YGL245w | GUS1    | 0.820279 | 0.77078  | 1.59406204  | 2.989203 | 2.80386354 |
| YMR132c | JLP2    | 0.82027  | 0.57528  | 0.700391991 | 0.72377  | 0.6485203  |
| YDR043c | NRG1    | 0.819926 | 1.51443  | 0.440444056 | 0.787505 | 0.96309735 |
| YJL188c | BUD19   | 0.81853  | 0.440563 | 1.079879325 | 0.868815 | 0.73812148 |
| YPR113w | PIS1    | 0.818265 | 0.730677 | 0.591755423 | 0.812943 | 0.77145883 |
| YDR330w | UBX5    | 0.817635 | 1.09331  | 0.843739878 | 2.080098 | 3.13088177 |
| YGL087c | MMS2    | 0.817607 | 0.929952 | 0.929676652 | 0.610841 | 0.56339512 |
| YBL018c | POP8    | 0.815989 | 0.47818  | 0.656054823 | 0.659455 | 0.60879901 |
| YDL063c | YDL063c | 0.815212 | 0.772639 | 1.170581822 | 2.025443 | 2.56196219 |
| YLR123c | YLR123c | 0.814956 | 1.04887  | 0.698415007 | 0.62857  | 0.54420307 |
| YML055w | SPC2    | 0.814364 | 0.469403 | 0.733062697 | 0.693044 | 0.60668252 |
| YKL128c | PMU1    | 0.813983 | 0.475597 | 0.861314231 | 1.052292 | 1.14046904 |
| YEL071w | DLD3    | 0.813207 | 0.482603 | 0.924396888 | 0.474775 | 0.79383045 |
| YMR225c | MRPL44  | 0.813085 | 0.796802 | 1.051925416 | 0.644737 | 0.53866173 |
| YFR050c | PRE4    | 0.81149  | 0.984542 | 0.763598853 | 0.608638 | 0.60865442 |
| YNL239w | LAP3    | 0.808111 | 1.226508 | 1.062750324 | 2.104139 | 1.76014298 |
| YCR015c | YCR015c | 0.806703 | 0.630234 | 0.644468229 | 0.930954 | 1.00539835 |
| YJL121c | RPE1    | 0.803919 | 0.463327 | 0.809053454 | 0.782764 | 0.61633009 |
| YGL089c | YGL089c | 0.803668 | 0.210449 | 1.007403469 | 0.078002 | 0.10962229 |
| YDR492w | IZH1    | 0.802866 | 0.766088 | 0.55425143  | 0.925399 | 0.89119844 |
| Unknown | Unknown | 0.79799  | 0.52605  | 0.642654645 | 0.850208 | 0.96261135 |
| YER035w | EDC2    | 0.797786 | 1.128981 | 0.691294309 | 0.515397 | 0.49003295 |
| YHR143w | DSE2    | 0.796293 | 0.607177 | 0.859571682 | 0.866679 | 0.90260188 |
| YDL205c | HEM3    | 0.796128 | 1.114554 | 0.581988047 | 0.902846 | 0.99947268 |
| YLR172c | DPH5    | 0.795633 | 0.593248 | 1.011844881 | 1.234488 | 1.04661013 |
| YCR040w | YCR040w | 0.793656 | 0.817703 | 0.912069249 | 0.540677 | 0.51921494 |
| YLR356w | YLR356w | 0.793018 | 1.825236 | 0.96729937  | 1.064143 | 0.91659196 |
| YDR534c | FIT1    | 0.792691 | 2.031176 | 0.915351989 | 1.140148 | 0.97429594 |
| YLL029w | FRA1    | 0.792586 | 1.5397   | 0.801316958 | 1.895435 | 2.5279221  |

|         |         |          |          |             |          |            |
|---------|---------|----------|----------|-------------|----------|------------|
| YPR074c | TKL1    | 0.78826  | 0.579637 | 0.88977583  | 1.449159 | 1.68387737 |
| YJR105w | ADO1    | 0.786237 | 0.611598 | 0.9171453   | 1.064481 | 0.93026806 |
| YER165w | PAB1    | 0.782458 | 1.168415 | 0.895387793 | 2.269865 | 2.52980254 |
| YOR133w | EFT1    | 0.780876 | 1.368101 | 1.438503299 | 3.27782  | 3.0997315  |
| YOR133W | Unknown | 0.780457 | 0.569538 | 0.775181398 | 0.742809 | 0.84202434 |
| YFR038w | IRC5    | 0.780374 | 1.261654 | 0.565229146 | 1.116506 | 1.39574147 |
| YBL048w | YBL048w | 0.779864 | 0.832094 | 0.51297     | 0.579209 | 0.64009122 |
| YGL030w | RPL30   | 0.779726 | 2.619326 | 0.592516853 | 2.616133 | 2.68012838 |
| YPL274w | SAM3    | 0.779603 | 0.660514 | 0.487179483 | 0.584918 | 0.49507776 |
| YGL039w | YGL039w | 0.778641 | 0.460752 | 0.778867999 | 0.940402 | 0.88793469 |
| YLR022c | SDO1    | 0.778607 | 0.641067 | 0.688200105 | 1.009805 | 1.17494373 |
| YPL126w | NAN1    | 0.778599 | 1.071645 | 1.165966252 | 1.869575 | 2.4331592  |
| YDR515w | SLF1    | 0.777452 | 0.925936 | 0.476506103 | 0.616232 | 0.63364941 |
| YMR018w | YMR018w | 0.776513 | 0.908649 | 0.568700003 | 0.983325 | 0.92410434 |
| YLR036c | YLR036c | 0.776481 | 1.073724 | 0.905325999 | 0.526475 | 0.55646563 |
| YDR151c | CTH1    | 0.774761 | 1.184145 | 0.549507481 | 1.311354 | 1.56979173 |
| YEL066w | HPA3    | 0.774149 | 0.607465 | 0.679883266 | 0.484372 | 0.4743195  |
| YLR011w | LOT6    | 0.773957 | 0.621371 | 0.792320757 | 0.5219   | 0.46946226 |
| YAR075w | YAR075w | 0.772566 | 0.641209 | 0.840678571 | 1.248579 | 1.68200336 |
| YCL065w | YCL065w | 0.771453 | 0.684152 | 0.781763768 | 0.439351 | 0.47615184 |
| YGR157w | CHO2    | 0.771173 | 1.056453 | 1.015846246 | 2.721348 | 2.3998063  |
| YLR012c | YLR012c | 0.770927 | 0.74374  | 0.669409885 | 0.501127 | 0.52702228 |
| YML125c | PGA3    | 0.770868 | 0.590528 | 0.902991442 | 0.97507  | 0.9794249  |
| YDR129c | SAC6    | 0.767844 | 1.590748 | 1.369555207 | 2.648746 | 2.3705641  |
| YDR322w | MRPL35  | 0.7677   | 0.404964 | 0.884432611 | 1.10879  | 1.09197011 |
| YDR410c | STE14   | 0.764253 | 0.555415 | 0.616451775 | 0.58593  | 0.62119933 |
| YDR476c | YDR476c | 0.763562 | 0.737185 | 0.795195379 | 0.624944 | 0.57409818 |
| YFL011w | HXT10   | 0.763295 | 2.31921  | 0.999102763 | 0.827952 | 0.90694597 |
| YPL185w | YPL185w | 0.763021 | 1.002424 | 0.599511934 | 0.633423 | 0.66112014 |
| YDL185w | TFP1    | 0.762092 | 0.957617 | 1.050161638 | 3.074509 | 3.023714   |
| YMR314w | PRE5    | 0.761913 | 0.971795 | 0.806514045 | 0.771922 | 0.58241268 |
| YLR065c | YLR065c | 0.761896 | 0.919444 | 0.653308787 | 0.938432 | 1.03418004 |
| YBR029c | CDS1    | 0.761546 | 1.243749 | 0.568757356 | 1.240284 | 1.30649163 |
| YNL211c | YNL211c | 0.760524 | 0.793816 | 0.818365092 | 0.623072 | 0.51543361 |
| YKL160w | ELF1    | 0.760305 | 0.625297 | 0.777967738 | 0.550978 | 0.47110965 |
| YDR140w | MTQ2    | 0.759134 | 0.719928 | 0.604719597 | 0.722762 | 0.80473086 |
| YIL032c | YIL032c | 0.758501 | 0.578364 | 0.907231167 | 1.473814 | 1.65059942 |

|         |         |          |          |             |          |            |
|---------|---------|----------|----------|-------------|----------|------------|
| YAL046c | YAL046c | 0.758433 | 0.601435 | 0.763125287 | 0.639628 | 0.59613934 |
| YIL133c | RPL16a  | 0.755431 | 0.482103 | 1.222852838 | 0.775875 | 0.98984608 |
| YOR021c | YOR021c | 0.75428  | 0.546613 | 0.753576388 | 1.084595 | 1.20158029 |
| YBR011c | IPP1    | 0.754228 | 0.51765  | 0.924515099 | 1.043308 | 0.97531729 |
| YNR017w | TIM23   | 0.753828 | 0.94131  | 0.823347101 | 1.065764 | 0.61548968 |
| YHR060w | VMA22   | 0.753513 | 0.532408 | 0.655848815 | 0.732297 | 0.69247078 |
| YLR432w | IMD3    | 0.752746 | 0.749183 | 1.173871931 | 2.369628 | 2.61399224 |
| YLR060w | FRS1    | 0.752529 | 0.667796 | 1.238048473 | 2.045787 | 2.32465903 |
| YLR125w | YLR125w | 0.751927 | 0.933206 | 0.665598094 | 1.103793 | 1.02967852 |
| YLL009c | COX17   | 0.751304 | 0.803933 | 0.848653744 | 0.429591 | 0.38103575 |
| YCR041w | YCR041w | 0.750594 | 0.691383 | 0.731534379 | 0.431748 | 0.50088756 |
| YEL038w | UTR4    | 0.750243 | 0.835487 | 0.723782907 | 0.601799 | 0.5683748  |
| YEL038W | Unknown | 0.749885 | 1.015813 | 0.575188079 | 1.016273 | 1.16952914 |
| YIL082W | Unknown | 0.749124 | 0.550109 | 0.653698877 | 0.647605 | 0.59339798 |
| YNL209w | SSB2    | 0.748418 | 0.7709   | 1.581145146 | 2.147925 | 2.14026575 |
| YIL078w | THS1    | 0.748393 | 0.528361 | 0.871468464 | 1.351355 | 1.68400119 |
| YMR219w | ESC1    | 0.748291 | 0.738198 | 1.209770201 | 2.083599 | 2.09069146 |
| YDR034c | LYS14   | 0.748095 | 0.925077 | 0.572330102 | 1.508701 | 2.04907727 |
| YOR129c | AFI1    | 0.747592 | 0.953432 | 0.560893816 | 1.162312 | 1.21738322 |
| YLL035w | GRC3    | 0.747486 | 0.843871 | 0.846812167 | 2.181398 | 2.42839489 |
| YIL175w | YIL175w | 0.747102 | 0.759655 | 0.756606565 | 0.569877 | 0.66988292 |
| YLR175w | CBF5    | 0.74664  | 0.562732 | 1.073521555 | 1.755872 | 2.28768698 |
| YHL011c | PRS3    | 0.746072 | 0.566488 | 0.621608739 | 1.185908 | 1.41486886 |
| YDL138w | RGT2    | 0.744241 | 0.751437 | 0.587695956 | 0.999926 | 0.8951478  |
| YOR056c | NOB1    | 0.741211 | 1.434414 | 0.591486578 | 1.405939 | 1.25309324 |
| YFR047c | BNA6    | 0.740068 | 0.504226 | 0.920440716 | 0.74959  | 0.83631187 |
| YBR121c | GRS1    | 0.738831 | 0.527441 | 1.104634487 | 1.185608 | 1.52732714 |
| YBR172c | SMY2    | 0.738588 | 0.713261 | 0.536894805 | 0.784667 | 0.91255138 |
| YIR011c | STS1    | 0.737093 | 1.984577 | 0.588142173 | 1.409734 | 1.47309852 |
| YLR453c | RIF2    | 0.735283 | 0.536778 | 0.672901961 | 0.657586 | 0.61057201 |
| YDR087c | RRP1    | 0.734587 | 0.568604 | 1.040414899 | 0.830039 | 1.03310062 |
| YPR168w | NUT2    | 0.734199 | 0.94677  | 0.593971562 | 1.076972 | 0.95616    |
| YGR054w | YGR054w | 0.733337 | 0.987416 | 0.848133839 | 2.097216 | 2.25505262 |
| YDR415c | YDR415c | 0.732925 | 0.530486 | 0.868080389 | 0.662923 | 0.69937767 |
| Unknown | Unknown | 0.731858 | 0.529087 | 1.084610401 | 0.784107 | 0.72989997 |
| YLR407w | YLR407w | 0.731147 | 0.641157 | 0.512470651 | 0.954324 | 0.99095745 |
| YCL064c | CHA1    | 0.730189 | 0.349845 | 0.461986588 | 0.711884 | 0.9996874  |

|           |         |          |          |             |          |            |
|-----------|---------|----------|----------|-------------|----------|------------|
| YLR021w   | IRC25   | 0.730185 | 0.600862 | 0.718797458 | 0.812206 | 0.75384766 |
| YDL158c   | YDL158c | 0.729323 | 0.497926 | 0.582729803 | 0.659291 | 0.55854004 |
| YBL026w   | LSM2    | 0.729076 | 0.535579 | 0.646247221 | 0.5991   | 0.56091627 |
| YCR060w   | TAH1    | 0.727787 | 0.678467 | 0.552675771 | 0.416038 | 0.51530333 |
| YGL067w   | NPY1    | 0.727691 | 0.772652 | 0.76759856  | 1.70819  | 1.95855991 |
| YGR131w   | YGR131w | 0.726034 | 0.427762 | 0.693849621 | 1.117564 | 1.13729999 |
| YHR216w   | IMD2    | 0.725898 | 0.763657 | 1.152488331 | 2.492092 | 2.6663737  |
| YFL046w   | FMP32   | 0.724704 | 0.620869 | 0.47508329  | 1.114367 | 1.08987562 |
| YJR135c   | MCM22   | 0.724279 | 0.490776 | 0.525433844 | 0.64359  | 0.65830661 |
| YJR011c   | YJR011c | 0.72393  | 0.427035 | 0.674123095 | 0.930377 | 0.89900385 |
| YFL034C-B | RPL22B  | 0.723801 | 0.545942 | 0.757813906 | 0.681766 | 0.79676089 |
| YJL125c   | GCD14   | 0.723683 | 1.114314 | 0.554138875 | 1.34338  | 1.71245866 |
| YIL008w   | URM1    | 0.719852 | 0.571631 | 0.71357734  | 0.781592 | 0.58596868 |
| YLR066w   | SPC3    | 0.719357 | 0.547541 | 0.948583455 | 0.959124 | 0.79054096 |
| YBL055c   | YBL055c | 0.718774 | 0.789767 | 0.75796789  | 2.424528 | 1.18369659 |
| YJR025c   | BNA1    | 0.718739 | 0.118735 | 0.262553528 | 0.397035 | 0.50820547 |
| YDR075w   | PPH3    | 0.717746 | 0.766198 | 0.566391187 | 1.207622 | 1.38675938 |
| YPR073c   | LTP1    | 0.717418 | 0.482603 | 0.893911451 | 0.790262 | 0.61701575 |
| YGR035c   | YGR035c | 0.7167   | 2.447546 | 1.10861317  | 2.38796  | 1.7742553  |
| YDR308c   | SRB7    | 0.71652  | 0.696112 | 1.036075685 | 1.675608 | 1.87292104 |
| YDR385w   | EFT2    | 0.715705 | 1.113354 | 1.578185928 | 3.734808 | 4.29863557 |
| YKR058w   | GLG1    | 0.715466 | 1.901252 | 0.994782856 | 1.764454 | 1.6256675  |
| YAR073w   | IMD1    | 0.715427 | 0.836556 | 1.180020707 | 2.594256 | 2.71917743 |
| YOR213c   | SAS5    | 0.71391  | 1.001283 | 0.58983323  | 1.481048 | 1.56670852 |
| YJR082c   | EAF6    | 0.712272 | 0.688743 | 0.556474549 | 1.068307 | 1.04512988 |
| YNR024w   | MPP6    | 0.712264 | 0.703005 | 0.584073663 | 0.924601 | 0.99041567 |
| YDL156w   | YDL156w | 0.711701 | 0.545934 | 0.769631601 | 0.688296 | 0.71736729 |
| YKL216w   | URA1    | 0.710642 | 0.342917 | 0.999643597 | 1.162226 | 1.04886865 |
| YKL084w   | HOT13   | 0.710461 | 0.861442 | 0.769488864 | 0.570746 | 0.53175378 |
| YNL151c   | RPC31   | 0.710255 | 0.567003 | 0.668577799 | 0.651819 | 0.79801492 |
| YIL030c   | SSM4    | 0.709704 | 0.541769 | 0.543606747 | 0.696528 | 0.69922357 |
| YKL069w   | YKL069w | 0.706743 | 0.443523 | 0.617782309 | 0.392425 | 0.27089482 |
| YPR062w   | FCY1    | 0.706408 | 0.565588 | 0.56064212  | 0.717303 | 0.73246583 |
| YKL181w   | PRS1    | 0.703604 | 1.018862 | 1.163990879 | 2.552032 | 2.39211143 |
| YLR015w   | BRE2    | 0.703348 | 1.028638 | 0.603500104 | 1.351873 | 1.24103289 |
| YGL078c   | DBP3    | 0.702882 | 0.60565  | 0.763306776 | 1.335591 | 1.37870596 |
| YGR001c   | YGR001c | 0.702682 | 0.365893 | 0.752638152 | 1.057758 | 1.16225933 |

|         |         |          |          |             |          |            |
|---------|---------|----------|----------|-------------|----------|------------|
| YLR122c | YLR122c | 0.702355 | 1.003282 | 0.66993031  | 0.561418 | 0.50911551 |
| YKL050c | YKL050c | 0.701685 | 1.83325  | 0.540150204 | 1.241893 | 1.53251831 |
| YPL135w | ISU1    | 0.701054 | 2.009724 | 0.685652042 | 1.749364 | 1.5576737  |
| YIL064w | SEE1    | 0.700834 | 0.420949 | 0.586223206 | 0.522334 | 0.5303362  |
| YBR165w | UBS1    | 0.700077 | 0.847012 | 0.522266165 | 1.43839  | 1.45336619 |
| YDL053c | PBP4    | 0.698193 | 0.774258 | 0.576955476 | 0.633511 | 0.64228068 |
| YER040w | GLN3    | 0.697382 | 0.817814 | 0.523615253 | 1.17798  | 1.42273493 |
| YJR004c | SAG1    | 0.694922 | 0.349145 | 1.196361174 | 0.265989 | 0.32004344 |
| YJL001w | PRE3    | 0.693666 | 0.778082 | 0.864499646 | 0.62946  | 0.49798137 |
| YLR405w | DUS4    | 0.692939 | 0.87476  | 0.514218138 | 1.143388 | 1.12732548 |
| YGR251w | YGR251w | 0.691823 | 0.627356 | 0.532604423 | 0.880235 | 0.72691085 |
| YDL121c | YDL121c | 0.688765 | 0.304598 | 0.438691873 | 0.724227 | 0.62251824 |
| YIL145c | PAN6    | 0.688701 | 0.514389 | 0.628079214 | 0.65178  | 0.6910116  |
| YIR018w | YAP5    | 0.688374 | 0.686326 | 0.380619331 | 0.519927 | 0.58252049 |
| YHR046c | INM1    | 0.686548 | 0.486989 | 0.558402502 | 0.852207 | 1.12067811 |
| YDR120c | TRM1    | 0.686438 | 0.730866 | 0.953280575 | 1.696152 | 1.89505455 |
| YOR306c | MCH5    | 0.685952 | 0.717468 | 0.580410202 | 1.175245 | 1.33330815 |
| YDR076w | RAD55   | 0.683124 | 0.66482  | 0.520569567 | 0.876361 | 0.86875812 |
| YMR019w | STB4    | 0.680483 | 0.888841 | 0.620704737 | 1.371981 | 1.29463125 |
| YPL093w | NOG1    | 0.679344 | 0.671528 | 0.937962516 | 2.145384 | 2.18687225 |
| YFR001w | LOC1    | 0.679209 | 0.425835 | 0.585359288 | 0.714593 | 0.69489192 |
| YIL020c | HIS6    | 0.678707 | 0.532021 | 0.599233615 | 0.705202 | 0.79021105 |
| YNR027w | BUD17   | 0.676    | 0.64732  | 0.586342098 | 1.392851 | 1.80811993 |
| YJL048c | UBX6    | 0.674818 | 1.535199 | 0.628384892 | 1.390002 | 1.53515051 |
| YMR135c | GID8    | 0.671995 | 2.247392 | 0.886224423 | 1.53365  | 1.71634955 |
| YBL049w | MOH1    | 0.671713 | 0.642548 | 0.575066215 | 2.041117 | 0.74213529 |
| YGR055w | MUP1    | 0.671068 | 0.919462 | 0.378432612 | 0.626239 | 0.70044501 |
| YIL006w | YIA6    | 0.669825 | 0.457948 | 0.595245107 | 0.681127 | 0.53597847 |
| YFL055w | AGP3    | 0.668994 | 0.841775 | 0.803746001 | 0.450073 | 0.37241251 |
| YKL144c | RPC25   | 0.668928 | 0.541298 | 0.803705902 | 1.167445 | 1.08186353 |
| YBR296c | PHO89   | 0.668081 | 1.646356 | 0.635717475 | 2.471049 | 2.72209192 |
| YBL090w | MRP21   | 0.665729 | 0.6925   | 0.759432207 | 0.656181 | 0.60492728 |
| YJL072c | PSF2    | 0.664868 | 0.569576 | 0.559490107 | 0.986553 | 0.82624864 |
| YHR071w | PCL5    | 0.664207 | 0.784886 | 0.312809121 | 1.147018 | 1.10558662 |
| YER171w | RAD3    | 0.663384 | 0.500677 | 0.648289609 | 0.72666  | 0.76010248 |
| YLR170c | APS1    | 0.662324 | 0.515199 | 0.627915788 | 0.724463 | 0.66297012 |
| YBR043c | QDR3    | 0.661738 | 1.47906  | 0.598150912 | 2.53728  | 2.77254434 |

|         |         |          |          |             |          |            |
|---------|---------|----------|----------|-------------|----------|------------|
| Q0110   | BI2     | 0.66137  | 1.235655 | 0.919839984 | 2.888285 | 2.30442866 |
| YJR014w | TMA22   | 0.661217 | 0.47519  | 0.653765032 | 0.540675 | 0.48724213 |
| YKL125w | RRN3    | 0.660925 | 0.447091 | 0.551506294 | 0.583673 | 0.69072295 |
| YKL082c | RRP14   | 0.660024 | 0.762938 | 0.438675793 | 1.090995 | 1.4307927  |
| YIR033w | MGA2    | 0.659659 | 0.599172 | 0.516859355 | 0.704326 | 0.71564619 |
| YKR063c | LAS1    | 0.659393 | 0.653216 | 0.49439112  | 1.320903 | 1.42688929 |
| YBR173c | UMP1    | 0.659137 | 0.682615 | 0.599619954 | 0.678633 | 0.69768935 |
| YML001w | YPT7    | 0.658901 | 0.504062 | 0.701299376 | 0.810074 | 0.68762056 |
| YDR121w | DPB4    | 0.658354 | 0.686439 | 0.529761527 | 0.751477 | 0.68531728 |
| YLR343w | GAS2    | 0.658104 | 0.750028 | 0.530211231 | 0.514945 | 0.6879163  |
| YMR217w | GUA1    | 0.655496 | 0.519635 | 1.345623672 | 2.298235 | 2.6205034  |
| YER176w | ECM32   | 0.654952 | 0.799136 | 0.473200708 | 1.12126  | 1.51363586 |
| YER024w | YAT2    | 0.654258 | 1.68376  | 0.520117952 | 1.419085 | 2.14967293 |
| YBR046c | ZTA1    | 0.652934 | 0.783426 | 0.608615075 | 0.863439 | 0.87622953 |
| YDR098c | GRX3    | 0.652052 | 0.506431 | 0.656044304 | 0.394847 | 0.47566847 |
| YDL116w | NUP84   | 0.651183 | 0.998714 | 0.962176809 | 2.011088 | 1.65555626 |
| YMR309c | NIP1    | 0.650554 | 0.596248 | 0.707162928 | 1.734689 | 2.02391752 |
| YNL247w | YNL247w | 0.650199 | 0.750171 | 1.121949665 | 2.808578 | 3.08945049 |
| YNL113w | RPC19   | 0.648708 | 0.435551 | 0.63736224  | 0.812174 | 1.04840471 |
| YDL187c | YDL187c | 0.647549 | 0.80153  | 0.567222287 | 0.390484 | 0.44071062 |
| YMR127c | SAS2    | 0.646332 | 0.911063 | 0.572328305 | 1.253884 | 1.10258376 |
| YDR173c | ARG82   | 0.646183 | 0.474768 | 0.633214101 | 0.720414 | 0.91776294 |
| YGL221c | NIF3    | 0.645974 | 0.508502 | 0.682776207 | 0.873489 | 0.93726129 |
| YGR264c | MES1    | 0.645664 | 0.509241 | 0.840331443 | 2.482808 | 2.43960287 |
| YPR196w | YPR196w | 0.644285 | 0.728277 | 0.54933061  | 0.681393 | 0.79959824 |
| YHR168w | MTG2    | 0.643582 | 0.593659 | 0.55099433  | 1.356585 | 1.35052888 |
| YDR244w | PEX5    | 0.643493 | 0.465587 | 0.473918562 | 0.566365 | 0.69601135 |
| YLR068w | FYV7    | 0.641927 | 0.586296 | 0.551363879 | 0.809309 | 0.75429513 |
| YOR338w | YOR338w | 0.641247 | 0.669713 | 0.49122537  | 0.85418  | 1.09940428 |
| YOR051c | YOR051c | 0.639275 | 0.456871 | 0.637173879 | 0.724564 | 0.87080058 |
| YDR078c | SHU2    | 0.639058 | 0.727323 | 0.527721922 | 0.780761 | 0.72818692 |
| YDR164c | SEC1    | 0.637592 | 0.787626 | 0.425207925 | 0.722031 | 0.75748079 |
| YGR129w | SYF2    | 0.636963 | 0.623193 | 0.569756791 | 0.957833 | 0.89768136 |
| YLR267w | BOP2    | 0.635788 | 2.707268 | 0.675201395 | 2.101959 | 2.46504837 |
| YBR166c | TYR1    | 0.634976 | 0.72107  | 0.500393028 | 1.349623 | 1.54305933 |
| YLR452c | SST2    | 0.634385 | 0.469634 | 0.646907485 | 0.599376 | 0.56731131 |
| YDL146w | LDB17   | 0.634197 | 0.490601 | 0.750148481 | 0.597807 | 0.5898314  |



|         |         |          |          |             |          |            |
|---------|---------|----------|----------|-------------|----------|------------|
| YLR009w | RLP24   | 0.633747 | 0.535996 | 0.887428067 | 0.948865 | 0.93312146 |
| YDR261c | EXG2    | 0.633578 | 1.007715 | 0.463911772 | 0.691497 | 0.6758016  |
| YNL256w | FOL1    | 0.633363 | 0.902952 | 0.563829054 | 1.141152 | 1.09183933 |
| YCR020c | PET18   | 0.630174 | 0.365889 | 0.563942596 | 0.587224 | 0.48457867 |
| YJL070c | YJL070c | 0.629465 | 0.769735 | 0.470835426 | 0.615283 | 0.61904197 |
| YER174c | GRX4    | 0.62824  | 1.050192 | 0.624415715 | 1.715503 | 1.80033711 |
| YBR152w | SPP381  | 0.627443 | 1.003387 | 0.481583999 | 1.175029 | 1.43160061 |
| YBR258c | SHG1    | 0.626892 | 0.614993 | 0.546828373 | 0.585566 | 0.54828813 |
| YJR056c | YJR056c | 0.626802 | 1.03669  | 0.545923052 | 1.082906 | 1.28408886 |
| YMR038c | CCS1    | 0.626164 | 0.434313 | 0.640633124 | 0.650261 | 0.56053726 |
| YNL044w | YIP3    | 0.626092 | 0.540147 | 0.665449736 | 1.271782 | 0.96168713 |
| YDR307w | YDR307w | 0.623286 | 0.763038 | 0.777202788 | 2.893018 | 2.7903081  |
| YAL020c | ATS1    | 0.623064 | 0.982478 | 0.538570347 | 0.670105 | 0.90991583 |
| YBR194w | SOY1    | 0.623037 | 0.734635 | 0.635124356 | 0.612078 | 0.49405353 |
| YDR478w | SNM1    | 0.622469 | 0.464718 | 0.616252104 | 0.705781 | 0.78078541 |
| YLR152c | YLR152c | 0.622276 | 1.20429  | 0.725930525 | 1.750885 | 2.31580575 |
| YBR164c | ARL1    | 0.62143  | 0.596839 | 0.636701143 | 0.827843 | 0.73541877 |
| YKR056w | TRM2    | 0.620591 | 0.705049 | 0.50835645  | 1.347212 | 1.30377413 |
| YLR010c | TEN1    | 0.62037  | 0.912949 | 0.669022215 | 0.939389 | 0.90134401 |
| YPL148c | PPT2    | 0.61777  | 0.585633 | 0.578327224 | 0.726674 | 0.73637577 |
| YLR287c | YLR287c | 0.617335 | 0.45358  | 0.519156684 | 1.205286 | 1.14917734 |
| YDR152w | GIR2    | 0.616194 | 0.95023  | 0.667802866 | 0.83198  | 0.98125191 |
| YDR280w | RRP45   | 0.614003 | 0.601432 | 0.594208372 | 1.031985 | 1.24543437 |
| YML039w | YML039w | 0.613901 | 0.627275 | 0.641800508 | 0.797294 | 0.97660644 |
| YGR094w | VAS1    | 0.613274 | 0.595788 | 1.586516871 | 1.351784 | 1.29488874 |
| YOR323c | PRO2    | 0.613014 | 0.591826 | 0.698045979 | 2.149838 | 2.28284945 |
| YDR338c | YDR338c | 0.612795 | 0.791995 | 0.475950272 | 1.5814   | 2.14879805 |
| YDL171c | GLT1    | 0.61176  | 0.888296 | 0.464583882 | 1.240502 | 1.60043871 |
| YGL171w | ROK1    | 0.610082 | 0.840508 | 0.867361267 | 1.677225 | 2.2863792  |
| YDR212w | TCP1    | 0.610073 | 0.478469 | 0.804387979 | 0.660129 | 0.5823404  |
| YLR435w | TSR2    | 0.610027 | 0.401533 | 0.573802259 | 0.775585 | 0.74824208 |
| YNL232w | CSL4    | 0.60971  | 1.114609 | 0.715333731 | 0.842218 | 1.00244126 |
| YJR007w | SUI2    | 0.609597 | 0.661972 | 0.932958237 | 1.053323 | 1.09238427 |
| YPL033c | SRL4    | 0.607279 | 0.458678 | 0.329227236 | 1.340473 | 0.87639737 |
| YDL167c | NRP1    | 0.606745 | 0.607563 | 0.660685726 | 1.182034 | 1.38367774 |
| YLR064w | YLR064w | 0.605882 | 0.937915 | 0.687433443 | 0.827778 | 0.72391696 |
| YLL027w | ISA1    | 0.605865 | 1.294942 | 0.493116699 | 1.166474 | 1.29784951 |

|         |            |          |          |             |          |            |
|---------|------------|----------|----------|-------------|----------|------------|
| YLR007w | NSE1       | 0.605675 | 0.960412 | 0.584672534 | 1.508845 | 1.45396969 |
| YPL088w | YPL088w    | 0.605605 | 0.532286 | 0.603301811 | 0.778212 | 0.74924116 |
| YDR530c | APA2       | 0.605188 | 1.039196 | 0.605158475 | 0.9282   | 0.96611826 |
| YEL004w | YEA4       | 0.604227 | 0.564243 | 0.57227069  | 0.717135 | 0.77994015 |
| YGL071w | AFT1       | 0.604123 | 0.709432 | 0.491513879 | 1.187716 | 1.2163953  |
| YMR085w | YMR085w    | 0.602829 | 1.555653 | 0.644256723 | 1.493774 | 1.24964402 |
| YGL186c | TPN1       | 0.602771 | 0.66571  | 0.424507828 | 1.075327 | 1.27449076 |
| YCL055w | KAR4       | 0.602435 | 0.400186 | 0.440433765 | 0.421201 | 0.42854696 |
| YBR012c | YBR012c    | 0.602408 | 0.665306 | 0.612068314 | 1.028189 | 1.16521864 |
| YPL257w | YPL257w    | 0.60204  | 0.697219 | 0.573250634 | 0.633656 | 0.59246002 |
| YIL056w | VHR1       | 0.601859 | 2.942148 | 0.77997155  | 2.144738 | 2.45055672 |
| YIL127c | YIL127c    | 0.600934 | 0.593017 | 0.488502794 | 0.664525 | 0.85681606 |
| YIL103w | DPH1       | 0.60093  | 0.873068 | 0.599911375 | 1.24508  | 1.52320318 |
| YNR057c | BIO4       | 0.600726 | 0.776033 | 0.487452333 | 0.724041 | 0.73473299 |
| YLR211c | YLR211c    | 0.600223 | 0.640342 | 0.423589097 | 1.095319 | 1.10140805 |
| YOL092w | YOL092w    | 0.599884 | 0.604123 | 0.551908887 | 1.806415 | 1.74118358 |
| YNL311c | SKP2       | 0.59957  | 1.199735 | 0.618935608 | 1.748072 | 1.74929868 |
| YAL059w | ECM1       | 0.599039 | 0.601413 | 0.59167753  | 0.827168 | 0.98102354 |
| YHR163w | SOL3       | 0.598477 | 0.390646 | 0.495236209 | 1.157487 | 1.19680098 |
| YKR099w | BAS1       | 0.596794 | 0.719553 | 0.496155772 | 1.845409 | 2.01532049 |
| YDR020c | YDR020c    | 0.596358 | 0.581282 | 0.54633329  | 0.923582 | 1.0392674  |
| YLR275w | SMD2       | 0.596297 | 0.709029 | 0.497681359 | 0.878731 | 0.86985217 |
| YDR123c | INO2       | 0.593846 | 0.934782 | 0.570152008 | 2.127209 | 1.88697877 |
| YLL057c | JLP1       | 0.593372 | 0.709369 | 0.705939296 | 0.785581 | 0.82796986 |
| YKL099c | UTP11      | 0.592507 | 0.584296 | 0.647785817 | 1.262456 | 1.37911137 |
| YLR412w | BER1       | 0.592498 | 0.581145 | 0.647869732 | 0.970772 | 0.86427222 |
| YKR036c | CAF4       | 0.591486 | 0.783369 | 0.950786309 | 2.243922 | 2.53540702 |
| YPL187w | MF(ALPHA)1 | 0.591051 | 0.291388 | 0.91314204  | 0.382003 | 0.30136156 |
| YER069w | ARG5,6     | 0.59003  | 0.766883 | 0.649880922 | 1.878818 | 2.61658805 |
| YLR451w | LEU3       | 0.58983  | 0.810596 | 0.550442224 | 1.073181 | 1.15519343 |
| YML130c | ERO1       | 0.587656 | 0.530465 | 0.652583132 | 0.951105 | 1.1392498  |
| YIL050w | PCL7       | 0.587451 | 1.172443 | 0.665185441 | 0.88358  | 0.90641501 |
| YKL157W | YKL158W    | 0.587214 | 0.578717 | 0.679330072 | 0.863063 | 0.58922814 |
| YOL097c | WRS1       | 0.586821 | 0.423988 | 0.781731367 | 1.335451 | 1.34375377 |
| YIL169c | YIL169c    | 0.585874 | 0.67237  | 0.639901608 | 0.51061  | 0.48846786 |
| YIL080w | YIL080w    | 0.585157 | 0.613925 | 0.607569301 | 0.897641 | 0.97028809 |
| YOL136c | PFK27      | 0.584395 | 0.501907 | 0.442784017 | 1.11975  | 1.14223062 |

|         |         |          |          |             |          |            |
|---------|---------|----------|----------|-------------|----------|------------|
| YJR133w | XPT1    | 0.583393 | 0.5669   | 0.63845299  | 0.991322 | 0.77868623 |
| YBR034c | HMT1    | 0.583133 | 0.517889 | 0.538522974 | 1.03924  | 1.1723314  |
| YBR105c | VID24   | 0.582958 | 0.93993  | 0.510062679 | 0.844559 | 0.89433739 |
| YDR502c | SAM2    | 0.581646 | 0.418186 | 1.217112665 | 1.312516 | 0.74803604 |
| YHR047c | AAP1    | 0.579185 | 0.726849 | 0.650006093 | 2.210306 | 2.32549966 |
| YPL212c | PUS1    | 0.578985 | 0.802196 | 0.55539651  | 1.282636 | 1.59206197 |
| YDL157c | YDL157c | 0.578125 | 0.291384 | 0.5903598   | 0.615384 | 0.56556181 |
| YDR361c | BCP1    | 0.575262 | 0.47964  | 0.676573319 | 1.029528 | 1.09078379 |
| YGR239c | PEX21   | 0.574784 | 0.828998 | 0.498551175 | 1.935495 | 1.70000657 |
| YNR069c | BSC5    | 0.57382  | 0.73663  | 0.63442426  | 1.322555 | 1.26847407 |
| YNL057w | YNL057w | 0.573002 | 0.994826 | 0.769280231 | 1.27351  | 1.11105793 |
| YPL106c | SSE1    | 0.572973 | 0.757725 | 0.881790736 | 2.789199 | 2.38759575 |
| YGR286c | BIO2    | 0.571709 | 0.508732 | 0.767948919 | 0.549563 | 0.54359972 |
| YDL153c | SAS10   | 0.571389 | 0.832549 | 0.553547042 | 1.133839 | 1.41305271 |
| YOR262w | YOR262w | 0.570796 | 0.668594 | 0.488030911 | 1.118556 | 1.16825789 |
| YDR068w | DOS2    | 0.570328 | 0.706823 | 0.471892053 | 1.005008 | 0.94817473 |
| YHR019c | DED81   | 0.56681  | 0.71658  | 0.767269688 | 1.723051 | 1.67941213 |
| YDR262w | YDR262w | 0.566664 | 0.701135 | 0.535501853 | 0.997371 | 1.01146016 |
| YGL154c | LYS5    | 0.565934 | 0.874865 | 0.41217332  | 0.841407 | 0.9996202  |
| YNL227c | JJJ1    | 0.565543 | 0.792468 | 0.471294354 | 1.228591 | 1.36257418 |
| YNL043c | YNL043c | 0.564704 | 1.098504 | 0.837873893 | 1.29493  | 1.01528328 |
| YGL202w | ARO8    | 0.564245 | 0.721058 | 0.605980654 | 2.408537 | 2.64383207 |
| YIL088c | AVT7    | 0.562246 | 0.626371 | 0.568350067 | 1.150159 | 0.97150313 |
| YLL056c | YLL056c | 0.561024 | 0.836575 | 0.613933221 | 0.849586 | 0.71399238 |
| YNR022c | MRPL50  | 0.560416 | 1.096678 | 0.563895495 | 1.545206 | 1.47712521 |
| YMR271c | URA10   | 0.559993 | 0.61752  | 0.757578456 | 1.196782 | 1.00943656 |
| YML108w | YML108w | 0.558968 | 0.573386 | 0.513651123 | 0.850413 | 0.90780798 |
| YER128w | YER128w | 0.558468 | 0.599672 | 0.448073292 | 0.835085 | 0.8392646  |
| YDL180w | YDL180w | 0.557727 | 0.820316 | 0.64049789  | 1.143668 | 1.13820315 |
| YBR144c | YBR144c | 0.557173 | 0.535982 | 0.510376552 | 1.068845 | 1.01909447 |
| YJR097w | JJJ3    | 0.557021 | 0.528975 | 0.465240346 | 0.989036 | 1.11022444 |
| YIL173w | VTH1    | 0.556844 | 0.742457 | 0.539901161 | 1.053283 | 1.0668226  |
| YBR293w | VBA2    | 0.556735 | 0.597582 | 0.533878123 | 0.863333 | 0.92187317 |
| YAR009c | YAR009c | 0.553816 | 0.473986 | 0.567805817 | 0.881443 | 1.51013533 |
| YKL029c | MAE1    | 0.553238 | 0.550263 | 0.566596991 | 1.010172 | 1.31958559 |
| YEL029c | BUD16   | 0.551369 | 0.43568  | 0.581321845 | 1.256036 | 1.24639936 |
| YGR029w | ERV1    | 0.55111  | 0.636361 | 0.615337243 | 0.942093 | 0.81138049 |

|         |         |          |          |             |          |            |
|---------|---------|----------|----------|-------------|----------|------------|
| YHR111w | UBA4    | 0.549998 | 0.670566 | 0.533068751 | 0.7333   | 0.68760707 |
| YLL018c | DPS1    | 0.548404 | 0.658114 | 0.708022561 | 1.85912  | 1.8444142  |
| YGL223c | COG1    | 0.548296 | 0.773006 | 0.661750608 | 1.695319 | 1.58415752 |
| YGL180w | ATG1    | 0.548127 | 0.882849 | 0.532770863 | 1.127288 | 1.15879712 |
| YOL052c | SPE2    | 0.547515 | 0.72913  | 0.631018821 | 1.348229 | 1.40138586 |
| YGL215w | CLG1    | 0.547269 | 0.998994 | 0.507354282 | 1.543207 | 2.16675313 |
| YKL166c | TPK3    | 0.546939 | 0.578819 | 0.510159717 | 1.096379 | 1.25971732 |
| YAL060w | BDH1    | 0.545651 | 1.207269 | 0.743185957 | 0.924958 | 0.87128241 |
| YIL023c | YKE4    | 0.544354 | 0.655817 | 0.54962603  | 0.743323 | 0.82889571 |
| YGL183c | MND1    | 0.543151 | 0.597352 | 0.48442426  | 0.717377 | 0.70231896 |
| YER081w | SER3    | 0.542916 | 1.440792 | 0.69041548  | 1.857815 | 2.19444426 |
| YLR051c | FCF2    | 0.542466 | 0.426441 | 0.459327201 | 0.786268 | 0.93940046 |
| YGL102c | YGL102c | 0.541983 | 0.660837 | 0.643238036 | 1.743371 | 1.16697048 |
| YDR527w | RBA50   | 0.540625 | 0.707424 | 0.466597118 | 1.123023 | 1.42677672 |
| YHL021c | FMP12   | 0.538487 | 2.193665 | 0.640437081 | 1.683307 | 1.48916468 |
| YPL199c | YPL199c | 0.538337 | 0.549616 | 0.6479542   | 0.984834 | 0.99199355 |
| YER042w | MXR1    | 0.537839 | 0.704114 | 0.468182272 | 0.710994 | 0.57864587 |
| YGL224c | SDT1    | 0.537325 | 0.952545 | 0.715662589 | 2.822379 | 3.06071708 |
| YOR101w | RAS1    | 0.536999 | 0.67371  | 0.596435181 | 1.206176 | 1.2670914  |
| YDR390c | UBA2    | 0.534292 | 1.082479 | 0.765659838 | 2.371991 | 2.37641572 |
| YHR067w | HTD2    | 0.53361  | 0.822606 | 0.737334154 | 1.066922 | 0.79180472 |
| YHR048w | YHK8    | 0.532691 | 0.69083  | 0.729638504 | 0.653429 | 0.70577138 |
| YPL252c | YAH1    | 0.530798 | 0.740937 | 0.50625781  | 0.785586 | 0.88276564 |
| YHR183w | GND1    | 0.530437 | 0.370487 | 0.49561477  | 1.00147  | 0.88396188 |
| YBR068c | BAP2    | 0.529698 | 0.992303 | 0.589441812 | 0.666604 | 0.5757418  |
| YHR161c | YAP1801 | 0.529576 | 0.58856  | 0.577430299 | 0.567731 | 0.8402653  |
| YIR036c | IRC24   | 0.529327 | 0.609855 | 0.477618171 | 0.543227 | 0.59521257 |
| YIL051c | MMF1    | 0.528897 | 0.37571  | 0.584393841 | 0.663308 | 0.51805993 |
| YDL066w | IDP1    | 0.528409 | 0.7552   | 0.323160136 | 1.101195 | 1.98234755 |
| YHR175w | CTR2    | 0.526502 | 0.407844 | 0.568342863 | 0.448691 | 0.40089247 |
| YGR208w | SER2    | 0.526411 | 0.470131 | 0.583511228 | 0.908061 | 1.17635209 |
| YGR154c | GTO1    | 0.525296 | 0.777725 | 0.489761628 | 0.99126  | 1.07024328 |
| YCR081w | SRB8    | 0.524699 | 0.594565 | 0.590685292 | 1.117162 | 1.07948318 |
| YOR316c | COT1    | 0.524561 | 0.591692 | 0.68379488  | 0.810437 | 0.71819141 |
| YKL205w | LOS1    | 0.523639 | 0.426413 | 0.459110974 | 1.033367 | 1.26189418 |
| YJL148w | RPA34   | 0.522863 | 0.497308 | 0.467140572 | 1.116716 | 1.34721535 |
| YOR201c | MRM1    | 0.521993 | 1.433512 | 0.610555707 | 1.44889  | 1.37632448 |

|         |         |          |          |             |          |            |
|---------|---------|----------|----------|-------------|----------|------------|
| YOL107w | YOL107w | 0.521876 | 0.91468  | 0.597550357 | 1.575875 | 1.27642638 |
| Unknown | Unknown | 0.519004 | 0.464789 | 0.491133354 | 0.796605 | 1.22366775 |
| YML045w | YML045w | 0.518942 | 0.547635 | 0.45085316  | 0.826822 | 1.0347137  |
| YER049w | TPA1    | 0.517719 | 0.4932   | 0.706057272 | 1.657705 | 1.97925316 |
| YLR179c | YLR179c | 0.51685  | 0.556    | 0.483173789 | 0.428825 | 0.38991391 |
| YAR010c | YAR010c | 0.515632 | 0.482014 | 0.401920776 | 0.932656 | 1.50380637 |
| YEL009c | GCN4    | 0.514538 | 0.626495 | 0.472605906 | 1.158468 | 1.55750198 |
| YGL148w | ARO2    | 0.513987 | 0.353662 | 0.570491392 | 1.127768 | 1.10543376 |
| YDR197w | CBS2    | 0.51374  | 0.7063   | 0.447589477 | 0.755709 | 0.86195533 |
| YBR111c | YSA1    | 0.51344  | 0.395971 | 0.988116294 | 0.679241 | 0.63967215 |
| YLR420w | URA4    | 0.511799 | 0.490731 | 0.752159816 | 1.137005 | 1.21460734 |
| YNL174w | YNL174w | 0.507827 | 0.637854 | 0.519712094 | 1.29835  | 1.41411277 |
| YDR045c | RPC11   | 0.506244 | 0.34429  | 0.56828524  | 0.839312 | 0.81810036 |
| YLR074c | BUD20   | 0.505342 | 0.751793 | 0.569440807 | 0.701183 | 0.66394654 |
| YDR531w | YDR531w | 0.504155 | 0.39977  | 0.468986885 | 0.971585 | 1.08427202 |
| YNL231c | PDR16   | 0.503825 | 1.212505 | 0.524154742 | 1.501606 | 1.6572711  |
| YBR257w | POP4    | 0.500821 | 0.608765 | 0.413625934 | 0.994057 | 1.01877801 |
| YHR112c | YHR112c | 0.497297 | 0.669033 | 0.535166767 | 0.769073 | 0.72121772 |
| YJR067c | YAE1    | 0.497243 | 0.501951 | 0.452218634 | 0.723092 | 0.68312944 |
| YJL071w | ARG2    | 0.497192 | 0.572988 | 0.399894493 | 1.843408 | 1.60380353 |
| YOL104c | NDJ1    | 0.495613 | 0.576196 | 0.438543828 | 0.534492 | 0.79433183 |
| YGR124w | ASN2    | 0.492271 | 0.950994 | 0.92783621  | 1.79508  | 1.50316429 |
| YLL051c | FRE6    | 0.490732 | 0.62261  | 0.522122293 | 1.045215 | 1.11763931 |
| YBR147w | RTC2    | 0.48809  | 0.942347 | 0.370040939 | 1.54827  | 2.06413954 |
| YDR126w | SWF1    | 0.486699 | 0.643793 | 0.45921668  | 0.8732   | 0.916246   |
| YDR067c | OCA6    | 0.481561 | 0.653438 | 0.505490561 | 0.825334 | 0.83164259 |
| YPR033c | HTS1    | 0.480512 | 0.469877 | 0.773406359 | 1.601431 | 1.73008219 |
| YDL178w | DLD2    | 0.479951 | 0.568558 | 0.691742138 | 1.406391 | 1.29062821 |
| YGR207c | YGR207c | 0.474832 | 0.528494 | 0.594337615 | 0.931691 | 0.83980539 |
| YBR035c | PDX3    | 0.473127 | 0.502666 | 0.529132632 | 0.943694 | 1.06029227 |
| YIR035c | YIR035c | 0.47309  | 0.326387 | 0.557195719 | 0.618492 | 0.49290102 |
| YIR005w | IST3    | 0.472457 | 0.558844 | 0.369544347 | 0.865466 | 0.96528546 |
| YNL229c | URE2    | 0.47158  | 0.710657 | 0.61088427  | 1.332426 | 1.37994313 |
| YMR046c | YMR046c | 0.470428 | 0.468916 | 0.381294318 | 0.86021  | 1.15458155 |
| YJL038c | LOH1    | 0.467884 | 0.729181 | 0.446755493 | 1.720773 | 2.4485714  |
| YML040w | YML040w | 0.467802 | 0.481966 | 0.339515112 | 0.891619 | 1.24762261 |
| YJR028w | YJR028w | 0.466933 | 0.453593 | 0.346851416 | 0.896197 | #N/A       |

|         |         |          |          |             |          |            |
|---------|---------|----------|----------|-------------|----------|------------|
| YNL241c | ZWF1    | 0.463619 | 1.049121 | 0.439036403 | 1.062837 | 1.31065852 |
| YHR122w | YHR122w | 0.463439 | 0.456039 | 0.465376926 | 1.699939 | 1.58767799 |
| YIL117c | PRM5    | 0.461081 | 0.41439  | 0.370550264 | 0.371294 | 0.5378113  |
| YBL005w | PDR3    | 0.460286 | 0.478561 | 0.372330461 | 0.932666 | 1.3292099  |
| YLR106c | MDN1    | 0.458718 | 0.714739 | 0.492499484 | 0.919485 | 0.91528315 |
| YJL088w | ARG3    | 0.457172 | 0.897514 | 0.453332005 | 2.065841 | 3.45960199 |
| Unknown | Unknown | 0.456264 | 0.463983 | 0.364584364 | 0.799794 | 1.26755931 |
| YIL003w | CFD1    | 0.456238 | 0.580506 | 0.447083514 | 1.34644  | 1.61738755 |
| YER073w | ALD5    | 0.455762 | 0.872701 | 0.617244794 | 1.807468 | 2.24654943 |
| YHR162w | YHR162w | 0.454043 | 0.521857 | 0.388421628 | 0.661119 | 0.63682534 |
| YOR226c | ISU2    | 0.453014 | 0.947667 | 0.576830474 | 0.707685 | 0.71773993 |
| YKL201c | MNN4    | 0.452686 | 0.876949 | 0.429282301 | 0.877026 | 0.90627794 |
| YBR044c | TCM62   | 0.452421 | 0.599114 | 0.509685713 | 0.986879 | 0.93220828 |
| YBL069w | AST1    | 0.452252 | 0.552527 | 0.483959736 | 1.293251 | 1.49478787 |
| YER060w | FCY21   | 0.447431 | 0.668176 | 0.492425353 | 1.137513 | 1.09812053 |
| YPR145w | ASN1    | 0.447415 | 0.856662 | 0.744460253 | 4.946102 | 4.79829895 |
| YOR303w | CPA1    | 0.445177 | 1.043172 | 0.457380016 | 2.373859 | 2.70955495 |
| YPR058w | YMC1    | 0.444661 | 0.383435 | 0.407998507 | 1.366271 | 1.35762663 |
| YPL188w | POS5    | 0.443018 | 0.713153 | 0.449194956 | 1.654543 | 1.77823311 |
| YKL184w | SPE1    | 0.441854 | 1.013715 | 0.616233685 | 2.15711  | 2.29769991 |
| YLR130c | ZRT2    | 0.438465 | 0.789659 | 0.594998004 | 2.500019 | 2.22070672 |
| YER092w | IES5    | 0.436796 | 0.427965 | 0.382594979 | 0.497198 | 0.48614344 |
| YDR384c | ATO3    | 0.433603 | 1.152607 | 0.430347234 | 1.648431 | 2.01341207 |
| YIL046w | MET30   | 0.433224 | 0.985204 | 0.498977593 | 0.993853 | 1.08913763 |
| YDR245w | MNN10   | 0.431047 | 0.518188 | 0.62202338  | 2.949269 | 3.37977745 |
| YBR248c | HIS7    | 0.430931 | 0.510003 | 0.437859966 | 1.528889 | 1.92948432 |
| YBR047w | FMP23   | 0.426554 | 0.429547 | 0.319707399 | 1.416059 | 1.42214032 |
| YHL023c | RMD11   | 0.425117 | 1.063001 | 0.484955392 | 1.885994 | 2.46292396 |
| YCL009c | ILV6    | 0.424835 | 0.685837 | 0.523400203 | 1.797585 | 1.51059465 |
| YNL129w | NRK1    | 0.424794 | 0.36041  | 0.451359878 | 1.043875 | 1.22728998 |
| YOR222w | ODC2    | 0.423882 | 0.995177 | 0.533695902 | 2.380902 | 2.24670378 |
| YKL030w | YKL030w | 0.423239 | 0.430848 | 0.373037077 | 0.517672 | 0.67535027 |
| YLR180w | SAM1    | 0.421135 | 0.590221 | 0.785788794 | 1.210501 | 0.98729061 |
| YDR469w | SDC1    | 0.42031  | 0.29123  | 0.377878201 | 0.689161 | 0.60824015 |
| YHR063c | PAN5    | 0.419919 | 0.573489 | 0.530452791 | 1.47584  | 1.17552729 |
| YJL060w | BNA3    | 0.417652 | 0.504149 | 0.394321481 | 0.793483 | 0.7425497  |
| YER055c | HIS1    | 0.417236 | 0.839002 | 0.528857187 | 2.132133 | 1.88974516 |

|         |         |          |          |             |          |            |
|---------|---------|----------|----------|-------------|----------|------------|
| YML018c | YML018c | 0.417078 | 0.386916 | 0.379438409 | 0.616134 | 0.71872075 |
| YGL057c | YGL057c | 0.416122 | 0.598101 | 0.519050583 | 0.965657 | 0.95280206 |
| YJR111c | YJR111c | 0.414699 | 1.05721  | 0.462673012 | 1.937993 | 1.80866753 |
| YNR068c | YNR068c | 0.413069 | 1.037993 | 0.3439122   | 1.912043 | 1.92165775 |
| YBR145w | ADH5    | 0.412919 | 0.44941  | 0.384399084 | 1.133623 | 1.22879234 |
| YMR123w | PKR1    | 0.411505 | 0.423502 | 0.406842436 | 0.703128 | 0.58929324 |
| YGR204w | ADE3    | 0.410168 | 0.726313 | 0.696455628 | 2.454687 | 2.87147002 |
| YDR487c | RIB3    | 0.409719 | 0.351953 | 0.391952448 | 0.893598 | 1.02503744 |
| YAL012w | CYS3    | 0.408585 | 0.351491 | 0.478027471 | 0.413753 | 0.41877259 |
| YGL059w | PKP2    | 0.408029 | 0.769045 | 0.555336602 | 1.816275 | 1.9199989  |
| YBR297w | MAL33   | 0.40747  | 0.788259 | 0.441584146 | 1.144971 | 0.95022561 |
| YDR354w | TRP4    | 0.405381 | 0.821073 | 0.524145277 | 2.101211 | 1.84068846 |
| YJR148w | BAT2    | 0.405189 | 0.711904 | 0.496578289 | 1.105206 | 1.24012269 |
| YMR321c | YMR321c | 0.400989 | 0.530328 | 0.531600295 | 1.159566 | 1.163508   |
| YOR128c | ADE2    | 0.397487 | 0.863518 | 0.436615769 | 1.56678  | 1.60667847 |
| YML116w | ATR1    | 0.397343 | 0.29386  | 0.33652846  | 0.695641 | 0.79889662 |
| YJR016c | ILV3    | 0.397164 | 0.525598 | 0.664549743 | 1.327704 | 1.25754224 |
| YGR057c | LST7    | 0.388333 | 0.448364 | 0.390971715 | 0.79673  | 0.80697499 |
| YER090w | TRP2    | 0.387489 | 0.524319 | 0.526630887 | 2.418225 | 3.09516125 |
| YJL101c | GSH1    | 0.386674 | 0.62933  | 0.397255555 | 1.048096 | 1.18891206 |
| YNL221c | POP1    | 0.385158 | 0.746306 | 0.362149969 | 2.154613 | 2.34886532 |
| YGR267c | FOL2    | 0.385088 | 0.523764 | 0.41486193  | 0.945248 | 0.90247732 |
| YHR020w | YHR020w | 0.384974 | 0.530028 | 0.596839541 | 3.24136  | 3.62379572 |
| YJR139c | HOM6    | 0.383994 | 0.313339 | 0.630085059 | 1.000415 | 0.83782345 |
| YGR065c | VHT1    | 0.380841 | 0.441619 | 0.323360158 | 0.795396 | 0.81401402 |
| YHL036w | MUP3    | 0.378137 | 0.412473 | 0.31334291  | 0.351415 | 0.34933215 |
| YGL125w | MET13   | 0.370439 | 0.821568 | 0.41124597  | 2.249733 | 2.35083958 |
| YJL213w | YJL213w | 0.368714 | 0.411765 | 0.206884914 | 0.720152 | 0.86714042 |
| YIL094c | LYS12   | 0.359584 | 0.294212 | 0.534205737 | 1.575037 | 1.35981514 |
| YMR058w | FET3    | 0.359175 | 0.345655 | 0.652022397 | 1.636705 | 1.47100334 |
| Unknown | Unknown | 0.358179 | 0.477528 | 0.391920608 | 0.68526  | 0.59633194 |
| YPL092w | SSU1    | 0.3478   | 0.982861 | 0.443395116 | 4.000474 | 3.90390769 |
| YPL052w | OAZ1    | 0.347145 | 0.223193 | 0.297146061 | 0.649907 | 0.6523563  |
| YLR355c | ILV5    | 0.346592 | 0.838036 | 0.393638374 | 0.842569 | 0.76787672 |
| YDR408c | ADE8    | 0.346298 | 0.477611 | 0.290130498 | 1.315886 | 1.2068644  |
| YKL211c | TRP3    | 0.345184 | 0.604458 | 0.542972289 | 2.940483 | 2.82105494 |
| YOR202w | HIS3    | 0.336758 | 0.587197 | 0.313287744 | 1.594636 | 1.88738664 |

|         |         |          |          |             |          |            |
|---------|---------|----------|----------|-------------|----------|------------|
| YDL200c | MGT1    | 0.336209 | 0.377574 | 0.292470995 | 0.66402  | 0.55195127 |
| YIR034c | LYS1    | 0.334109 | 0.594195 | 0.347166721 | 1.922336 | 2.76111892 |
| YOR184w | SER1    | 0.332104 | 0.656295 | 0.53053314  | 0.938347 | 0.90514308 |
| YFL028c | CAF16   | 0.331741 | 0.483843 | 0.453602809 | 1.225388 | 1.01528788 |
| YGL026c | TRP5    | 0.327399 | 0.521818 | 0.38644282  | 2.9186   | 3.13323997 |
| YAL063c | FLO9    | 0.324991 | 0.479724 | 0.277743779 | 0.712118 | 0.64018773 |
| YFL019c | YFL019c | 0.32287  | 0.506922 | 0.500334707 | 1.214202 | 1.0540542  |
| YBR213w | MET8    | 0.321809 | 0.28275  | 0.213212254 | 0.273642 | 0.27759274 |
| YOR108w | LEU9    | 0.319244 | 0.750126 | 0.423013935 | 2.492636 | 2.1426047  |
| YIL121w | QDR2    | 0.318638 | 0.314756 | 0.275975294 | 0.464955 | 0.47990132 |
| YBR294w | SUL1    | 0.318168 | 0.444096 | 0.285237122 | 0.640682 | 0.56391295 |
| YGL234w | ADE5,7  | 0.313658 | 0.962277 | 0.366014263 | 2.862907 | 4.29419656 |
| YOL064c | MET22   | 0.310927 | 0.236496 | 0.248351737 | 0.866335 | 0.75469131 |
| YOR203w | YOR203w | 0.309398 | 0.650692 | 0.287407808 | 1.728402 | 1.89475571 |
| YDR037w | KRS1    | 0.299177 | 0.383009 | 0.506518145 | 2.765501 | 2.76351466 |
| YLR359w | ADE13   | 0.298397 | 0.786268 | 0.513956688 | 2.813914 | 2.91238483 |
| YKL218c | SRY1    | 0.296652 | 0.422265 | 0.285708274 | 1.405685 | 2.16029416 |
| YBR104w | YMC2    | 0.291697 | 0.34738  | 0.278456312 | 1.157649 | 1.37783831 |
| YIL116w | HIS5    | 0.281843 | 0.853146 | 0.267190112 | 1.753709 | 2.10594936 |
| YER061c | CEM1    | 0.275542 | 0.51799  | 0.324450858 | 1.064896 | 1.14985629 |
| YNL104c | LEU4    | 0.274938 | 0.543501 | 0.31577475  | 1.851804 | 1.76239518 |
| YOL119c | MCH4    | 0.271252 | 0.519264 | 0.242452948 | 1.211782 | 1.19592759 |
| YJR130c | STR2    | 0.267936 | 0.493578 | 0.278228784 | 2.914471 | 4.43927631 |
| YOR130c | ORT1    | 0.267082 | 0.431728 | 0.270729071 | 1.593149 | 1.71069908 |
| YDL131w | LYS21   | 0.266812 | 0.423052 | 0.358880354 | 2.252471 | 2.18272472 |
| YBR256c | RIB5    | 0.263698 | 0.359922 | 0.295482635 | 1.686107 | 1.41924156 |
| YER052c | HOM3    | 0.260799 | 0.476421 | 0.309383465 | 1.051371 | 1.15565256 |
| YBR249c | ARO4    | 0.243526 | 0.244586 | 0.324604766 | 1.884823 | 1.63236738 |
| YHR176w | FMO1    | 0.24311  | 0.233029 | 0.195871202 | 0.179183 | 0.17963429 |
| YAR015w | ADE1    | 0.239762 | 0.593722 | 0.29462067  | 1.570653 | 1.53936464 |
| YIL164c | NIT1    | 0.238303 | 0.475591 | 0.271391518 | 1.660102 | 2.06676327 |
| YDL059c | RAD59   | 0.237815 | 0.276673 | 0.216851538 | 0.274251 | 0.25225681 |
| YGL184c | STR3    | 0.234327 | 0.497898 | 0.143555741 | 0.914411 | 0.88868577 |
| YMR189w | GCV2    | 0.233215 | 0.270626 | 0.083506    | 0.733515 | 1.09634266 |
| YKR080w | MTD1    | 0.231684 | 0.576288 | 0.243238374 | 0.952918 | 0.89599123 |
| YJR137c | ECM17   | 0.228343 | 0.193614 | 0.193220495 | 0.634964 | 0.62877549 |
| YHR029c | YHI9    | 0.221657 | 0.140811 | 0.147727192 | 2.405983 | 2.4463484  |



|         |         |          |          |             |          |            |
|---------|---------|----------|----------|-------------|----------|------------|
| YLL055w | YCT1    | 0.216987 | 0.306469 | 0.28083065  | 0.342167 | 0.38012242 |
| YDL182w | LYS20   | 0.21066  | 0.420586 | 0.311332224 | 1.44774  | 3.03206333 |
| YMR108w | ILV2    | 0.20693  | 0.424924 | 0.232597578 | 2.053888 | 2.48208524 |
| YHR018c | ARG4    | 0.199403 | 0.731919 | 0.236122855 | 2.974108 | 3.0927076  |
| YJR109c | CPA2    | 0.195016 | 0.587987 | 0.329723214 | 4.638143 | 5.21760152 |
| YLR089c | ALT1    | 0.189632 | 0.418579 | 0.252059572 | 1.191115 | 1.09489504 |
| YNL277w | MET2    | 0.188148 | 0.341634 | 0.177423346 | 0.622283 | 0.49924745 |
| YIL074c | SER33   | 0.182703 | 0.381511 | 0.232744094 | 0.680921 | 0.7637922  |
| YDR035w | ARO3    | 0.180937 | 0.396202 | 0.205551367 | 2.043531 | 1.77586732 |
| YCL030c | HIS4    | 0.176809 | 0.535582 | 0.26396773  | 4.475362 | 4.75649462 |
| YDL198c | GGC1    | 0.171335 | 0.279786 | 0.215257407 | 1.643132 | 1.58326679 |
| YHR208w | BAT1    | 0.168847 | 0.303784 | 0.23043969  | 0.82705  | 0.99111698 |
| YIL028w | YIL028w | 0.167643 | 0.341275 | 0.238417255 | 0.647476 | 0.74560508 |
| YER091c | MET6    | 0.165528 | 0.230941 | 0.25851052  | 1.657827 | 1.31160519 |
| YIL165c | YIL165c | 0.16354  | 0.269224 | 0.134647069 | 1.309127 | 1.72089499 |
| YER175c | TMT1    | 0.163229 | 0.352032 | 0.266799112 | 1.242886 | 1.05293163 |
| YAL044c | GCV3    | 0.162092 | 0.242892 | 0.165978071 | 0.583852 | 0.52809693 |
| YJL217w | REE1    | 0.161399 | 0.251678 | 0.270629526 | 0.614331 | 0.40118381 |
| YDR253c | MET32   | 0.155392 | 0.182696 | 0.262083325 | 1.729566 | 1.29691141 |
| YNL220w | ADE12   | 0.148879 | 0.338559 | 0.205343299 | 1.865016 | 2.14542722 |
| YKL120w | OAC1    | 0.14385  | 0.221244 | 0.206657474 | 0.633418 | 0.71510822 |
| YLR364w | GRX8    | 0.141859 | 0.131686 | 0.13297188  | 0.090446 | 0.08528037 |
| YOL058w | ARG1    | 0.140544 | 0.622102 | 0.350528217 | 4.593618 | 5.99706082 |
| YJR010w | MET3    | 0.139147 | 0.200159 | 0.151877073 | 0.194711 | 0.16252982 |
| YMR095c | SNO1    | 0.138638 | 0.175667 | 0.109047466 | 0.660534 | 0.72262583 |
| YGL009c | LEU1    | 0.126534 | 0.297242 | 0.244430165 | 0.924011 | 0.8556033  |
| YPR167c | MET16   | 0.125807 | 0.205862 | 0.099857577 | 0.480685 | 0.46878485 |
| YIR017c | MET28   | 0.11927  | 0.243393 | 0.084509796 | 0.411247 | 0.3118046  |
| YMR120c | ADE17   | 0.114765 | 0.632024 | 0.152362132 | 1.829756 | 1.71878249 |
| YGL117w | YGL117w | 0.095729 | 0.37535  | 0.144811989 | 2.367521 | 2.57144922 |
| YDR019c | GCV1    | 0.092793 | 0.263972 | 0.080381165 | 0.730715 | 0.81650171 |
| YLR058c | SHM2    | 0.07763  | 0.265243 | 0.109757216 | 0.867517 | 0.8941733  |
| YKL001c | MET14   | 0.071849 | 0.053951 | 0.067131274 | 0.163764 | 0.1049483  |
| YMR094w | CTF13   | 0.06213  | 0.085562 | 0.043310456 | 0.381236 | 0.4242622  |
