# Supplementary material
Source: PubMed Central journal article supplement (PMC3122233)
Supplement: supp_M111.228072_supplementary_figure_3.pdf [file supp_M111.228072_supplementary_figure_3.pdf]

**A**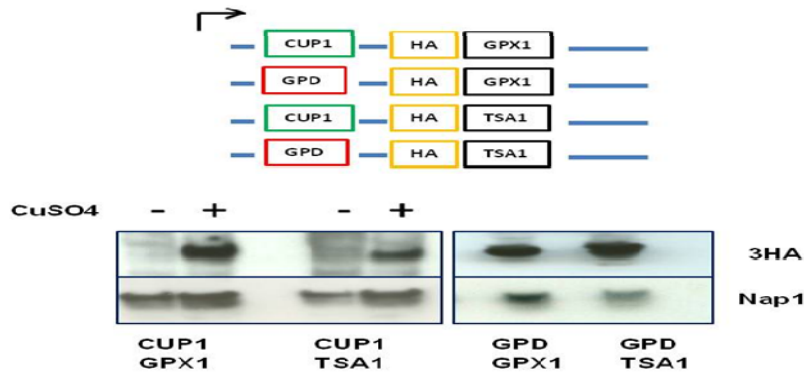**B**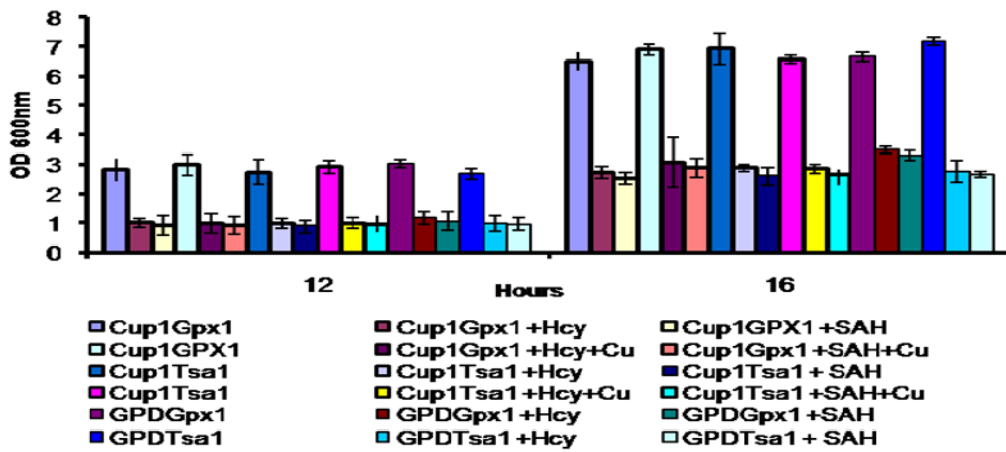

### Supplementary figure 3

**Supplementary figure 3: Over expression of antioxidant genes.** (A) Glutathione peroxidase (GPX1) and thiol-specific antioxidant (TSA1) gene endogenous promoter were replaced by copper inducible (CUP1) and constitutive GPD promoter in str4Δ strain, along with HA epitope tag at N terminal of respective genes. Over expression of genes were confirmed by western blotting using anti-HA antibody and loading control Nap1p antibody. To check induction of copper inducible promoter cells, were treated with 100 μm CuSO<sub>4</sub>, collected after 4 hours, upon cell lysis analyzed by anti-HA and Nap1p antibody. (B). Growth inhibition in str4Δ strain over expressed with antioxidant genes. Promoter substituted strains were grown in presence and absence of 5mM Homocysteine and 600 μm SAH, for copper inducible strains 100 μm CuSO<sub>4</sub> was added to media, aliquots of yeast cells were taken at indicated time points and the growth was monitored at 600nm. The data represent means ± SD (n=3).
