# Supplementary material
Source: PubMed Central journal article supplement (PMC3122233)
Supplement: supp_M111.228072_supplementary_figure__4.pdf [file supp_M111.228072_supplementary_figure__4.pdf]

**A**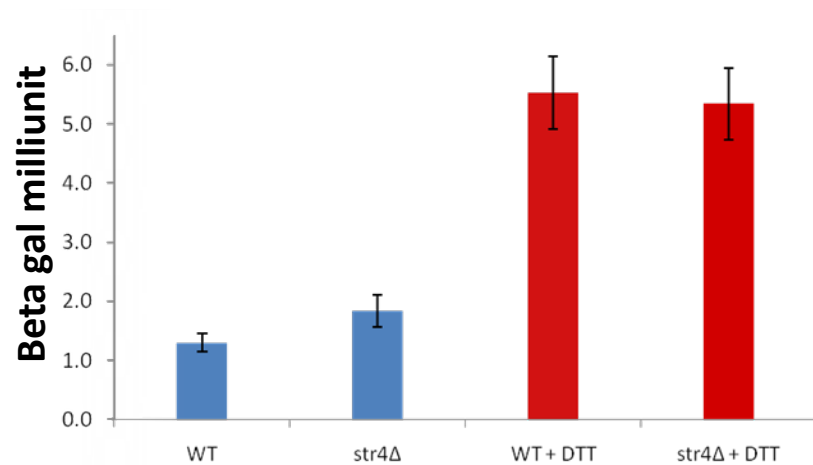**B**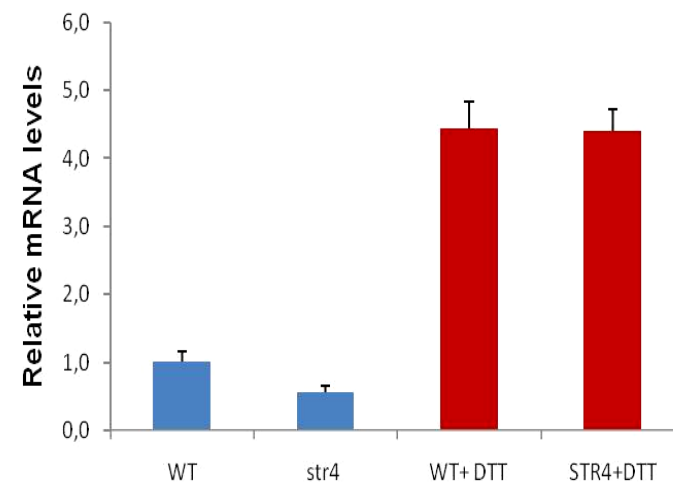**C**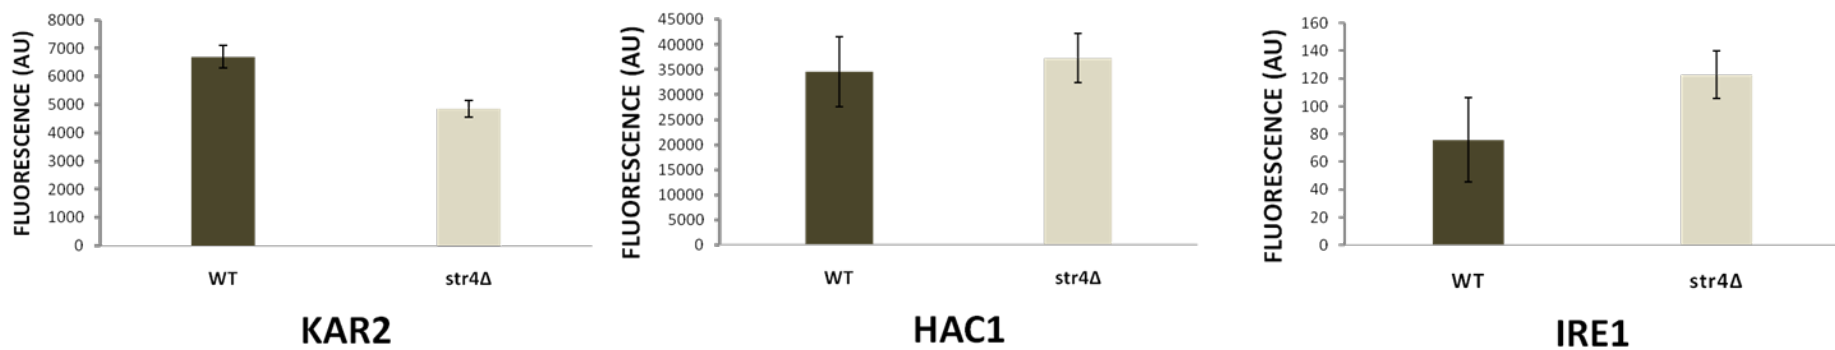

Supplementary figure4

#### **Supplementary figure 4 : ER stress response in wild type and str4 $\Delta$ strain**

(A) Cells were transformed with a plasmid (pJC005), a 2 $\mu$  plasmid carrying the lacZ gene under the control of the UPRE from the KAR2 promoter. LacZ expressions were measured in both strains as mentioned in experimental procedures

(B) ER stress response were evaluated in both strains with and without treatment with DTT for 3 hours.

RNA was isolated and KAR2 gene expression analyzed using Real time PCR

(C) Comparison of basal level of expression of the genes (Kar2, Hac1 and Ire1) involved in the ER stress pathway as obtained from the microarray experiments using wild type and mutant strain. Error bars are representative of means  $\pm$  SD (n=3).
