# Supplementary material
Source: PubMed Central journal article supplement (PMC3122233)

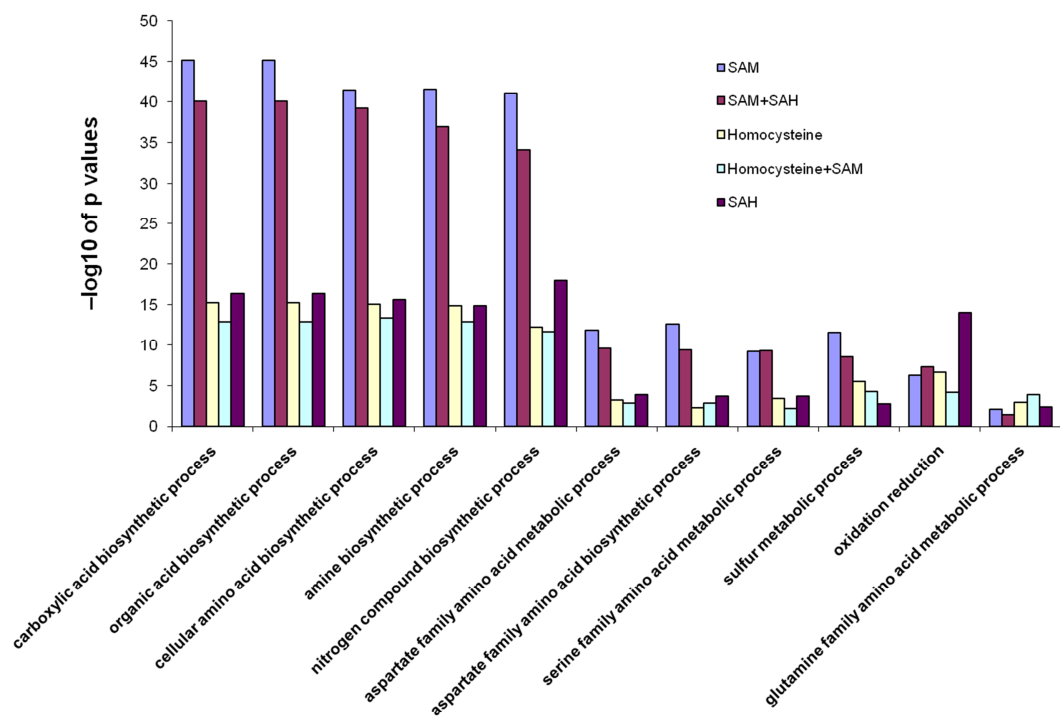

Supplemental figure 2

Supplement: supp_M111.228072_Supplemental_figure_2.pdf [file supp_M111.228072_Supplemental_figure_2.pdf]
